# Supplementary material for: Major antigen and paramyosin proteins as candidate biomarkers for serodiagnosis of canine infection by zoonotic Onchocerca lupi
Source: PLoS Negl Trop Dis. 2021 Feb 10;15(2):e0009027. doi: 10.1371/journal.pntd.0009027 (PMC7875354; doi:10.1371/journal.pntd.0009027)
Supplement: S5 Table — The parameters included in the table are: the row and column number of the microarray plate, peptide sequence, signal intensity against O. lupi dog serum diluted 1:1000, standard deviation, deviation [%], corrected signal intensity against O. lupi dog serum diluted 1:1000. The table was generated from the formatted raw data and lists averaged spot intensities and spot-to-spot deviations. Spots with a deviation of >40% were zeroed in the column with the corrected intensity values. (XLSX) [file pntd.0009027.s006.xlsx]

## Sheet: Foglio1
Supplementary Table 5. Peptide mapping Summary Onchocerca lupi Major antigen and Paramyosin - Dog Serum O. lupi
Row	Column	Peptide	Antigen	Dog serum O. lupi, 1:1000	Deviation	Deviation [%]	Dog serum O. lupi 1:1000 (corr.)
2	2	GSGSGSGMEQAREGA	O. lupi female	73	73	1	0
2	3	SGSGSGMEQAREGAP	O. lupi female	37	32	0.864865	0
2	4	GSGSGMEQAREGAPS	O. lupi female	0	0	0	0
2	5	SGSGMEQAREGAPSK	O. lupi female	0	0	0	0
2	6	GSGMEQAREGAPSKE	O. lupi female	0	0	0	0
2	7	SGMEQAREGAPSKER	O. lupi female	0	0	0	0
2	8	GMEQAREGAPSKERR	O. lupi female	25.5	25.5	1	0
2	9	MEQAREGAPSKERRS	O. lupi female	0	0	0	0
2	10	EQAREGAPSKERRSA	O. lupi female	0	0	0	0
2	11	QAREGAPSKERRSAE	O. lupi female	0	0	0	0
2	12	AREGAPSKERRSAEK	O. lupi female	0	0	0	0
2	13	REGAPSKERRSAEKT	O. lupi female	0	0	0	0
2	14	EGAPSKERRSAEKTI	O. lupi female	0	0	0	0
2	15	GAPSKERRSAEKTIS	O. lupi female	0	0	0	0
2	16	APSKERRSAEKTISR	O. lupi female	0	0	0	0
2	17	PSKERRSAEKTISRE	O. lupi female	0	0	0	0
2	18	SKERRSAEKTISRET	O. lupi female	188.5	188.5	1	0
2	19	KERRSAEKTISRETK	O. lupi female	0	0	0	0
2	20	ERRSAEKTISRETKY	O. lupi female	101	80	0.792079	0
2	21	RRSAEKTISRETKYE	O. lupi female	742	102	0.137466	742
2	22	RSAEKTISRETKYEI	O. lupi female	173.5	49.5	0.285303	173.5
2	23	SAEKTISRETKYEIA	O. lupi female	0	0	0	0
2	24	AEKTISRETKYEIAA	O. lupi female	0	0	0	0
2	25	EKTISRETKYEIAAS	O. lupi female	0	0	0	0
2	26	KTISRETKYEIAASD	O. lupi female	0	0	0	0
2	27	TISRETKYEIAASDG	O. lupi female	34	34	1	0
2	28	ISRETKYEIAASDGD	O. lupi female	46	46	1	0
2	29	SRETKYEIAASDGDI	O. lupi female	0	0	0	0
2	30	RETKYEIAASDGDIG	O. lupi female	143.5	125.5	0.874564	0
2	31	ETKYEIAASDGDIGT	O. lupi female	0	0	0	0
2	32	TKYEIAASDGDIGTD	O. lupi female	0	0	0	0
2	33	KYEIAASDGDIGTDN	O. lupi female	0	0	0	0
2	34	YEIAASDGDIGTDNI	O. lupi female	0	0	0	0
2	35	EIAASDGDIGTDNIE	O. lupi female	0	0	0	0
2	36	IAASDGDIGTDNIEY	O. lupi female	503.5	19.5	0.0387289	503.5
2	37	AASDGDIGTDNIEYI	O. lupi female	754.5	77.5	0.102717	754.5
2	38	ASDGDIGTDNIEYID	O. lupi female	84.5	63.5	0.751479	0
2	39	SDGDIGTDNIEYIDS	O. lupi female	0	0	0	0
2	40	DGDIGTDNIEYIDSV	O. lupi female	0	0	0	0
2	41	GDIGTDNIEYIDSVD	O. lupi female	257	33	0.128405	257
2	42	DIGTDNIEYIDSVDS	O. lupi female	28.5	28.5	1	0
2	43	IGTDNIEYIDSVDST	O. lupi female	0	0	0	0
2	44	GTDNIEYIDSVDSTG	O. lupi female	22	22	1	0
2	45	TDNIEYIDSVDSTGL	O. lupi female	0	0	0	0
2	46	DNIEYIDSVDSTGLG	O. lupi female	8	8	1	0
2	47	NIEYIDSVDSTGLGY	O. lupi female	1284.5	101.5	0.0790191	1284.5
2	48	IEYIDSVDSTGLGYG	O. lupi female	42	42	1	0
2	49	EYIDSVDSTGLGYGK	O. lupi female	0	0	0	0
2	50	YIDSVDSTGLGYGKT	O. lupi female	0	0	0	0
2	51	IDSVDSTGLGYGKTG	O. lupi female	0	0	0	0
2	52	DSVDSTGLGYGKTGE	O. lupi female	50	50	1	0
2	53	SVDSTGLGYGKTGEG	O. lupi female	0	0	0	0
2	54	VDSTGLGYGKTGEGI	O. lupi female	228.5	228.5	1	0
2	55	DSTGLGYGKTGEGIS	O. lupi female	0	0	0	0
2	56	STGLGYGKTGEGISR	O. lupi female	0	0	0	0
2	57	TGLGYGKTGEGISRI	O. lupi female	51.5	51.5	1	0
2	58	GLGYGKTGEGISRIL	O. lupi female	179	179	1	0
2	59	LGYGKTGEGISRILY	O. lupi female	898.5	226.5	0.252087	898.5
2	60	GYGKTGEGISRILYE	O. lupi female	1235.5	63.5	0.0513962	1235.5
2	61	YGKTGEGISRILYEH	O. lupi female	283.5	19.5	0.0687831	283.5
2	62	GKTGEGISRILYEHP	O. lupi female	0	0	0	0
2	63	KTGEGISRILYEHPR	O. lupi female	623.5	308.5	0.494787	0
2	64	TGEGISRILYEHPRD	O. lupi female	485	11	0.0226804	485
2	65	GEGISRILYEHPRDE	O. lupi female	928.5	117.5	0.126548	928.5
2	66	EGISRILYEHPRDEL	O. lupi female	1079.5	259.5	0.240389	1079.5
2	67	GISRILYEHPRDELI	O. lupi female	312	74	0.237179	312
4	2	ISRILYEHPRDELIN	O. lupi female	1099	257	0.233849	1099
4	3	SRILYEHPRDELINY	O. lupi female	4446.5	446.5	0.100416	4446.5
4	4	RILYEHPRDELINYK	O. lupi female	241	241	1	0
4	5	ILYEHPRDELINYKR	O. lupi female	228	218	0.95614	0
4	6	LYEHPRDELINYKRR	O. lupi female	1213.5	195.5	0.161104	1213.5
4	7	YEHPRDELINYKRRI	O. lupi female	486	20	0.0411523	486
4	8	EHPRDELINYKRRID	O. lupi female	0	0	0	0
4	9	HPRDELINYKRRIDA	O. lupi female	0	0	0	0
4	10	PRDELINYKRRIDAN	O. lupi female	0	0	0	0
4	11	RDELINYKRRIDANT	O. lupi female	0	0	0	0
4	12	DELINYKRRIDANTE	O. lupi female	0	0	0	0
4	13	ELINYKRRIDANTEQ	O. lupi female	0	0	0	0
4	14	LINYKRRIDANTEQQ	O. lupi female	173	148	0.855491	0
4	15	INYKRRIDANTEQQR	O. lupi female	53	3	0.0566038	53
4	16	NYKRRIDANTEQQRE	O. lupi female	0	0	0	0
4	17	YKRRIDANTEQQREH	O. lupi female	202.5	120.5	0.595062	0
4	18	KRRIDANTEQQREHA	O. lupi female	0	0	0	0
4	19	RRIDANTEQQREHAD	O. lupi female	80	80	1	0
4	20	RIDANTEQQREHADI	O. lupi female	0	0	0	0
4	21	IDANTEQQREHADIM	O. lupi female	234	234	1	0
4	22	DANTEQQREHADIMA	O. lupi female	2015	317	0.15732	2015
4	23	ANTEQQREHADIMAA	O. lupi female	137	85	0.620438	0
4	24	NTEQQREHADIMAAL	O. lupi female	432	432	1	0
4	25	TEQQREHADIMAALQ	O. lupi female	466	368	0.7897	0
4	26	EQQREHADIMAALQR	O. lupi female	566.5	531.5	0.938217	0
4	27	QQREHADIMAALQRK	O. lupi female	428	240	0.560748	0
4	28	QREHADIMAALQRKI	O. lupi female	0	0	0	0
4	29	REHADIMAALQRKIE	O. lupi female	216	52	0.240741	216
4	30	EHADIMAALQRKIEE	O. lupi female	257	204	0.793774	0
4	31	HADIMAALQRKIEEY	O. lupi female	5026	640	0.127338	5026
4	32	ADIMAALQRKIEEYR	O. lupi female	1707	80	0.0468658	1707
4	33	DIMAALQRKIEEYRR	O. lupi female	1949	385	0.197537	1949
4	34	IMAALQRKIEEYRRR	O. lupi female	352.5	45.5	0.129078	352.5
4	35	MAALQRKIEEYRRRF	O. lupi female	1647	113	0.0686096	1647
4	36	AALQRKIEEYRRRFA	O. lupi female	1159	9	0.00776531	1159
4	37	ALQRKIEEYRRRFAE	O. lupi female	1011.5	167.5	0.165596	1011.5
4	38	LQRKIEEYRRRFAEI	O. lupi female	1138	310	0.272408	1138
4	39	QRKIEEYRRRFAEIE	O. lupi female	598.5	119.5	0.199666	598.5
4	40	RKIEEYRRRFAEIEG	O. lupi female	0	0	0	0
4	41	KIEEYRRRFAEIEGR	O. lupi female	0	0	0	0
4	42	IEEYRRRFAEIEGRL	O. lupi female	2049.5	674.5	0.329105	2049.5
4	43	EEYRRRFAEIEGRLV	O. lupi female	421	108	0.256532	421
4	44	EYRRRFAEIEGRLVV	O. lupi female	336	6	0.0178571	336
4	45	YRRRFAEIEGRLVVH	O. lupi female	135	135	1	0
4	46	RRRFAEIEGRLVVHD	O. lupi female	0	0	0	0
4	47	RRFAEIEGRLVVHDL	O. lupi female	699	203	0.290415	699
4	48	RFAEIEGRLVVHDLN	O. lupi female	517	181	0.350097	517
4	49	FAEIEGRLVVHDLNE	O. lupi female	43.5	43.5	1	0
4	50	AEIEGRLVVHDLNES	O. lupi female	400	400	1	0
4	51	EIEGRLVVHDLNESG	O. lupi female	307.5	100.5	0.326829	307.5
4	52	IEGRLVVHDLNESGD	O. lupi female	0	0	0	0
4	53	EGRLVVHDLNESGDL	O. lupi female	233	233	1	0
4	54	GRLVVHDLNESGDLV	O. lupi female	182.5	130.5	0.715068	0
4	55	RLVVHDLNESGDLVN	O. lupi female	208	81	0.389423	208
4	56	LVVHDLNESGDLVNM	O. lupi female	420	10	0.0238095	420
4	57	VVHDLNESGDLVNMK	O. lupi female	1995.5	1533.5	0.768479	0
4	58	VHDLNESGDLVNMKL	O. lupi female	271.5	141.5	0.521179	0
4	59	HDLNESGDLVNMKLK	O. lupi female	728.5	728.5	1	0
4	60	DLNESGDLVNMKLKE	O. lupi female	893	194	0.217245	893
4	61	LNESGDLVNMKLKEE	O. lupi female	0	0	0	0
4	62	NESGDLVNMKLKEEW	O. lupi female	249	189	0.759036	0
4	63	ESGDLVNMKLKEEWL	O. lupi female	374	44	0.117647	374
4	64	SGDLVNMKLKEEWLL	O. lupi female	0	0	0	0
4	65	GDLVNMKLKEEWLLS	O. lupi female	543	543	1	0
4	66	DLVNMKLKEEWLLSP	O. lupi female	10	10	1	0
4	67	LVNMKLKEEWLLSPK	O. lupi female	0	0	0	0
6	2	VNMKLKEEWLLSPKF	O. lupi female	0	0	0	0
6	3	NMKLKEEWLLSPKFK	O. lupi female	1652	1652	1	0
6	4	MKLKEEWLLSPKFKM	O. lupi female	1642	674	0.410475	0
6	5	KLKEEWLLSPKFKME	O. lupi female	2707	1969	0.727373	0
6	6	LKEEWLLSPKFKMEE	O. lupi female	593.5	593.5	1	0
6	7	KEEWLLSPKFKMEEI	O. lupi female	0	0	0	0
6	8	EEWLLSPKFKMEEIG	O. lupi female	217	217	1	0
6	9	EWLLSPKFKMEEIGD	O. lupi female	0	0	0	0
6	10	WLLSPKFKMEEIGDV	O. lupi female	0	0	0	0
6	11	LLSPKFKMEEIGDVD	O. lupi female	1084	430	0.396679	1084
6	12	LSPKFKMEEIGDVDF	O. lupi female	809	103	0.127318	809
6	13	SPKFKMEEIGDVDFA	O. lupi female	1173	739	0.630009	0
6	14	PKFKMEEIGDVDFAN	O. lupi female	0	0	0	0
6	15	KFKMEEIGDVDFANQ	O. lupi female	773	773	1	0
6	16	FKMEEIGDVDFANQL	O. lupi female	759	709	0.934124	0
6	17	KMEEIGDVDFANQLE	O. lupi female	98	98	1	0
6	18	MEEIGDVDFANQLED	O. lupi female	0	0	0	0
6	19	EEIGDVDFANQLEDE	O. lupi female	0	0	0	0
6	20	EIGDVDFANQLEDER	O. lupi female	225.5	89.5	0.396896	225.5
6	21	IGDVDFANQLEDERR	O. lupi female	533.5	400.5	0.750703	0
6	22	GDVDFANQLEDERRR	O. lupi female	136	136	1	0
6	23	DVDFANQLEDERRRA	O. lupi female	0	0	0	0
6	24	VDFANQLEDERRRAE	O. lupi female	0	0	0	0
6	25	DFANQLEDERRRAED	O. lupi female	0	0	0	0
6	26	FANQLEDERRRAEDL	O. lupi female	0	0	0	0
6	27	ANQLEDERRRAEDLA	O. lupi female	383	383	1	0
6	28	NQLEDERRRAEDLAI	O. lupi female	284.5	284.5	1	0
6	29	QLEDERRRAEDLAIQ	O. lupi female	48	48	1	0
6	30	LEDERRRAEDLAIQL	O. lupi female	53	45	0.849057	0
6	31	EDERRRAEDLAIQLQ	O. lupi female	165	165	1	0
6	32	DERRRAEDLAIQLQQ	O. lupi female	0	0	0	0
6	33	ERRRAEDLAIQLQQE	O. lupi female	0	0	0	0
6	34	RRRAEDLAIQLQQER	O. lupi female	0	0	0	0
6	35	RRAEDLAIQLQQERL	O. lupi female	107	107	1	0
6	36	RAEDLAIQLQQERLQ	O. lupi female	0	0	0	0
6	37	AEDLAIQLQQERLQN	O. lupi female	0	0	0	0
6	38	EDLAIQLQQERLQND	O. lupi female	0	0	0	0
6	39	DLAIQLQQERLQNDQ	O. lupi female	3287	381	0.115911	3287
6	40	LAIQLQQERLQNDQL	O. lupi female	728	28	0.0384615	728
6	41	AIQLQQERLQNDQLQ	O. lupi female	0	0	0	0
6	42	IQLQQERLQNDQLQS	O. lupi female	0	0	0	0
6	43	QLQQERLQNDQLQSE	O. lupi female	223	223	1	0
6	44	LQQERLQNDQLQSEI	O. lupi female	299	299	1	0
6	45	QQERLQNDQLQSEIQ	O. lupi female	60	60	1	0
6	46	QERLQNDQLQSEIQR	O. lupi female	0	0	0	0
6	47	ERLQNDQLQSEIQRL	O. lupi female	358.5	59.5	0.165969	358.5
6	48	RLQNDQLQSEIQRLR	O. lupi female	2415	397	0.164389	2415
6	49	LQNDQLQSEIQRLRQ	O. lupi female	2526.5	1062.5	0.420542	2526.5
6	50	QNDQLQSEIQRLRQQ	O. lupi female	10.5	10.5	1	0
6	51	NDQLQSEIQRLRQQF	O. lupi female	697.5	148.5	0.212903	697.5
6	52	DQLQSEIQRLRQQFG	O. lupi female	0	0	0	0
6	53	QLQSEIQRLRQQFGI	O. lupi female	0	0	0	0
6	54	LQSEIQRLRQQFGIS	O. lupi female	0	0	0	0
6	55	QSEIQRLRQQFGISI	O. lupi female	243.5	243.5	1	0
6	56	SEIQRLRQQFGISIR	O. lupi female	0	0	0	0
6	57	EIQRLRQQFGISIRD	O. lupi female	455	285	0.626374	0
6	58	IQRLRQQFGISIRDK	O. lupi female	0	0	0	0
6	59	QRLRQQFGISIRDKE	O. lupi female	0	0	0	0
6	60	RLRQQFGISIRDKER	O. lupi female	174	174	1	0
6	61	LRQQFGISIRDKERI	O. lupi female	0	0	0	0
6	62	RQQFGISIRDKERIY	O. lupi female	167	167	1	0
6	63	QQFGISIRDKERIYQ	O. lupi female	73	73	1	0
6	64	QFGISIRDKERIYQT	O. lupi female	0	0	0	0
6	65	FGISIRDKERIYQTR	O. lupi female	0	0	0	0
6	66	GISIRDKERIYQTRE	O. lupi female	229	229	1	0
6	67	ISIRDKERIYQTRER	O. lupi female	394.5	394.5	1	0
8	2	SIRDKERIYQTRERN	O. lupi female	781.5	114.5	0.146513	781.5
8	3	IRDKERIYQTRERNF	O. lupi female	2113	5	0.0023663	2113
8	4	RDKERIYQTRERNFT	O. lupi female	0	0	0	0
8	5	DKERIYQTRERNFTR	O. lupi female	1	1	1	0
8	6	KERIYQTRERNFTRY	O. lupi female	667.5	110.5	0.165543	667.5
8	7	ERIYQTRERNFTRYL	O. lupi female	578	250	0.432526	0
8	8	RIYQTRERNFTRYLG	O. lupi female	38	38	1	0
8	9	IYQTRERNFTRYLGE	O. lupi female	2	2	1	0
8	10	YQTRERNFTRYLGEE	O. lupi female	42	42	1	0
8	11	QTRERNFTRYLGEEQ	O. lupi female	58.5	58.5	1	0
8	12	TRERNFTRYLGEEQR	O. lupi female	0	0	0	0
8	13	RERNFTRYLGEEQRK	O. lupi female	469.5	469.5	1	0
8	14	ERNFTRYLGEEQRKM	O. lupi female	3461	77	0.0222479	3461
8	15	RNFTRYLGEEQRKMM	O. lupi female	1565	623	0.398083	1565
8	16	NFTRYLGEEQRKMME	O. lupi female	1643	225	0.136945	1643
8	17	FTRYLGEEQRKMMEL	O. lupi female	2576	158	0.0613354	2576
8	18	TRYLGEEQRKMMELW	O. lupi female	2549	1439	0.564535	2549
8	19	RYLGEEQRKMMELWS	O. lupi female	2481.5	62.5	0.0251864	2481.5
8	20	YLGEEQRKMMELWSE	O. lupi female	165.5	165.5	1	0
8	21	LGEEQRKMMELWSEL	O. lupi female	496.5	219.5	0.442095	0
8	22	GEEQRKMMELWSELQ	O. lupi female	60	60	1	0
8	23	EEQRKMMELWSELQR	O. lupi female	1269.5	97.5	0.0768019	1269.5
8	24	EQRKMMELWSELQRV	O. lupi female	1160.5	168.5	0.145196	1160.5
8	25	QRKMMELWSELQRVR	O. lupi female	348	103	0.295977	348
8	26	RKMMELWSELQRVRK	O. lupi female	852.5	361.5	0.424047	0
8	27	KMMELWSELQRVRKQ	O. lupi female	944	174	0.184322	944
8	28	MMELWSELQRVRKQC	O. lupi female	135	135	1	0
8	29	MELWSELQRVRKQCA	O. lupi female	208.5	208.5	1	0
8	30	ELWSELQRVRKQCAE	O. lupi female	0	0	0	0
8	31	LWSELQRVRKQCAEY	O. lupi female	739.5	59.5	0.0804598	739.5
8	32	WSELQRVRKQCAEYR	O. lupi female	557	77	0.138241	557
8	33	SELQRVRKQCAEYRE	O. lupi female	66	66	1	0
8	34	ELQRVRKQCAEYREQ	O. lupi female	0	0	0	0
8	35	LQRVRKQCAEYREQT	O. lupi female	0	0	0	0
8	36	QRVRKQCAEYREQTE	O. lupi female	0	0	0	0
8	37	RVRKQCAEYREQTER	O. lupi female	7	7	1	0
8	38	VRKQCAEYREQTERD	O. lupi female	54	54	1	0
8	39	RKQCAEYREQTERDL	O. lupi female	93	93	1	0
8	40	KQCAEYREQTERDLE	O. lupi female	2	2	1	0
8	41	QCAEYREQTERDLEN	O. lupi female	353.5	1.5	0.00424328	353.5
8	42	CAEYREQTERDLENQ	O. lupi female	439	39	0.0888383	439
8	43	AEYREQTERDLENQR	O. lupi female	303.5	23.5	0.07743	303.5
8	44	EYREQTERDLENQRN	O. lupi female	373.5	373.5	1	0
8	45	YREQTERDLENQRNE	O. lupi female	0	0	0	0
8	46	REQTERDLENQRNEF	O. lupi female	1035.5	345.5	0.333655	1035.5
8	47	EQTERDLENQRNEFI	O. lupi female	1038	577	0.555877	0
8	48	QTERDLENQRNEFIK	O. lupi female	81	81	1	0
8	49	TERDLENQRNEFIKV	O. lupi female	69.5	69.5	1	0
8	50	ERDLENQRNEFIKVI	O. lupi female	339	339	1	0
8	51	RDLENQRNEFIKVIR	O. lupi female	543.5	521.5	0.959522	0
8	52	DLENQRNEFIKVIRH	O. lupi female	1378	388	0.281567	1378
8	53	LENQRNEFIKVIRHV	O. lupi female	0	0	0	0
8	54	ENQRNEFIKVIRHVS	O. lupi female	0	0	0	0
8	55	NQRNEFIKVIRHVSG	O. lupi female	0	0	0	0
8	56	QRNEFIKVIRHVSGI	O. lupi female	0	0	0	0
8	57	RNEFIKVIRHVSGIV	O. lupi female	0	0	0	0
8	58	NEFIKVIRHVSGIVR	O. lupi female	110	110	1	0
8	59	EFIKVIRHVSGIVRG	O. lupi female	0	0	0	0
8	60	FIKVIRHVSGIVRGL	O. lupi female	11.5	11.5	1	0
8	61	IKVIRHVSGIVRGLN	O. lupi female	0	0	0	0
8	62	KVIRHVSGIVRGLNI	O. lupi female	33	33	1	0
8	63	VIRHVSGIVRGLNIE	O. lupi female	37	37	1	0
8	64	IRHVSGIVRGLNIEN	O. lupi female	8.5	8.5	1	0
8	65	RHVSGIVRGLNIENG	O. lupi female	0	0	0	0
8	66	HVSGIVRGLNIENGT	O. lupi female	13	13	1	0
8	67	VSGIVRGLNIENGTH	O. lupi female	0	0	0	0
10	2	SGIVRGLNIENGTHT	O. lupi female	508	508	1	0
10	3	GIVRGLNIENGTHTL	O. lupi female	0	0	0	0
10	4	IVRGLNIENGTHTLL	O. lupi female	0	0	0	0
10	5	VRGLNIENGTHTLLS	O. lupi female	0	0	0	0
10	6	RGLNIENGTHTLLSD	O. lupi female	0	0	0	0
10	7	GLNIENGTHTLLSDL	O. lupi female	141	141	1	0
10	8	LNIENGTHTLLSDLS	O. lupi female	65.5	65.5	1	0
10	9	NIENGTHTLLSDLSS	O. lupi female	0	0	0	0
10	10	IENGTHTLLSDLSSE	O. lupi female	294	294	1	0
10	11	ENGTHTLLSDLSSES	O. lupi female	0	0	0	0
10	12	NGTHTLLSDLSSESG	O. lupi female	0	0	0	0
10	13	GTHTLLSDLSSESGV	O. lupi female	129	129	1	0
10	14	THTLLSDLSSESGVE	O. lupi female	296.5	217.5	0.733558	0
10	15	HTLLSDLSSESGVEI	O. lupi female	0	0	0	0
10	16	TLLSDLSSESGVEIT	O. lupi female	0	0	0	0
10	17	LLSDLSSESGVEITQ	O. lupi female	0	0	0	0
10	18	LSDLSSESGVEITQD	O. lupi female	0	0	0	0
10	19	SDLSSESGVEITQDT	O. lupi female	190	190	1	0
10	20	DLSSESGVEITQDTV	O. lupi female	123	123	1	0
10	21	LSSESGVEITQDTVL	O. lupi female	0	0	0	0
10	22	SSESGVEITQDTVLI	O. lupi female	225	225	1	0
10	23	SESGVEITQDTVLIE	O. lupi female	223.5	87.5	0.391499	223.5
10	24	ESGVEITQDTVLIEA	O. lupi female	467	467	1	0
10	25	SGVEITQDTVLIEAV	O. lupi female	500	186	0.372	500
10	26	GVEITQDTVLIEAVK	O. lupi female	0	0	0	0
10	27	VEITQDTVLIEAVKR	O. lupi female	501	501	1	0
10	28	EITQDTVLIEAVKRF	O. lupi female	19	19	1	0
10	29	ITQDTVLIEAVKRFH	O. lupi female	224	224	1	0
10	30	TQDTVLIEAVKRFHE	O. lupi female	213	213	1	0
10	31	QDTVLIEAVKRFHES	O. lupi female	148	148	1	0
10	32	DTVLIEAVKRFHESQ	O. lupi female	0	0	0	0
10	33	TVLIEAVKRFHESQQ	O. lupi female	0	0	0	0
10	34	VLIEAVKRFHESQQQ	O. lupi female	87	87	1	0
10	35	LIEAVKRFHESQQQA	O. lupi female	0	0	0	0
10	36	IEAVKRFHESQQQAA	O. lupi female	41	41	1	0
10	37	EAVKRFHESQQQAAP	O. lupi female	0	0	0	0
10	38	AVKRFHESQQQAAPV	O. lupi female	0	0	0	0
10	39	VKRFHESQQQAAPVI	O. lupi female	192	192	1	0
10	40	KRFHESQQQAAPVIG	O. lupi female	0	0	0	0
10	41	RFHESQQQAAPVIGP	O. lupi female	0	0	0	0
10	42	FHESQQQAAPVIGPE	O. lupi female	172.5	169.5	0.982609	0
10	43	HESQQQAAPVIGPEL	O. lupi female	0	0	0	0
10	44	ESQQQAAPVIGPELI	O. lupi female	0	0	0	0
10	45	SQQQAAPVIGPELIT	O. lupi female	0	0	0	0
10	46	QQQAAPVIGPELITE	O. lupi female	0	0	0	0
10	47	QQAAPVIGPELITEL	O. lupi female	0	0	0	0
10	48	QAAPVIGPELITELR	O. lupi female	0	0	0	0
10	49	AAPVIGPELITELRL	O. lupi female	248.5	7.5	0.0301811	248.5
10	50	APVIGPELITELRLA	O. lupi female	0	0	0	0
10	51	PVIGPELITELRLAR	O. lupi female	0	0	0	0
10	52	VIGPELITELRLART	O. lupi female	0	0	0	0
10	53	IGPELITELRLARTE	O. lupi female	22	22	1	0
10	54	GPELITELRLARTED	O. lupi female	0	0	0	0
10	55	PELITELRLARTEDA	O. lupi female	97.5	8.5	0.0871795	97.5
10	56	ELITELRLARTEDAG	O. lupi female	0	0	0	0
10	57	LITELRLARTEDAGL	O. lupi female	458	458	1	0
10	58	ITELRLARTEDAGLH	O. lupi female	56.5	56.5	1	0
10	59	TELRLARTEDAGLHD	O. lupi female	85.5	85.5	1	0
10	60	ELRLARTEDAGLHDE	O. lupi female	80.5	80.5	1	0
10	61	LRLARTEDAGLHDEL	O. lupi female	54	54	1	0
10	62	RLARTEDAGLHDELM	O. lupi female	316.5	43.5	0.137441	316.5
10	63	LARTEDAGLHDELMR	O. lupi female	767.5	215.5	0.280782	767.5
10	64	ARTEDAGLHDELMRK	O. lupi female	911	549	0.602634	0
10	65	RTEDAGLHDELMRKY	O. lupi female	469.5	3.5	0.00745474	469.5
10	66	TEDAGLHDELMRKYE	O. lupi female	1414	260	0.183876	0
10	67	EDAGLHDELMRKYEE	O. lupi female	716.5	80.5	0.112352	716.5
12	2	DAGLHDELMRKYEES	O. lupi female	1676.5	375.5	0.223979	1676.5
12	3	AGLHDELMRKYEESA	O. lupi female	2054	186	0.090555	2054
12	4	GLHDELMRKYEESAK	O. lupi female	600	292	0.486667	0
12	5	LHDELMRKYEESAKR	O. lupi female	360.5	137.5	0.381415	360.5
12	6	HDELMRKYEESAKRI	O. lupi female	317	119	0.375394	317
12	7	DELMRKYEESAKRII	O. lupi female	413.5	413.5	1	0
12	8	ELMRKYEESAKRIIE	O. lupi female	326.5	21.5	0.0658499	326.5
12	9	LMRKYEESAKRIIEL	O. lupi female	1666.5	33.5	0.020102	1666.5
12	10	MRKYEESAKRIIELE	O. lupi female	2676.5	418.5	0.156361	2676.5
12	11	RKYEESAKRIIELEA	O. lupi female	552	76	0.137681	552
12	12	KYEESAKRIIELEAR	O. lupi female	511	103	0.201566	511
12	13	YEESAKRIIELEARD	O. lupi female	576.5	80.5	0.139636	576.5
12	14	EESAKRIIELEARDD	O. lupi female	197	197	1	0
12	15	ESAKRIIELEARDDE	O. lupi female	0	0	0	0
12	16	SAKRIIELEARDDES	O. lupi female	0	0	0	0
12	17	AKRIIELEARDDESH	O. lupi female	217.5	215.5	0.990805	0
12	18	KRIIELEARDDESHN	O. lupi female	90.5	80.5	0.889503	0
12	19	RIIELEARDDESHNK	O. lupi female	211	211	1	0
12	20	IIELEARDDESHNKL	O. lupi female	42	42	1	0
12	21	IELEARDDESHNKLV	O. lupi female	424.5	228.5	0.53828	0
12	22	ELEARDDESHNKLVA	O. lupi female	214.5	34.5	0.160839	214.5
12	23	LEARDDESHNKLVAL	O. lupi female	7	7	1	0
12	24	EARDDESHNKLVALE	O. lupi female	478	196	0.410042	0
12	25	ARDDESHNKLVALES	O. lupi female	46	46	1	0
12	26	RDDESHNKLVALESD	O. lupi female	40	40	1	0
12	27	DDESHNKLVALESDL	O. lupi female	414	272	0.657005	0
12	28	DESHNKLVALESDLK	O. lupi female	112.5	112.5	1	0
12	29	ESHNKLVALESDLKR	O. lupi female	0	0	0	0
12	30	SHNKLVALESDLKRT	O. lupi female	108	108	1	0
12	31	HNKLVALESDLKRTR	O. lupi female	145	45	0.310345	145
12	32	NKLVALESDLKRTRD	O. lupi female	103.5	11.5	0.111111	103.5
12	33	KLVALESDLKRTRDR	O. lupi female	537.5	190.5	0.354419	537.5
12	34	LVALESDLKRTRDRL	O. lupi female	690.5	49.5	0.0716872	690.5
12	35	VALESDLKRTRDRLA	O. lupi female	25	25	1	0
12	36	ALESDLKRTRDRLAE	O. lupi female	26	26	1	0
12	37	LESDLKRTRDRLAES	O. lupi female	170	170	1	0
12	38	ESDLKRTRDRLAESQ	O. lupi female	104	104	1	0
12	39	SDLKRTRDRLAESQN	O. lupi female	0	0	0	0
12	40	DLKRTRDRLAESQNA	O. lupi female	68	12	0.176471	68
12	41	LKRTRDRLAESQNAL	O. lupi female	0	0	0	0
12	42	KRTRDRLAESQNALR	O. lupi female	0	0	0	0
12	43	RTRDRLAESQNALRK	O. lupi female	105.5	105.5	1	0
12	44	TRDRLAESQNALRKL	O. lupi female	819	323	0.394383	819
12	45	RDRLAESQNALRKLY	O. lupi female	1033.5	471.5	0.456217	0
12	46	DRLAESQNALRKLYD	O. lupi female	421.5	65.5	0.155397	421.5
12	47	RLAESQNALRKLYDM	O. lupi female	2465.5	557.5	0.22612	2465.5
12	48	LAESQNALRKLYDMT	O. lupi female	1520	1520	1	0
12	49	AESQNALRKLYDMTY	O. lupi female	157.5	157.5	1	0
12	50	ESQNALRKLYDMTYS	O. lupi female	652	263	0.403374	0
12	51	SQNALRKLYDMTYSY	O. lupi female	986	483	0.489858	0
12	52	QNALRKLYDMTYSYE	O. lupi female	1564	488	0.31202	1564
12	53	NALRKLYDMTYSYEI	O. lupi female	227.5	227.5	1	0
12	54	ALRKLYDMTYSYEIN	O. lupi female	364	364	1	0
12	55	LRKLYDMTYSYEINA	O. lupi female	0	0	0	0
12	56	RKLYDMTYSYEINAE	O. lupi female	0	0	0	0
12	57	KLYDMTYSYEINAEK	O. lupi female	0	0	0	0
12	58	LYDMTYSYEINAEKE	O. lupi female	0	0	0	0
12	59	YDMTYSYEINAEKET	O. lupi female	4884	376	0.0769861	4884
12	60	DMTYSYEINAEKETR	O. lupi female	547.5	271.5	0.49589	0
12	61	MTYSYEINAEKETRS	O. lupi female	0	0	0	0
12	62	TYSYEINAEKETRSP	O. lupi female	22	22	1	0
12	63	YSYEINAEKETRSPS	O. lupi female	0	0	0	0
12	64	SYEINAEKETRSPSP	O. lupi female	5	5	1	0
12	65	YEINAEKETRSPSPA	O. lupi female	0	0	0	0
12	66	EINAEKETRSPSPAK	O. lupi female	0	0	0	0
12	67	INAEKETRSPSPAKG	O. lupi female	0	0	0	0
14	2	NAEKETRSPSPAKGY	O. lupi female	0	0	0	0
14	3	AEKETRSPSPAKGYV	O. lupi female	120.5	120.5	1	0
14	4	EKETRSPSPAKGYVP	O. lupi female	0	0	0	0
14	5	KETRSPSPAKGYVPP	O. lupi female	0	0	0	0
14	6	ETRSPSPAKGYVPPP	O. lupi female	0	0	0	0
14	7	TRSPSPAKGYVPPPE	O. lupi female	0	0	0	0
14	8	RSPSPAKGYVPPPEV	O. lupi female	0	0	0	0
14	9	SPSPAKGYVPPPEVV	O. lupi female	0	0	0	0
14	10	PSPAKGYVPPPEVVR	O. lupi female	94.5	94.5	1	0
14	11	SPAKGYVPPPEVVRS	O. lupi female	0	0	0	0
14	12	PAKGYVPPPEVVRSV	O. lupi female	0	0	0	0
14	13	AKGYVPPPEVVRSVR	O. lupi female	2.5	2.5	1	0
14	14	KGYVPPPEVVRSVRY	O. lupi female	783.5	192.5	0.245692	783.5
14	15	GYVPPPEVVRSVRYV	O. lupi female	0	0	0	0
14	16	YVPPPEVVRSVRYVL	O. lupi female	18	18	1	0
14	17	VPPPEVVRSVRYVLN	O. lupi female	0	0	0	0
14	18	PPPEVVRSVRYVLNS	O. lupi female	0	0	0	0
14	19	PPEVVRSVRYVLNSR	O. lupi female	0	0	0	0
14	20	PEVVRSVRYVLNSRA	O. lupi female	0	0	0	0
14	21	EVVRSVRYVLNSRAN	O. lupi female	0	0	0	0
14	22	VVRSVRYVLNSRAND	O. lupi female	0	0	0	0
14	23	VRSVRYVLNSRANDN	O. lupi female	0	0	0	0
14	24	RSVRYVLNSRANDNN	O. lupi female	0	0	0	0
14	25	SVRYVLNSRANDNNV	O. lupi female	179	179	1	0
14	26	VRYVLNSRANDNNVL	O. lupi female	316	120	0.379747	316
14	27	RYVLNSRANDNNVLQ	O. lupi female	0	0	0	0
14	28	YVLNSRANDNNVLQR	O. lupi female	163.5	163.5	1	0
14	29	VLNSRANDNNVLQRK	O. lupi female	601	279	0.464226	0
14	30	LNSRANDNNVLQRKL	O. lupi female	0	0	0	0
14	31	NSRANDNNVLQRKLK	O. lupi female	0	0	0	0
14	32	SRANDNNVLQRKLKN	O. lupi female	132.5	132.5	1	0
14	33	RANDNNVLQRKLKNA	O. lupi female	0	0	0	0
14	34	ANDNNVLQRKLKNAE	O. lupi female	34	34	1	0
14	35	NDNNVLQRKLKNAEI	O. lupi female	0	0	0	0
14	36	DNNVLQRKLKNAEIQ	O. lupi female	0	0	0	0
14	37	NNVLQRKLKNAEIQI	O. lupi female	109.5	109.5	1	0
14	38	NVLQRKLKNAEIQIS	O. lupi female	0	0	0	0
14	39	VLQRKLKNAEIQISE	O. lupi female	0	0	0	0
14	40	LQRKLKNAEIQISEL	O. lupi female	57	57	1	0
14	41	QRKLKNAEIQISELT	O. lupi female	0	0	0	0
14	42	RKLKNAEIQISELTN	O. lupi female	0	0	0	0
14	43	KLKNAEIQISELTNK	O. lupi female	0	0	0	0
14	44	LKNAEIQISELTNKN	O. lupi female	243	243	1	0
14	45	KNAEIQISELTNKND	O. lupi female	0	0	0	0
14	46	NAEIQISELTNKNDS	O. lupi female	0	0	0	0
14	47	AEIQISELTNKNDSL	O. lupi female	0	0	0	0
14	48	EIQISELTNKNDSLE	O. lupi female	0	0	0	0
14	49	IQISELTNKNDSLEE	O. lupi female	16748	146	0.00871746	16748
14	50	QISELTNKNDSLEEI	O. lupi female	3343.5	137.5	0.0411246	3343.5
14	51	ISELTNKNDSLEEIR	O. lupi female	1007	29	0.0287984	1007
14	52	SELTNKNDSLEEIRR	O. lupi female	380	219	0.576316	380
14	53	ELTNKNDSLEEIRRR	O. lupi female	964.5	363.5	0.376879	964.5
14	54	LTNKNDSLEEIRRRL	O. lupi female	1247	249	0.199679	1247
14	55	TNKNDSLEEIRRRLE	O. lupi female	2757.5	233.5	0.0846782	2757.5
14	56	NKNDSLEEIRRRLEK	O. lupi female	322	322	1	0
14	57	KNDSLEEIRRRLEKQ	O. lupi female	0	0	0	0
14	58	NDSLEEIRRRLEKQI	O. lupi female	21	21	1	0
14	59	DSLEEIRRRLEKQIA	O. lupi female	165	165	1	0
14	60	SLEEIRRRLEKQIAE	O. lupi female	0	0	0	0
14	61	LEEIRRRLEKQIAEA	O. lupi female	759.5	759.5	1	0
14	62	EEIRRRLEKQIAEAN	O. lupi female	0	0	0	0
14	63	EIRRRLEKQIAEANR	O. lupi female	195	157	0.805128	0
14	64	IRRRLEKQIAEANRT	O. lupi female	0	0	0	0
14	65	RRRLEKQIAEANRTI	O. lupi female	51	51	1	0
14	66	RRLEKQIAEANRTIT	O. lupi female	56	56	1	0
14	67	RLEKQIAEANRTITH	O. lupi female	0	0	0	0
16	2	LEKQIAEANRTITHR	O. lupi female	100.5	3.5	0.0348259	100.5
16	3	EKQIAEANRTITHRQ	O. lupi female	0	0	0	0
16	4	KQIAEANRTITHRQR	O. lupi female	7.5	7.5	1	0
16	5	QIAEANRTITHRQRE	O. lupi female	582	86	0.147766	582
16	6	IAEANRTITHRQREL	O. lupi female	225.5	38.5	0.170732	225.5
16	7	AEANRTITHRQRELD	O. lupi female	277	25	0.0902527	277
16	8	EANRTITHRQRELDD	O. lupi female	323.5	36.5	0.112828	323.5
16	9	ANRTITHRQRELDDA	O. lupi female	118.5	28.5	0.240506	118.5
16	10	NRTITHRQRELDDAK	O. lupi female	603	337	0.558872	0
16	11	RTITHRQRELDDAKH	O. lupi female	540	540	1	0
16	12	TITHRQRELDDAKHT	O. lupi female	0	0	0	0
16	13	ITHRQRELDDAKHTV	O. lupi female	4.5	4.5	1	0
16	14	THRQRELDDAKHTVK	O. lupi female	257	127	0.494163	0
16	15	HRQRELDDAKHTVKD	O. lupi female	382	34	0.0890052	382
16	16	RQRELDDAKHTVKDL	O. lupi female	36	36	1	0
16	17	QRELDDAKHTVKDLE	O. lupi female	182	182	1	0
16	18	RELDDAKHTVKDLED	O. lupi female	64.5	64.5	1	0
16	19	ELDDAKHTVKDLEDR	O. lupi female	0	0	0	0
16	20	LDDAKHTVKDLEDRL	O. lupi female	656	10	0.0152439	656
16	21	DDAKHTVKDLEDRLR	O. lupi female	250.5	250.5	1	0
16	22	DAKHTVKDLEDRLRS	O. lupi female	0	0	0	0
16	23	AKHTVKDLEDRLRSL	O. lupi female	0	0	0	0
16	24	KHTVKDLEDRLRSLE	O. lupi female	133.5	64.5	0.483146	0
16	25	HTVKDLEDRLRSLEQ	O. lupi female	37	37	1	0
16	26	TVKDLEDRLRSLEQE	O. lupi female	0	0	0	0
16	27	VKDLEDRLRSLEQEK	O. lupi female	0	0	0	0
16	28	KDLEDRLRSLEQEKA	O. lupi female	206.5	206.5	1	0
16	29	DLEDRLRSLEQEKAS	O. lupi female	0	0	0	0
16	30	LEDRLRSLEQEKASI	O. lupi female	270	46	0.17037	270
16	31	EDRLRSLEQEKASID	O. lupi female	0	0	0	0
16	32	DRLRSLEQEKASIDS	O. lupi female	0	0	0	0
16	33	RLRSLEQEKASIDSA	O. lupi female	6503.5	860.5	0.132313	6503.5
16	34	LRSLEQEKASIDSAR	O. lupi female	2154.5	897.5	0.41657	2154.5
16	35	RSLEQEKASIDSARH	O. lupi female	917	162	0.176663	917
16	36	SLEQEKASIDSARHH	O. lupi female	552	510	0.923913	0
16	37	LEQEKASIDSARHHL	O. lupi female	661.5	529.5	0.800454	0
16	38	EQEKASIDSARHHLE	O. lupi female	0	0	0	0
16	39	QEKASIDSARHHLED	O. lupi female	243.5	115.5	0.474333	0
16	40	EKASIDSARHHLEDE	O. lupi female	120	2	0.0166667	120
16	41	KASIDSARHHLEDEI	O. lupi female	103.5	103.5	1	0
16	42	ASIDSARHHLEDEIR	O. lupi female	518.5	2.5	0.0048216	518.5
16	43	SIDSARHHLEDEIRK	O. lupi female	31	31	1	0
16	44	IDSARHHLEDEIRKM	O. lupi female	335	335	1	0
16	45	DSARHHLEDEIRKMR	O. lupi female	2513.5	1701.5	0.676944	0
16	46	SARHHLEDEIRKMRE	O. lupi female	1124	157	0.13968	1124
16	47	ARHHLEDEIRKMREQ	O. lupi female	538.5	538.5	1	0
16	48	RHHLEDEIRKMREQF	O. lupi female	4150	726	0.17494	4150
16	49	HHLEDEIRKMREQFN	O. lupi female	1290.5	113.5	0.0879504	1290.5
16	50	HLEDEIRKMREQFNS	O. lupi female	16.5	16.5	1	0
16	51	LEDEIRKMREQFNST	O. lupi female	282	282	1	0
16	52	EDEIRKMREQFNSTL	O. lupi female	98.5	98.5	1	0
16	53	DEIRKMREQFNSTLL	O. lupi female	116	116	1	0
16	54	EIRKMREQFNSTLLD	O. lupi female	0	0	0	0
16	55	IRKMREQFNSTLLDV	O. lupi female	763.5	567.5	0.743287	0
16	56	RKMREQFNSTLLDVE	O. lupi female	325.5	16.5	0.0506912	325.5
16	57	KMREQFNSTLLDVER	O. lupi female	1074	332	0.309125	1074
16	58	MREQFNSTLLDVERR	O. lupi female	847	255	0.301063	847
16	59	REQFNSTLLDVERRA	O. lupi female	267	267	1	0
16	60	EQFNSTLLDVERRAA	O. lupi female	0	0	0	0
16	61	QFNSTLLDVERRAAE	O. lupi female	0	0	0	0
16	62	FNSTLLDVERRAAED	O. lupi female	0	0	0	0
16	63	NSTLLDVERRAAEDA	O. lupi female	0	0	0	0
16	64	STLLDVERRAAEDAD	O. lupi female	81	81	1	0
16	65	TLLDVERRAAEDADE	O. lupi female	0	0	0	0
16	66	LLDVERRAAEDADER	O. lupi female	89	25	0.280899	89
16	67	LDVERRAAEDADERI	O. lupi female	191.5	40.5	0.211488	191.5
18	2	DVERRAAEDADERIR	O. lupi female	581	69	0.118761	581
18	3	VERRAAEDADERIRK	O. lupi female	236.5	236.5	1	0
18	4	ERRAAEDADERIRKI	O. lupi female	0	0	0	0
18	5	RRAAEDADERIRKID	O. lupi female	0	0	0	0
18	6	RAAEDADERIRKIDE	O. lupi female	0	0	0	0
18	7	AAEDADERIRKIDEE	O. lupi female	0	0	0	0
18	8	AEDADERIRKIDEET	O. lupi female	0	0	0	0
18	9	EDADERIRKIDEETK	O. lupi female	0	0	0	0
18	10	DADERIRKIDEETKI	O. lupi female	7	7	1	0
18	11	ADERIRKIDEETKIR	O. lupi female	0	0	0	0
18	12	DERIRKIDEETKIRI	O. lupi female	539	539	1	0
18	13	ERIRKIDEETKIRIS	O. lupi female	0	0	0	0
18	14	RIRKIDEETKIRISE	O. lupi female	51	51	1	0
18	15	IRKIDEETKIRISEL	O. lupi female	40	40	1	0
18	16	RKIDEETKIRISELT	O. lupi female	0	0	0	0
18	17	KIDEETKIRISELTN	O. lupi female	0	0	0	0
18	18	IDEETKIRISELTNR	O. lupi female	1520	1306	0.859211	0
18	19	DEETKIRISELTNRI	O. lupi female	0	0	0	0
18	20	EETKIRISELTNRIE	O. lupi female	17	17	1	0
18	21	ETKIRISELTNRIEM	O. lupi female	0	0	0	0
18	22	TKIRISELTNRIEML	O. lupi female	474	342	0.721519	0
18	23	KIRISELTNRIEMLL	O. lupi female	106	106	1	0
18	24	IRISELTNRIEMLLE	O. lupi female	548	196	0.357664	548
18	25	RISELTNRIEMLLEE	O. lupi female	911	115	0.126235	911
18	26	ISELTNRIEMLLEEN	O. lupi female	761.5	74.5	0.0978332	761.5
18	27	SELTNRIEMLLEENK	O. lupi female	113	113	1	0
18	28	ELTNRIEMLLEENKR	O. lupi female	118	118	1	0
18	29	LTNRIEMLLEENKRL	O. lupi female	413	137	0.331719	413
18	30	TNRIEMLLEENKRLK	O. lupi female	1306	1094	0.837672	0
18	31	NRIEMLLEENKRLKD	O. lupi female	616.5	556.5	0.902676	0
18	32	RIEMLLEENKRLKDE	O. lupi female	105	105	1	0
18	33	IEMLLEENKRLKDEA	O. lupi female	797.5	448.5	0.562382	0
18	34	EMLLEENKRLKDEAD	O. lupi female	57	57	1	0
18	35	MLLEENKRLKDEADG	O. lupi female	0	0	0	0
18	36	LLEENKRLKDEADGM	O. lupi female	0	0	0	0
18	37	LEENKRLKDEADGMK	O. lupi female	1118	146	0.13059	1118
18	38	EENKRLKDEADGMKN	O. lupi female	59	59	1	0
18	39	ENKRLKDEADGMKNR	O. lupi female	16	13	0.8125	0
18	40	NKRLKDEADGMKNRI	O. lupi female	169	169	1	0
18	41	KRLKDEADGMKNRIQ	O. lupi female	90	90	1	0
18	42	RLKDEADGMKNRIQD	O. lupi female	0	0	0	0
18	43	LKDEADGMKNRIQDI	O. lupi female	0	0	0	0
18	44	KDEADGMKNRIQDIE	O. lupi female	0	0	0	0
18	45	DEADGMKNRIQDIEK	O. lupi female	0	0	0	0
18	46	EADGMKNRIQDIEKE	O. lupi female	0	0	0	0
18	47	ADGMKNRIQDIEKEY	O. lupi female	0	0	0	0
18	48	DGMKNRIQDIEKEYN	O. lupi female	0	0	0	0
18	49	GMKNRIQDIEKEYNT	O. lupi female	0	0	0	0
18	50	MKNRIQDIEKEYNTI	O. lupi female	31	31	1	0
18	51	KNRIQDIEKEYNTII	O. lupi female	107.5	107.5	1	0
18	52	NRIQDIEKEYNTIIR	O. lupi female	0	0	0	0
18	53	RIQDIEKEYNTIIRK	O. lupi female	0	0	0	0
18	54	IQDIEKEYNTIIRKL	O. lupi female	324	324	1	0
18	55	QDIEKEYNTIIRKLE	O. lupi female	380	380	1	0
18	56	DIEKEYNTIIRKLEE	O. lupi female	404.5	263.5	0.651422	0
18	57	IEKEYNTIIRKLEEK	O. lupi female	140	140	1	0
18	58	EKEYNTIIRKLEEKD	O. lupi female	438	120	0.273973	438
18	59	KEYNTIIRKLEEKDN	O. lupi female	778.5	401.5	0.515735	0
18	60	EYNTIIRKLEEKDNA	O. lupi female	278.5	80.5	0.289048	278.5
18	61	YNTIIRKLEEKDNAL	O. lupi female	629	202	0.321145	629
18	62	NTIIRKLEEKDNALK	O. lupi female	11	11	1	0
18	63	TIIRKLEEKDNALKN	O. lupi female	65	65	1	0
18	64	IIRKLEEKDNALKNL	O. lupi female	0	0	0	0
18	65	IRKLEEKDNALKNLE	O. lupi female	980	8	0.00816327	980
18	66	RKLEEKDNALKNLEN	O. lupi female	229	149	0.650655	0
18	67	KLEEKDNALKNLENI	O. lupi female	97.5	58.5	0.6	0
20	2	LEEKDNALKNLENIR	O. lupi female	3004	1630	0.54261	0
20	3	EEKDNALKNLENIRQ	O. lupi female	0	0	0	0
20	4	EKDNALKNLENIRQR	O. lupi female	136.5	20.5	0.150183	136.5
20	5	KDNALKNLENIRQRL	O. lupi female	292	71	0.243151	292
20	6	DNALKNLENIRQRLV	O. lupi female	183	15	0.0819672	183
20	7	NALKNLENIRQRLVN	O. lupi female	0	0	0	0
20	8	ALKNLENIRQRLVNE	O. lupi female	724	120	0.165746	724
20	9	LKNLENIRQRLVNEL	O. lupi female	152	152	1	0
20	10	KNLENIRQRLVNELE	O. lupi female	0	0	0	0
20	11	NLENIRQRLVNELEE	O. lupi female	1094.5	452.5	0.413431	0
20	12	LENIRQRLVNELEEQ	O. lupi female	848.5	439.5	0.517973	0
20	13	ENIRQRLVNELEEQR	O. lupi female	1137	467	0.41073	0
20	14	NIRQRLVNELEEQRT	O. lupi female	206.5	98.5	0.476998	0
20	15	IRQRLVNELEEQRTR	O. lupi female	1099	187	0.170155	1099
20	16	RQRLVNELEEQRTRF	O. lupi female	3789	355	0.0936923	3789
20	17	QRLVNELEEQRTRFD	O. lupi female	1981.5	866.5	0.437295	0
20	18	RLVNELEEQRTRFDT	O. lupi female	9	9	1	0
20	19	LVNELEEQRTRFDTM	O. lupi female	618	124	0.200647	618
20	20	VNELEEQRTRFDTMT	O. lupi female	2277	1059	0.465086	0
20	21	NELEEQRTRFDTMTS	O. lupi female	88.5	45.5	0.514124	0
20	22	ELEEQRTRFDTMTSE	O. lupi female	1020	1020	1	0
20	23	LEEQRTRFDTMTSEF	O. lupi female	3621	635	0.175366	3621
20	24	EEQRTRFDTMTSEFD	O. lupi female	0	0	0	0
20	25	EQRTRFDTMTSEFDN	O. lupi female	269.5	260.5	0.966605	0
20	26	QRTRFDTMTSEFDNL	O. lupi female	123.5	45.5	0.368421	123.5
20	27	RTRFDTMTSEFDNLR	O. lupi female	444.5	2.5	0.0056243	444.5
20	28	TRFDTMTSEFDNLRT	O. lupi female	27	27	1	0
20	29	RFDTMTSEFDNLRTN	O. lupi female	0	0	0	0
20	30	FDTMTSEFDNLRTNY	O. lupi female	855.5	120.5	0.140853	855.5
20	31	DTMTSEFDNLRTNYD	O. lupi female	270.5	270.5	1	0
20	32	TMTSEFDNLRTNYDS	O. lupi female	0	0	0	0
20	33	MTSEFDNLRTNYDSA	O. lupi female	0	0	0	0
20	34	TSEFDNLRTNYDSAN	O. lupi female	13	13	1	0
20	35	SEFDNLRTNYDSANK	O. lupi female	23	23	1	0
20	36	EFDNLRTNYDSANKN	O. lupi female	0	0	0	0
20	37	FDNLRTNYDSANKNT	O. lupi female	0	0	0	0
20	38	DNLRTNYDSANKNTV	O. lupi female	0	0	0	0
20	39	NLRTNYDSANKNTVA	O. lupi female	0	0	0	0
20	40	LRTNYDSANKNTVAI	O. lupi female	0	0	0	0
20	41	RTNYDSANKNTVAIE	O. lupi female	305.5	305.5	1	0
20	42	TNYDSANKNTVAIEL	O. lupi female	4	4	1	0
20	43	NYDSANKNTVAIELT	O. lupi female	61	49	0.803279	0
20	44	YDSANKNTVAIELTV	O. lupi female	0	0	0	0
20	45	DSANKNTVAIELTVK	O. lupi female	88.5	88.5	1	0
20	46	SANKNTVAIELTVKE	O. lupi female	157	157	1	0
20	47	ANKNTVAIELTVKEI	O. lupi female	0	0	0	0
20	48	NKNTVAIELTVKEIK	O. lupi female	0	0	0	0
20	49	KNTVAIELTVKEIKQ	O. lupi female	0	0	0	0
20	50	NTVAIELTVKEIKQQ	O. lupi female	0	0	0	0
20	51	TVAIELTVKEIKQQR	O. lupi female	0	0	0	0
20	52	VAIELTVKEIKQQRD	O. lupi female	0	0	0	0
20	53	AIELTVKEIKQQRDE	O. lupi female	0	0	0	0
20	54	IELTVKEIKQQRDEI	O. lupi female	0	0	0	0
20	55	ELTVKEIKQQRDEII	O. lupi female	235	235	1	0
20	56	LTVKEIKQQRDEIIK	O. lupi female	66.5	66.5	1	0
20	57	TVKEIKQQRDEIIKQ	O. lupi female	0	0	0	0
20	58	VKEIKQQRDEIIKQK	O. lupi female	0	0	0	0
20	59	KEIKQQRDEIIKQKD	O. lupi female	127	127	1	0
20	60	EIKQQRDEIIKQKDK	O. lupi female	147	147	1	0
20	61	IKQQRDEIIKQKDKL	O. lupi female	0	0	0	0
20	62	KQQRDEIIKQKDKLV	O. lupi female	101	101	1	0
20	63	QQRDEIIKQKDKLVK	O. lupi female	24	24	1	0
20	64	QRDEIIKQKDKLVKE	O. lupi female	359	183	0.509749	0
20	65	RDEIIKQKDKLVKEL	O. lupi female	0	0	0	0
20	66	DEIIKQKDKLVKELA	O. lupi female	0	0	0	0
20	67	EIIKQKDKLVKELAD	O. lupi female	0	0	0	0
22	2	IIKQKDKLVKELADL	O. lupi female	0	0	0	0
22	3	IKQKDKLVKELADLE	O. lupi female	0	0	0	0
22	4	KQKDKLVKELADLEN	O. lupi female	0	0	0	0
22	5	QKDKLVKELADLENK	O. lupi female	0	0	0	0
22	6	KDKLVKELADLENKL	O. lupi female	0	0	0	0
22	7	DKLVKELADLENKLN	O. lupi female	207	207	1	0
22	8	KLVKELADLENKLNN	O. lupi female	419	67	0.159905	419
22	9	LVKELADLENKLNNE	O. lupi female	5	5	1	0
22	10	VKELADLENKLNNET	O. lupi female	0	0	0	0
22	11	KELADLENKLNNETK	O. lupi female	183	183	1	0
22	12	ELADLENKLNNETKM	O. lupi female	1012.5	43.5	0.042963	1012.5
22	13	LADLENKLNNETKMR	O. lupi female	463.5	248.5	0.536138	0
22	14	ADLENKLNNETKMRG	O. lupi female	578	408	0.705882	0
22	15	DLENKLNNETKMRGD	O. lupi female	269	269	1	0
22	16	LENKLNNETKMRGDV	O. lupi female	0	0	0	0
22	17	ENKLNNETKMRGDVE	O. lupi female	0	0	0	0
22	18	NKLNNETKMRGDVEK	O. lupi female	0	0	0	0
22	19	KLNNETKMRGDVEKL	O. lupi female	263	263	1	0
22	20	LNNETKMRGDVEKLN	O. lupi female	0	0	0	0
22	21	NNETKMRGDVEKLNQ	O. lupi female	407.5	122.5	0.300613	407.5
22	22	NETKMRGDVEKLNQR	O. lupi female	357	357	1	0
22	23	ETKMRGDVEKLNQRH	O. lupi female	783.5	715.5	0.91321	0
22	24	TKMRGDVEKLNQRHL	O. lupi female	927.5	448.5	0.483558	0
22	25	KMRGDVEKLNQRHLD	O. lupi female	1568	484	0.308673	1568
22	26	MRGDVEKLNQRHLDE	O. lupi female	0	0	0	0
22	27	RGDVEKLNQRHLDEI	O. lupi female	234.5	234.5	1	0
22	28	GDVEKLNQRHLDEID	O. lupi female	539	127	0.235622	539
22	29	DVEKLNQRHLDEIDN	O. lupi female	301	3	0.00996678	301
22	30	VEKLNQRHLDEIDNF	O. lupi female	908.5	494.5	0.544304	0
22	31	EKLNQRHLDEIDNFK	O. lupi female	0	0	0	0
22	32	KLNQRHLDEIDNFKK	O. lupi female	0	0	0	0
22	33	LNQRHLDEIDNFKKQ	O. lupi female	377	89	0.236074	377
22	34	NQRHLDEIDNFKKQI	O. lupi female	766	146	0.190601	766
22	35	QRHLDEIDNFKKQIN	O. lupi female	323	69	0.213622	323
22	36	RHLDEIDNFKKQINE	O. lupi female	1108	620	0.559567	0
22	37	HLDEIDNFKKQINEY	O. lupi female	1308.5	2.5	0.00191058	1308.5
22	38	LDEIDNFKKQINEYI	O. lupi female	412	221	0.536408	0
22	39	DEIDNFKKQINEYIT	O. lupi female	27	27	1	0
22	40	EIDNFKKQINEYITE	O. lupi female	0	0	0	0
22	41	IDNFKKQINEYITEV	O. lupi female	100.5	100.5	1	0
22	42	DNFKKQINEYITEVT	O. lupi female	0	0	0	0
22	43	NFKKQINEYITEVTT	O. lupi female	0	0	0	0
22	44	FKKQINEYITEVTTI	O. lupi female	0	0	0	0
22	45	KKQINEYITEVTTIR	O. lupi female	178.5	178.5	1	0
22	46	KQINEYITEVTTIRR	O. lupi female	456	116	0.254386	456
22	47	QINEYITEVTTIRRQ	O. lupi female	251	251	1	0
22	48	INEYITEVTTIRRQN	O. lupi female	1340.5	1340.5	1	0
22	49	NEYITEVTTIRRQND	O. lupi female	0	0	0	0
22	50	EYITEVTTIRRQNDD	O. lupi female	94.5	94.5	1	0
22	51	YITEVTTIRRQNDDF	O. lupi female	1511	83	0.0549305	1511
22	52	ITEVTTIRRQNDDFD	O. lupi female	144	144	1	0
22	53	TEVTTIRRQNDDFDT	O. lupi female	0	0	0	0
22	54	EVTTIRRQNDDFDTQ	O. lupi female	0	0	0	0
22	55	VTTIRRQNDDFDTQM	O. lupi female	325	41	0.126154	325
22	56	TTIRRQNDDFDTQMK	O. lupi female	1379.5	872.5	0.632476	0
22	57	TIRRQNDDFDTQMKT	O. lupi female	2826	554	0.196037	2826
22	58	IRRQNDDFDTQMKTN	O. lupi female	6536	646	0.0988372	6536
22	59	RRQNDDFDTQMKTNQ	O. lupi female	369	13	0.0352304	369
22	60	RQNDDFDTQMKTNQA	O. lupi female	43	43	1	0
22	61	QNDDFDTQMKTNQAK	O. lupi female	207	63	0.304348	207
22	62	NDDFDTQMKTNQAKL	O. lupi female	322	322	1	0
22	63	DDFDTQMKTNQAKLS	O. lupi female	0	0	0	0
22	64	DFDTQMKTNQAKLSS	O. lupi female	87	87	1	0
22	65	FDTQMKTNQAKLSSM	O. lupi female	396	113	0.285354	396
22	66	DTQMKTNQAKLSSME	O. lupi female	1341.5	337.5	0.251584	1341.5
22	67	TQMKTNQAKLSSMEN	O. lupi female	119	119	1	0
24	2	QMKTNQAKLSSMENS	O. lupi female	2704.5	548.5	0.20281	2704.5
24	3	MKTNQAKLSSMENSL	O. lupi female	2107	37	0.0175605	2107
24	4	KTNQAKLSSMENSLI	O. lupi female	0	0	0	0
24	5	TNQAKLSSMENSLIA	O. lupi female	0	0	0	0
24	6	NQAKLSSMENSLIAA	O. lupi female	533	533	1	0
24	7	QAKLSSMENSLIAAK	O. lupi female	56	56	1	0
24	8	AKLSSMENSLIAAKK	O. lupi female	0	0	0	0
24	9	KLSSMENSLIAAKKE	O. lupi female	0	0	0	0
24	10	LSSMENSLIAAKKEI	O. lupi female	107	107	1	0
24	11	SSMENSLIAAKKEIE	O. lupi female	15	15	1	0
24	12	SMENSLIAAKKEIEK	O. lupi female	390	380	0.974359	0
24	13	MENSLIAAKKEIEKL	O. lupi female	0	0	0	0
24	14	ENSLIAAKKEIEKLS	O. lupi female	192	192	1	0
24	15	NSLIAAKKEIEKLSE	O. lupi female	228	228	1	0
24	16	SLIAAKKEIEKLSEM	O. lupi female	456	456	1	0
24	17	LIAAKKEIEKLSEMN	O. lupi female	453	453	1	0
24	18	IAAKKEIEKLSEMNN	O. lupi female	189.5	189.5	1	0
24	19	AAKKEIEKLSEMNNR	O. lupi female	0	0	0	0
24	20	AKKEIEKLSEMNNRL	O. lupi female	52	52	1	0
24	21	KKEIEKLSEMNNRLQ	O. lupi female	94.5	94.5	1	0
24	22	KEIEKLSEMNNRLQQ	O. lupi female	370	370	1	0
24	23	EIEKLSEMNNRLQQD	O. lupi female	0	0	0	0
24	24	IEKLSEMNNRLQQDK	O. lupi female	279	279	1	0
24	25	EKLSEMNNRLQQDKN	O. lupi female	0	0	0	0
24	26	KLSEMNNRLQQDKND	O. lupi female	46	46	1	0
24	27	LSEMNNRLQQDKNDL	O. lupi female	1589	331	0.208307	1589
24	28	SEMNNRLQQDKNDLI	O. lupi female	0	0	0	0
24	29	EMNNRLQQDKNDLIG	O. lupi female	748	564	0.754011	0
24	30	MNNRLQQDKNDLIGA	O. lupi female	0	0	0	0
24	31	NNRLQQDKNDLIGAK	O. lupi female	38.5	38.5	1	0
24	32	NRLQQDKNDLIGAKQ	O. lupi female	0	0	0	0
24	33	RLQQDKNDLIGAKQK	O. lupi female	0	0	0	0
24	34	LQQDKNDLIGAKQKG	O. lupi female	39.5	39.5	1	0
24	35	QQDKNDLIGAKQKGD	O. lupi female	0	0	0	0
24	36	QDKNDLIGAKQKGDT	O. lupi female	0	0	0	0
24	37	DKNDLIGAKQKGDTE	O. lupi female	0	0	0	0
24	38	KNDLIGAKQKGDTEL	O. lupi female	0	0	0	0
24	39	NDLIGAKQKGDTELN	O. lupi female	359	23	0.0640669	359
24	40	DLIGAKQKGDTELNL	O. lupi female	130	130	1	0
24	41	LIGAKQKGDTELNLL	O. lupi female	0	0	0	0
24	42	IGAKQKGDTELNLLN	O. lupi female	0	0	0	0
24	43	GAKQKGDTELNLLNE	O. lupi female	104	104	1	0
24	44	AKQKGDTELNLLNEK	O. lupi female	421	401	0.952494	0
24	45	KQKGDTELNLLNEKI	O. lupi female	146	146	1	0
24	46	QKGDTELNLLNEKIR	O. lupi female	122.5	55.5	0.453061	0
24	47	KGDTELNLLNEKIRK	O. lupi female	0	0	0	0
24	48	GDTELNLLNEKIRKV	O. lupi female	0	0	0	0
24	49	DTELNLLNEKIRKVE	O. lupi female	1728	284	0.164352	1728
24	50	TELNLLNEKIRKVEL	O. lupi female	1097	43	0.0391978	1097
24	51	ELNLLNEKIRKVELE	O. lupi female	479.5	57.5	0.119917	479.5
24	52	LNLLNEKIRKVELEF	O. lupi female	2687	367	0.136584	2687
24	53	NLLNEKIRKVELEFE	O. lupi female	4386	664	0.151391	4386
24	54	LLNEKIRKVELEFER	O. lupi female	2407	875	0.363523	2407
24	55	LNEKIRKVELEFERI	O. lupi female	2935.5	1039.5	0.354113	2935.5
24	56	NEKIRKVELEFERIK	O. lupi female	0	0	0	0
24	57	EKIRKVELEFERIKK	O. lupi female	391	391	1	0
24	58	KIRKVELEFERIKKD	O. lupi female	0	0	0	0
24	59	IRKVELEFERIKKDN	O. lupi female	444	444	1	0
24	60	RKVELEFERIKKDNQ	O. lupi female	98.5	79.5	0.807107	0
24	61	KVELEFERIKKDNQE	O. lupi female	0	0	0	0
24	62	VELEFERIKKDNQEL	O. lupi female	67	67	1	0
24	63	ELEFERIKKDNQELE	O. lupi female	0	0	0	0
24	64	LEFERIKKDNQELED	O. lupi female	549	527	0.959927	0
24	65	EFERIKKDNQELEDH	O. lupi female	166	115	0.692771	0
24	66	FERIKKDNQELEDHE	O. lupi female	0	0	0	0
24	67	ERIKKDNQELEDHER	O. lupi female	246	107	0.434959	0
26	2	RIKKDNQELEDHERT	O. lupi female	385.5	90.5	0.23476	385.5
26	3	IKKDNQELEDHERTA	O. lupi female	0	0	0	0
26	4	KKDNQELEDHERTAR	O. lupi female	295.5	191.5	0.648054	0
26	5	KDNQELEDHERTARD	O. lupi female	421	119	0.28266	421
26	6	DNQELEDHERTARDD	O. lupi female	177	73	0.412429	0
26	7	NQELEDHERTARDDL	O. lupi female	589.5	316.5	0.536896	0
26	8	QELEDHERTARDDLK	O. lupi female	751.5	284.5	0.378576	751.5
26	9	ELEDHERTARDDLKQ	O. lupi female	227	207	0.911894	0
26	10	LEDHERTARDDLKQE	O. lupi female	29	29	1	0
26	11	EDHERTARDDLKQET	O. lupi female	0	0	0	0
26	12	DHERTARDDLKQETN	O. lupi female	0	0	0	0
26	13	HERTARDDLKQETNR	O. lupi female	99	79	0.79798	0
26	14	ERTARDDLKQETNRN	O. lupi female	281	203	0.72242	0
26	15	RTARDDLKQETNRNH	O. lupi female	562	308	0.548043	0
26	16	TARDDLKQETNRNHL	O. lupi female	393.5	101.5	0.257942	393.5
26	17	ARDDLKQETNRNHLL	O. lupi female	304.5	222.5	0.730706	0
26	18	RDDLKQETNRNHLLT	O. lupi female	0	0	0	0
26	19	DDLKQETNRNHLLTK	O. lupi female	364.5	24.5	0.0672154	364.5
26	20	DLKQETNRNHLLTKE	O. lupi female	708	270	0.381356	708
26	21	LKQETNRNHLLTKEL	O. lupi female	993	525	0.528701	0
26	22	KQETNRNHLLTKELE	O. lupi female	0	0	0	0
26	23	QETNRNHLLTKELEE	O. lupi female	41	41	1	0
26	24	ETNRNHLLTKELEEA	O. lupi female	599.5	262.5	0.437865	0
26	25	TNRNHLLTKELEEAR	O. lupi female	747.5	71.5	0.0956522	747.5
26	26	NRNHLLTKELEEARA	O. lupi female	0	0	0	0
26	27	RNHLLTKELEEARAD	O. lupi female	273	273	1	0
26	28	NHLLTKELEEARADI	O. lupi female	300	130	0.433333	0
26	29	HLLTKELEEARADIV	O. lupi female	713	141	0.197756	713
26	30	LLTKELEEARADIVA	O. lupi female	509	277	0.544204	0
26	31	LTKELEEARADIVAL	O. lupi female	103.5	69.5	0.671498	0
26	32	TKELEEARADIVALN	O. lupi female	102	102	1	0
26	33	KELEEARADIVALND	O. lupi female	0	0	0	0
26	34	ELEEARADIVALNDR	O. lupi female	553.5	187.5	0.338753	553.5
26	35	LEEARADIVALNDRL	O. lupi female	11.5	11.5	1	0
26	36	EEARADIVALNDRLA	O. lupi female	226.5	226.5	1	0
26	37	EARADIVALNDRLAK	O. lupi female	0	0	0	0
26	38	ARADIVALNDRLAKM	O. lupi female	2	2	1	0
26	39	RADIVALNDRLAKMD	O. lupi female	337.5	337.5	1	0
26	40	ADIVALNDRLAKMDA	O. lupi female	1003	1003	1	0
26	41	DIVALNDRLAKMDAN	O. lupi female	221	221	1	0
26	42	IVALNDRLAKMDANF	O. lupi female	2021	1023	0.506185	0
26	43	VALNDRLAKMDANFK	O. lupi female	130.5	130.5	1	0
26	44	ALNDRLAKMDANFKI	O. lupi female	1059	557	0.525968	0
26	45	LNDRLAKMDANFKIK	O. lupi female	1444.5	627.5	0.434406	0
26	46	NDRLAKMDANFKIKL	O. lupi female	785	131	0.166879	0
26	47	DRLAKMDANFKIKLD	O. lupi female	1073	65	0.0605778	0
26	48	RLAKMDANFKIKLDE	O. lupi female	1648.5	223.5	0.135578	0
26	49	LAKMDANFKIKLDET	O. lupi female	1922	118	0.0613944	0
26	50	AKMDANFKIKLDETV	O. lupi female	409	409	1	0
26	51	KMDANFKIKLDETVK	O. lupi female	2029	65	0.0320355	0
26	52	MDANFKIKLDETVKK	O. lupi female	0	0	0	0
26	53	DANFKIKLDETVKKS	O. lupi female	0	0	0	0
26	54	ANFKIKLDETVKKSS	O. lupi female	0	0	0	0
26	55	NFKIKLDETVKKSSA	O. lupi female	0	0	0	0
26	56	FKIKLDETVKKSSAD	O. lupi female	0	0	0	0
26	57	KIKLDETVKKSSADH	O. lupi female	0	0	0	0
26	58	IKLDETVKKSSADHE	O. lupi female	11	11	1	0
26	59	KLDETVKKSSADHET	O. lupi female	0	0	0	0
26	60	LDETVKKSSADHETI	O. lupi female	1225.5	678.5	0.553652	0
26	61	DETVKKSSADHETIK	O. lupi female	0	0	0	0
26	62	ETVKKSSADHETIKS	O. lupi female	0	0	0	0
26	63	TVKKSSADHETIKSR	O. lupi female	0	0	0	0
26	64	VKKSSADHETIKSRD	O. lupi female	0	0	0	0
26	65	KKSSADHETIKSRDS	O. lupi female	68	68	1	0
26	66	KSSADHETIKSRDSK	O. lupi female	16	16	1	0
26	67	SSADHETIKSRDSKS	O. lupi female	0	0	0	0
28	2	SADHETIKSRDSKSE	O. lupi female	0	0	0	0
28	3	ADHETIKSRDSKSEK	O. lupi female	159	131	0.823899	0
28	4	DHETIKSRDSKSEKI	O. lupi female	0	0	0	0
28	5	HETIKSRDSKSEKII	O. lupi female	1	1	1	0
28	6	ETIKSRDSKSEKIIV	O. lupi female	0	0	0	0
28	7	TIKSRDSKSEKIIVK	O. lupi female	0	0	0	0
28	8	IKSRDSKSEKIIVKH	O. lupi female	0	0	0	0
28	9	KSRDSKSEKIIVKHE	O. lupi female	0	0	0	0
28	10	SRDSKSEKIIVKHET	O. lupi female	0	0	0	0
28	11	RDSKSEKIIVKHETE	O. lupi female	165	165	1	0
28	12	DSKSEKIIVKHETEI	O. lupi female	0	0	0	0
28	13	SKSEKIIVKHETEIY	O. lupi female	0	0	0	0
28	14	KSEKIIVKHETEIYE	O. lupi female	359	173	0.481894	0
28	15	SEKIIVKHETEIYEV	O. lupi female	455	307	0.674725	0
28	16	EKIIVKHETEIYEVN	O. lupi female	0	0	0	0
28	17	KIIVKHETEIYEVNK	O. lupi female	129	129	1	0
28	18	IIVKHETEIYEVNKY	O. lupi female	0	0	0	0
28	19	IVKHETEIYEVNKYK	O. lupi female	0	0	0	0
28	20	VKHETEIYEVNKYKA	O. lupi female	401	244	0.608479	0
28	21	KHETEIYEVNKYKAE	O. lupi female	0	0	0	0
28	22	HETEIYEVNKYKAEL	O. lupi female	0	0	0	0
28	23	ETEIYEVNKYKAELE	O. lupi female	0	0	0	0
28	24	TEIYEVNKYKAELEK	O. lupi female	1224	108	0.0882353	1224
28	25	EIYEVNKYKAELEKL	O. lupi female	565.5	425.5	0.752431	0
28	26	IYEVNKYKAELEKLE	O. lupi female	153.5	153.5	1	0
28	27	YEVNKYKAELEKLES	O. lupi female	0	0	0	0
28	28	EVNKYKAELEKLESD	O. lupi female	850	314	0.369412	850
28	29	VNKYKAELEKLESDK	O. lupi female	630	630	1	0
28	30	NKYKAELEKLESDKD	O. lupi female	506.5	384.5	0.759131	0
28	31	KYKAELEKLESDKDD	O. lupi female	739.5	463.5	0.626775	0
28	32	YKAELEKLESDKDDL	O. lupi female	266	266	1	0
28	33	KAELEKLESDKDDLE	O. lupi female	11	11	1	0
28	34	AELEKLESDKDDLEK	O. lupi female	814	200	0.2457	814
28	35	ELEKLESDKDDLEKR	O. lupi female	246	246	1	0
28	36	LEKLESDKDDLEKRI	O. lupi female	790.5	88.5	0.111954	790.5
28	37	EKLESDKDDLEKRII	O. lupi female	0	0	0	0
28	38	KLESDKDDLEKRIIG	O. lupi female	235	235	1	0
28	39	LESDKDDLEKRIIGL	O. lupi female	73.5	73.5	1	0
28	40	ESDKDDLEKRIIGLQ	O. lupi female	0	0	0	0
28	41	SDKDDLEKRIIGLQD	O. lupi female	87	87	1	0
28	42	DKDDLEKRIIGLQDE	O. lupi female	395.5	395.5	1	0
28	43	KDDLEKRIIGLQDEL	O. lupi female	95	95	1	0
28	44	DDLEKRIIGLQDELN	O. lupi female	216.5	121.5	0.561201	0
28	45	DLEKRIIGLQDELNE	O. lupi female	17.5	17.5	1	0
28	46	LEKRIIGLQDELNEK	O. lupi female	1968.5	1432.5	0.727711	0
28	47	EKRIIGLQDELNEKD	O. lupi female	0	0	0	0
28	48	KRIIGLQDELNEKDR	O. lupi female	0	0	0	0
28	49	RIIGLQDELNEKDRD	O. lupi female	22	22	1	0
28	50	IIGLQDELNEKDRDN	O. lupi female	0	0	0	0
28	51	IGLQDELNEKDRDND	O. lupi female	0	0	0	0
28	52	GLQDELNEKDRDNDR	O. lupi female	1499	84	0.0560374	1499
28	53	LQDELNEKDRDNDRL	O. lupi female	527.5	129.5	0.245498	527.5
28	54	QDELNEKDRDNDRLN	O. lupi female	143	15	0.104895	143
28	55	DELNEKDRDNDRLNA	O. lupi female	39	39	1	0
28	56	ELNEKDRDNDRLNAE	O. lupi female	0	0	0	0
28	57	LNEKDRDNDRLNAEI	O. lupi female	1408	804	0.571023	0
28	58	NEKDRDNDRLNAEID	O. lupi female	0	0	0	0
28	59	EKDRDNDRLNAEIDD	O. lupi female	336.5	22.5	0.0668648	336.5
28	60	KDRDNDRLNAEIDDL	O. lupi female	251	205	0.816733	0
28	61	DRDNDRLNAEIDDLK	O. lupi female	1.5	1.5	1	0
28	62	RDNDRLNAEIDDLKR	O. lupi female	0	0	0	0
28	63	DNDRLNAEIDDLKRK	O. lupi female	0	0	0	0
28	64	NDRLNAEIDDLKRKL	O. lupi female	316.5	316.5	1	0
28	65	DRLNAEIDDLKRKLQ	O. lupi female	42.5	42.5	1	0
28	66	RLNAEIDDLKRKLQT	O. lupi female	0	0	0	0
28	67	LNAEIDDLKRKLQTE	O. lupi female	0	0	0	0
30	2	NAEIDDLKRKLQTEI	O. lupi female	0	0	0	0
30	3	AEIDDLKRKLQTEIE	O. lupi female	742	46	0.0619946	742
30	4	EIDDLKRKLQTEIEK	O. lupi female	0	0	0	0
30	5	IDDLKRKLQTEIEKV	O. lupi female	0	0	0	0
30	6	DDLKRKLQTEIEKVR	O. lupi female	508.5	215.5	0.423795	0
30	7	DLKRKLQTEIEKVRK	O. lupi female	555.5	295.5	0.531953	0
30	8	LKRKLQTEIEKVRKE	O. lupi female	106.5	106.5	1	0
30	9	KRKLQTEIEKVRKET	O. lupi female	0	0	0	0
30	10	RKLQTEIEKVRKETT	O. lupi female	0	0	0	0
30	11	KLQTEIEKVRKETTT	O. lupi female	0	0	0	0
30	12	LQTEIEKVRKETTTV	O. lupi female	110	110	1	0
30	13	QTEIEKVRKETTTVQ	O. lupi female	58	58	1	0
30	14	TEIEKVRKETTTVQE	O. lupi female	0	0	0	0
30	15	EIEKVRKETTTVQER	O. lupi female	120	120	1	0
30	16	IEKVRKETTTVQERY	O. lupi female	1758.5	308.5	0.175434	1758.5
30	17	EKVRKETTTVQERYH	O. lupi female	1355	322	0.237638	1355
30	18	KVRKETTTVQERYHI	O. lupi female	52	52	1	0
30	19	VRKETTTVQERYHIE	O. lupi female	232.5	62.5	0.268817	232.5
30	20	RKETTTVQERYHIEL	O. lupi female	647	647	1	0
30	21	KETTTVQERYHIELD	O. lupi female	148	148	1	0
30	22	ETTTVQERYHIELDE	O. lupi female	0	0	0	0
30	23	TTTVQERYHIELDEE	O. lupi female	80	80	1	0
30	24	TTVQERYHIELDEER	O. lupi female	574	574	1	0
30	25	TVQERYHIELDEERD	O. lupi female	0	0	0	0
30	26	VQERYHIELDEERDN	O. lupi female	588.5	157.5	0.26763	588.5
30	27	QERYHIELDEERDNH	O. lupi female	1192	54	0.045302	1192
30	28	ERYHIELDEERDNHQ	O. lupi female	247.5	242.5	0.979798	0
30	29	RYHIELDEERDNHQK	O. lupi female	24.5	24.5	1	0
30	30	YHIELDEERDNHQKK	O. lupi female	304	304	1	0
30	31	HIELDEERDNHQKKI	O. lupi female	152	152	1	0
30	32	IELDEERDNHQKKID	O. lupi female	0	0	0	0
30	33	ELDEERDNHQKKIDS	O. lupi female	0	0	0	0
30	34	LDEERDNHQKKIDSM	O. lupi female	188	188	1	0
30	35	DEERDNHQKKIDSMN	O. lupi female	71	71	1	0
30	36	EERDNHQKKIDSMNA	O. lupi female	0	0	0	0
30	37	ERDNHQKKIDSMNAL	O. lupi female	4.5	4.5	1	0
30	38	RDNHQKKIDSMNALI	O. lupi female	423	11	0.0260047	423
30	39	DNHQKKIDSMNALIE	O. lupi female	195.5	195.5	1	0
30	40	NHQKKIDSMNALIEE	O. lupi female	787.5	708.5	0.899683	0
30	41	HQKKIDSMNALIEEL	O. lupi female	1946.5	351.5	0.180581	1946.5
30	42	QKKIDSMNALIEELR	O. lupi female	993	256	0.257805	993
30	43	KKIDSMNALIEELRA	O. lupi female	289	165	0.570934	0
30	44	KIDSMNALIEELRAK	O. lupi female	954.5	350.5	0.367208	954.5
30	45	IDSMNALIEELRAKL	O. lupi female	936.5	936.5	1	0
30	46	DSMNALIEELRAKLS	O. lupi female	426	180	0.422535	0
30	47	SMNALIEELRAKLSD	O. lupi female	1153	619	0.53686	0
30	48	MNALIEELRAKLSDA	O. lupi female	163	163	1	0
30	49	NALIEELRAKLSDAE	O. lupi female	0	0	0	0
30	50	ALIEELRAKLSDAER	O. lupi female	648.5	1.5	0.00231303	648.5
30	51	LIEELRAKLSDAERA	O. lupi female	0	0	0	0
30	52	IEELRAKLSDAERAM	O. lupi female	798.5	28.5	0.0356919	798.5
30	53	EELRAKLSDAERAMA	O. lupi female	1761	575	0.326519	0
30	54	ELRAKLSDAERAMAD	O. lupi female	842	560	0.665083	0
30	55	LRAKLSDAERAMADL	O. lupi female	572.5	250.5	0.437555	0
30	56	RAKLSDAERAMADLQ	O. lupi female	174	168	0.965517	0
30	57	AKLSDAERAMADLQN	O. lupi female	0	0	0	0
30	58	KLSDAERAMADLQNR	O. lupi female	416	124	0.298077	416
30	59	LSDAERAMADLQNRD	O. lupi female	270.5	126.5	0.467652	0
30	60	SDAERAMADLQNRDS	O. lupi female	0	0	0	0
30	61	DAERAMADLQNRDSI	O. lupi female	473	177	0.374207	473
30	62	AERAMADLQNRDSIL	O. lupi female	25	9	0.36	25
30	63	ERAMADLQNRDSILE	O. lupi female	6213	13	0.00209239	6213
30	64	RAMADLQNRDSILER	O. lupi female	1491.5	2.5	0.00167616	1491.5
30	65	AMADLQNRDSILERE	O. lupi female	672	10	0.014881	672
30	66	MADLQNRDSILEREN	O. lupi female	477	85	0.178197	477
30	67	ADLQNRDSILERENT	O. lupi female	97	97	1	0
32	2	DLQNRDSILERENTD	O. lupi female	2037	172	0.0844379	2037
32	3	LQNRDSILERENTDW	O. lupi female	3934	364	0.0925267	3934
32	4	QNRDSILERENTDWK	O. lupi female	157.5	157.5	1	0
32	5	NRDSILERENTDWKE	O. lupi female	69	69	1	0
32	6	RDSILERENTDWKEK	O. lupi female	263.5	263.5	1	0
32	7	DSILERENTDWKEKS	O. lupi female	0	0	0	0
32	8	SILERENTDWKEKSD	O. lupi female	0	0	0	0
32	9	ILERENTDWKEKSDA	O. lupi female	0	0	0	0
32	10	LERENTDWKEKSDAL	O. lupi female	0	0	0	0
32	11	ERENTDWKEKSDALN	O. lupi female	121.5	121.5	1	0
32	12	RENTDWKEKSDALNM	O. lupi female	1662.5	1028.5	0.618647	0
32	13	ENTDWKEKSDALNME	O. lupi female	1711	385	0.225015	1711
32	14	NTDWKEKSDALNMEL	O. lupi female	930.5	76.5	0.0822139	930.5
32	15	TDWKEKSDALNMELD	O. lupi female	824	51	0.0618932	824
32	16	DWKEKSDALNMELDR	O. lupi female	1927	339	0.175921	1927
32	17	WKEKSDALNMELDRL	O. lupi female	818	462	0.564792	0
32	18	KEKSDALNMELDRLR	O. lupi female	613.5	412.5	0.672372	0
32	19	EKSDALNMELDRLRD	O. lupi female	1051	503	0.478592	0
32	20	KSDALNMELDRLRDE	O. lupi female	0	0	0	0
32	21	SDALNMELDRLRDEL	O. lupi female	753	493	0.654714	0
32	22	DALNMELDRLRDELL	O. lupi female	538	502	0.933086	0
32	23	ALNMELDRLRDELLS	O. lupi female	844	163	0.193128	844
32	24	LNMELDRLRDELLSV	O. lupi female	451	451	1	0
32	25	NMELDRLRDELLSVR	O. lupi female	618	220	0.355987	618
32	26	MELDRLRDELLSVRR	O. lupi female	641	151	0.235569	641
32	27	ELDRLRDELLSVRRD	O. lupi female	290	290	1	0
32	28	LDRLRDELLSVRRDA	O. lupi female	76.5	76.5	1	0
32	29	DRLRDELLSVRRDAE	O. lupi female	0	0	0	0
32	30	RLRDELLSVRRDAEK	O. lupi female	0	0	0	0
32	31	LRDELLSVRRDAEKE	O. lupi female	2118.5	508.5	0.240028	2118.5
32	32	RDELLSVRRDAEKEI	O. lupi female	17025	811	0.0476358	17025
32	33	DELLSVRRDAEKEIN	O. lupi female	0	0	0	0
32	34	ELLSVRRDAEKEINR	O. lupi female	225.5	1.5	0.00665188	225.5
32	35	LLSVRRDAEKEINRY	O. lupi female	1509.5	165.5	0.109639	1509.5
32	36	LSVRRDAEKEINRYN	O. lupi female	60	60	1	0
32	37	SVRRDAEKEINRYNT	O. lupi female	0	0	0	0
32	38	VRRDAEKEINRYNTD	O. lupi female	0	0	0	0
32	39	RRDAEKEINRYNTDL	O. lupi female	1431	849	0.593291	0
32	40	RDAEKEINRYNTDLQ	O. lupi female	0	0	0	0
32	41	DAEKEINRYNTDLQT	O. lupi female	0	0	0	0
32	42	AEKEINRYNTDLQTA	O. lupi female	0	0	0	0
32	43	EKEINRYNTDLQTAR	O. lupi female	179	179	1	0
32	44	KEINRYNTDLQTARN	O. lupi female	0	0	0	0
32	45	EINRYNTDLQTARNE	O. lupi female	0	0	0	0
32	46	INRYNTDLQTARNEI	O. lupi female	0	0	0	0
32	47	NRYNTDLQTARNEIK	O. lupi female	277	277	1	0
32	48	RYNTDLQTARNEIKL	O. lupi female	7	7	1	0
32	49	YNTDLQTARNEIKLL	O. lupi female	0	0	0	0
32	50	NTDLQTARNEIKLLT	O. lupi female	0	0	0	0
32	51	TDLQTARNEIKLLTS	O. lupi female	0	0	0	0
32	52	DLQTARNEIKLLTST	O. lupi female	138	106	0.768116	0
32	53	LQTARNEIKLLTSTN	O. lupi female	0	0	0	0
32	54	QTARNEIKLLTSTNN	O. lupi female	531.5	433.5	0.815616	0
32	55	TARNEIKLLTSTNNE	O. lupi female	61	61	1	0
32	56	ARNEIKLLTSTNNEM	O. lupi female	0	0	0	0
32	57	RNEIKLLTSTNNEMK	O. lupi female	681	681	1	0
32	58	NEIKLLTSTNNEMKS	O. lupi female	153	153	1	0
32	59	EIKLLTSTNNEMKSQ	O. lupi female	321	321	1	0
32	60	IKLLTSTNNEMKSQL	O. lupi female	0	0	0	0
32	61	KLLTSTNNEMKSQLN	O. lupi female	0	0	0	0
32	62	LLTSTNNEMKSQLNV	O. lupi female	301.5	199.5	0.661692	0
32	63	LTSTNNEMKSQLNVA	O. lupi female	0	0	0	0
32	64	TSTNNEMKSQLNVAE	O. lupi female	0	0	0	0
32	65	STNNEMKSQLNVAED	O. lupi female	0	0	0	0
32	66	TNNEMKSQLNVAEDK	O. lupi female	0	0	0	0
32	67	NNEMKSQLNVAEDKI	O. lupi female	0	0	0	0
34	2	NEMKSQLNVAEDKIN	O. lupi female	386	386	1	0
34	3	EMKSQLNVAEDKINS	O. lupi female	606	606	1	0
34	4	MKSQLNVAEDKINSL	O. lupi female	0	0	0	0
34	5	KSQLNVAEDKINSLN	O. lupi female	0	0	0	0
34	6	SQLNVAEDKINSLNK	O. lupi female	0	0	0	0
34	7	QLNVAEDKINSLNKV	O. lupi female	322	322	1	0
34	8	LNVAEDKINSLNKVI	O. lupi female	0	0	0	0
34	9	NVAEDKINSLNKVIT	O. lupi female	138	138	1	0
34	10	VAEDKINSLNKVITD	O. lupi female	90	90	1	0
34	11	AEDKINSLNKVITDQ	O. lupi female	87	87	1	0
34	12	EDKINSLNKVITDQQ	O. lupi female	173.5	173.5	1	0
34	13	DKINSLNKVITDQQN	O. lupi female	0	0	0	0
34	14	KINSLNKVITDQQNK	O. lupi female	0	0	0	0
34	15	INSLNKVITDQQNKI	O. lupi female	0	0	0	0
34	16	NSLNKVITDQQNKIR	O. lupi female	0	0	0	0
34	17	SLNKVITDQQNKIRD	O. lupi female	0	0	0	0
34	18	LNKVITDQQNKIRDL	O. lupi female	98.5	98.5	1	0
34	19	NKVITDQQNKIRDLT	O. lupi female	0	0	0	0
34	20	KVITDQQNKIRDLTG	O. lupi female	0	0	0	0
34	21	VITDQQNKIRDLTGE	O. lupi female	0	0	0	0
34	22	ITDQQNKIRDLTGEI	O. lupi female	0	0	0	0
34	23	TDQQNKIRDLTGEIR	O. lupi female	0	0	0	0
34	24	DQQNKIRDLTGEIRH	O. lupi female	324	119	0.367284	324
34	25	QQNKIRDLTGEIRHL	O. lupi female	0	0	0	0
34	26	QNKIRDLTGEIRHLE	O. lupi female	213	213	1	0
34	27	NKIRDLTGEIRHLEG	O. lupi female	24	24	1	0
34	28	KIRDLTGEIRHLEGE	O. lupi female	179	117	0.653631	0
34	29	IRDLTGEIRHLEGEL	O. lupi female	336.5	336.5	1	0
34	30	RDLTGEIRHLEGELK	O. lupi female	427	427	1	0
34	31	DLTGEIRHLEGELKD	O. lupi female	715	215	0.300699	715
34	32	LTGEIRHLEGELKDA	O. lupi female	0	0	0	0
34	33	TGEIRHLEGELKDAK	O. lupi female	87.5	87.5	1	0
34	34	GEIRHLEGELKDAKG	O. lupi female	0	0	0	0
34	35	EIRHLEGELKDAKGN	O. lupi female	121	95	0.785124	0
34	36	IRHLEGELKDAKGNV	O. lupi female	374.5	374.5	1	0
34	37	RHLEGELKDAKGNVA	O. lupi female	269	269	1	0
34	38	HLEGELKDAKGNVAN	O. lupi female	437	371	0.84897	0
34	39	LEGELKDAKGNVANL	O. lupi female	110	110	1	0
34	40	EGELKDAKGNVANLE	O. lupi female	15	15	1	0
34	41	GELKDAKGNVANLES	O. lupi female	279	213	0.763441	0
34	42	ELKDAKGNVANLESE	O. lupi female	964	188	0.195021	964
34	43	LKDAKGNVANLESEL	O. lupi female	667	165	0.247376	667
34	44	KDAKGNVANLESELD	O. lupi female	503	276	0.548708	0
34	45	DAKGNVANLESELDT	O. lupi female	209	209	1	0
34	46	AKGNVANLESELDTT	O. lupi female	0	0	0	0
34	47	KGNVANLESELDTTR	O. lupi female	241	241	1	0
34	48	GNVANLESELDTTRE	O. lupi female	647.5	33.5	0.0517375	647.5
34	49	NVANLESELDTTRER	O. lupi female	31	31	1	0
34	50	VANLESELDTTRERI	O. lupi female	298	298	1	0
34	51	ANLESELDTTRERIH	O. lupi female	255	63	0.247059	255
34	52	NLESELDTTRERIHL	O. lupi female	909.5	256.5	0.282023	909.5
34	53	LESELDTTRERIHLL	O. lupi female	417.5	356.5	0.853892	0
34	54	ESELDTTRERIHLLG	O. lupi female	0	0	0	0
34	55	SELDTTRERIHLLGE	O. lupi female	0	0	0	0
34	56	ELDTTRERIHLLGEQ	O. lupi female	33.5	33.5	1	0
34	57	LDTTRERIHLLGEQN	O. lupi female	9	9	1	0
34	58	DTTRERIHLLGEQNA	O. lupi female	4.5	4.5	1	0
34	59	TTRERIHLLGEQNAS	O. lupi female	0	0	0	0
34	60	TRERIHLLGEQNASL	O. lupi female	8	8	1	0
34	61	RERIHLLGEQNASLQ	O. lupi female	20	20	1	0
34	62	ERIHLLGEQNASLQT	O. lupi female	0	0	0	0
34	63	RIHLLGEQNASLQTE	O. lupi female	0	0	0	0
34	64	IHLLGEQNASLQTEL	O. lupi female	1986	374	0.188318	1986
34	65	HLLGEQNASLQTELN	O. lupi female	0	0	0	0
34	66	LLGEQNASLQTELNK	O. lupi female	0	0	0	0
34	67	LGEQNASLQTELNKI	O. lupi female	0	0	0	0
36	2	GEQNASLQTELNKIK	O. lupi female	184	184	1	0
36	3	EQNASLQTELNKIKG	O. lupi female	0	0	0	0
36	4	QNASLQTELNKIKGD	O. lupi female	103	103	1	0
36	5	NASLQTELNKIKGDI	O. lupi female	0	0	0	0
36	6	ASLQTELNKIKGDID	O. lupi female	3997	329	0.0823117	3997
36	7	SLQTELNKIKGDIDS	O. lupi female	2911	775	0.266232	2911
36	8	LQTELNKIKGDIDSL	O. lupi female	7717.5	712.5	0.0923226	7717.5
36	9	QTELNKIKGDIDSLL	O. lupi female	2303	255	0.110725	2303
36	10	TELNKIKGDIDSLLG	O. lupi female	1025	455	0.443902	1025
36	11	ELNKIKGDIDSLLGE	O. lupi female	822	93	0.113139	822
36	12	LNKIKGDIDSLLGEN	O. lupi female	872.5	468.5	0.536963	0
36	13	NKIKGDIDSLLGEND	O. lupi female	333.5	266.5	0.7991	0
36	14	KIKGDIDSLLGENDM	O. lupi female	1128	221	0.195922	1128
36	15	IKGDIDSLLGENDML	O. lupi female	1542	8	0.00518807	1542
36	16	KGDIDSLLGENDMLK	O. lupi female	314	314	1	0
36	17	GDIDSLLGENDMLKT	O. lupi female	0	0	0	0
36	18	DIDSLLGENDMLKTA	O. lupi female	0	0	0	0
36	19	IDSLLGENDMLKTAK	O. lupi female	115	115	1	0
36	20	DSLLGENDMLKTAKE	O. lupi female	0	0	0	0
36	21	SLLGENDMLKTAKES	O. lupi female	0	0	0	0
36	22	LLGENDMLKTAKESN	O. lupi female	0	0	0	0
36	23	LGENDMLKTAKESNE	O. lupi female	1414	2	0.00141443	1414
36	24	GENDMLKTAKESNEA	O. lupi female	0	0	0	0
36	25	ENDMLKTAKESNEAE	O. lupi female	70	70	1	0
36	26	NDMLKTAKESNEAEI	O. lupi female	206	206	1	0
36	27	DMLKTAKESNEAEID	O. lupi female	431.5	83.5	0.193511	431.5
36	28	MLKTAKESNEAEIDR	O. lupi female	218	218	1	0
36	29	LKTAKESNEAEIDRL	O. lupi female	0	0	0	0
36	30	KTAKESNEAEIDRLK	O. lupi female	0	0	0	0
36	31	TAKESNEAEIDRLKQ	O. lupi female	6.5	6.5	1	0
36	32	AKESNEAEIDRLKQK	O. lupi female	0	0	0	0
36	33	KESNEAEIDRLKQKL	O. lupi female	0	0	0	0
36	34	ESNEAEIDRLKQKLQ	O. lupi female	0	0	0	0
36	35	SNEAEIDRLKQKLQR	O. lupi female	0	0	0	0
36	36	NEAEIDRLKQKLQRS	O. lupi female	0	0	0	0
36	37	EAEIDRLKQKLQRSI	O. lupi female	64	64	1	0
36	38	AEIDRLKQKLQRSIE	O. lupi female	0	0	0	0
36	39	EIDRLKQKLQRSIEN	O. lupi female	19.5	19.5	1	0
36	40	IDRLKQKLQRSIENA	O. lupi female	0	0	0	0
36	41	DRLKQKLQRSIENAK	O. lupi female	0	0	0	0
36	42	RLKQKLQRSIENAKK	O. lupi female	0	0	0	0
36	43	LKQKLQRSIENAKKH	O. lupi female	0	0	0	0
36	44	KQKLQRSIENAKKHS	O. lupi female	13	13	1	0
36	45	QKLQRSIENAKKHSD	O. lupi female	0	0	0	0
36	46	KLQRSIENAKKHSDA	O. lupi female	110	110	1	0
36	47	LQRSIENAKKHSDAL	O. lupi female	0	0	0	0
36	48	QRSIENAKKHSDALD	O. lupi female	0	0	0	0
36	49	RSIENAKKHSDALDK	O. lupi female	0	0	0	0
36	50	SIENAKKHSDALDKL	O. lupi female	0	0	0	0
36	51	IENAKKHSDALDKLR	O. lupi female	0	0	0	0
36	52	ENAKKHSDALDKLRP	O. lupi female	0	0	0	0
36	53	NAKKHSDALDKLRPE	O. lupi female	290.5	290.5	1	0
36	54	AKKHSDALDKLRPEH	O. lupi female	0	0	0	0
36	55	KKHSDALDKLRPEHD	O. lupi female	0	0	0	0
36	56	KHSDALDKLRPEHDR	O. lupi female	378	378	1	0
36	57	HSDALDKLRPEHDRL	O. lupi female	259.5	26.5	0.102119	259.5
36	58	SDALDKLRPEHDRLQ	O. lupi female	0	0	0	0
36	59	DALDKLRPEHDRLQN	O. lupi female	0	0	0	0
36	60	ALDKLRPEHDRLQNL	O. lupi female	0	0	0	0
36	61	LDKLRPEHDRLQNLY	O. lupi female	157.5	157.5	1	0
36	62	DKLRPEHDRLQNLYR	O. lupi female	443	233	0.525959	0
36	63	KLRPEHDRLQNLYRE	O. lupi female	409	23	0.0562347	409
36	64	LRPEHDRLQNLYREK	O. lupi female	464.5	257.5	0.55436	0
36	65	RPEHDRLQNLYREKL	O. lupi female	105.5	105.5	1	0
36	66	PEHDRLQNLYREKLK	O. lupi female	0	0	0	0
36	67	EHDRLQNLYREKLKQ	O. lupi female	0	0	0	0
38	2	HDRLQNLYREKLKQS	O. lupi female	0	0	0	0
38	3	DRLQNLYREKLKQSE	O. lupi female	0	0	0	0
38	4	RLQNLYREKLKQSEN	O. lupi female	153	153	1	0
38	5	LQNLYREKLKQSENL	O. lupi female	0	0	0	0
38	6	QNLYREKLKQSENLT	O. lupi female	0	0	0	0
38	7	NLYREKLKQSENLTQ	O. lupi female	0	0	0	0
38	8	LYREKLKQSENLTQA	O. lupi female	0	0	0	0
38	9	YREKLKQSENLTQAI	O. lupi female	0	0	0	0
38	10	REKLKQSENLTQAIQ	O. lupi female	0	0	0	0
38	11	EKLKQSENLTQAIQD	O. lupi female	0	0	0	0
38	12	KLKQSENLTQAIQDL	O. lupi female	0	0	0	0
38	13	LKQSENLTQAIQDLE	O. lupi female	0	0	0	0
38	14	KQSENLTQAIQDLES	O. lupi female	0	0	0	0
38	15	QSENLTQAIQDLESR	O. lupi female	0	0	0	0
38	16	SENLTQAIQDLESRL	O. lupi female	771.5	170.5	0.220998	771.5
38	17	ENLTQAIQDLESRLN	O. lupi female	128	128	1	0
38	18	NLTQAIQDLESRLNQ	O. lupi female	0	0	0	0
38	19	LTQAIQDLESRLNQS	O. lupi female	0	0	0	0
38	20	TQAIQDLESRLNQSR	O. lupi female	97	97	1	0
38	21	QAIQDLESRLNQSRR	O. lupi female	1583	143	0.0903348	1583
38	22	AIQDLESRLNQSRRE	O. lupi female	1337	337	0.252057	1337
38	23	IQDLESRLNQSRREL	O. lupi female	1104	458	0.414855	1104
38	24	QDLESRLNQSRRELR	O. lupi female	1140	92	0.0807018	1140
38	25	DLESRLNQSRRELRD	O. lupi female	1556.5	479.5	0.308063	1556.5
38	26	LESRLNQSRRELRDA	O. lupi female	74	74	1	0
38	27	ESRLNQSRRELRDAT	O. lupi female	0	0	0	0
38	28	SRLNQSRRELRDATD	O. lupi female	41	41	1	0
38	29	RLNQSRRELRDATDK	O. lupi female	599	599	1	0
38	30	LNQSRRELRDATDKL	O. lupi female	121	121	1	0
38	31	NQSRRELRDATDKLI	O. lupi female	138	138	1	0
38	32	QSRRELRDATDKLIA	O. lupi female	0	0	0	0
38	33	SRRELRDATDKLIAS	O. lupi female	153.5	153.5	1	0
38	34	RRELRDATDKLIASE	O. lupi female	0	0	0	0
38	35	RELRDATDKLIASEG	O. lupi female	133.5	133.5	1	0
38	36	ELRDATDKLIASEGD	O. lupi female	0	0	0	0
38	37	LRDATDKLIASEGDR	O. lupi female	269.5	77.5	0.28757	269.5
38	38	RDATDKLIASEGDRN	O. lupi female	0	0	0	0
38	39	DATDKLIASEGDRNA	O. lupi female	92.5	92.5	1	0
38	40	ATDKLIASEGDRNAL	O. lupi female	0	0	0	0
38	41	TDKLIASEGDRNALR	O. lupi female	408.5	408.5	1	0
38	42	DKLIASEGDRNALRS	O. lupi female	0	0	0	0
38	43	KLIASEGDRNALRSE	O. lupi female	0	0	0	0
38	44	LIASEGDRNALRSEV	O. lupi female	52.5	52.5	1	0
38	45	IASEGDRNALRSEVE	O. lupi female	1121.5	442.5	0.394561	1121.5
38	46	ASEGDRNALRSEVER	O. lupi female	0	0	0	0
38	47	SEGDRNALRSEVERL	O. lupi female	565	25	0.0442478	565
38	48	EGDRNALRSEVERLQ	O. lupi female	126.5	126.5	1	0
38	49	GDRNALRSEVERLQH	O. lupi female	260	22	0.0846154	260
38	50	DRNALRSEVERLQHE	O. lupi female	212	54	0.254717	212
38	51	RNALRSEVERLQHEV	O. lupi female	0	0	0	0
38	52	NALRSEVERLQHEVQ	O. lupi female	0	0	0	0
38	53	ALRSEVERLQHEVQF	O. lupi female	758.5	59.5	0.0784443	758.5
38	54	LRSEVERLQHEVQFM	O. lupi female	254	252	0.992126	0
38	55	RSEVERLQHEVQFMR	O. lupi female	1049.5	48.5	0.0462125	1049.5
38	56	SEVERLQHEVQFMRE	O. lupi female	204.5	173.5	0.848411	0
38	57	EVERLQHEVQFMREQ	O. lupi female	530	44	0.0830189	530
38	58	VERLQHEVQFMREQL	O. lupi female	392.5	85.5	0.217834	392.5
38	59	ERLQHEVQFMREQLL	O. lupi female	1588.5	311.5	0.196097	1588.5
38	60	RLQHEVQFMREQLLR	O. lupi female	540.5	76.5	0.141536	540.5
38	61	LQHEVQFMREQLLRK	O. lupi female	0	0	0	0
38	62	QHEVQFMREQLLRKT	O. lupi female	0	0	0	0
38	63	HEVQFMREQLLRKTD	O. lupi female	0	0	0	0
38	64	EVQFMREQLLRKTDE	O. lupi female	0	0	0	0
38	65	VQFMREQLLRKTDEY	O. lupi female	684	38	0.0555556	684
38	66	QFMREQLLRKTDEYQ	O. lupi female	37	37	1	0
38	67	FMREQLLRKTDEYQA	O. lupi female	0	0	0	0
40	2	MREQLLRKTDEYQAA	O. lupi female	0	0	0	0
40	3	REQLLRKTDEYQAAL	O. lupi female	341.5	341.5	1	0
40	4	EQLLRKTDEYQAALS	O. lupi female	0	0	0	0
40	5	QLLRKTDEYQAALSD	O. lupi female	0	0	0	0
40	6	LLRKTDEYQAALSDL	O. lupi female	0	0	0	0
40	7	LRKTDEYQAALSDLV	O. lupi female	86	86	1	0
40	8	RKTDEYQAALSDLVN	O. lupi female	0	0	0	0
40	9	KTDEYQAALSDLVNA	O. lupi female	371	181	0.487871	0
40	10	TDEYQAALSDLVNAH	O. lupi female	418	278	0.665072	0
40	11	DEYQAALSDLVNAHR	O. lupi female	503	83	0.16501	503
40	12	EYQAALSDLVNAHRT	O. lupi female	144	144	1	0
40	13	YQAALSDLVNAHRTA	O. lupi female	0	0	0	0
40	14	QAALSDLVNAHRTAE	O. lupi female	0	0	0	0
40	15	AALSDLVNAHRTAED	O. lupi female	3.5	3.5	1	0
40	16	ALSDLVNAHRTAEDG	O. lupi female	0	0	0	0
40	17	LSDLVNAHRTAEDGR	O. lupi female	349	285	0.816619	0
40	18	SDLVNAHRTAEDGRV	O. lupi female	161.5	43.5	0.26935	161.5
40	19	DLVNAHRTAEDGRVN	O. lupi female	272	196	0.720588	0
40	20	LVNAHRTAEDGRVNA	O. lupi female	215	215	1	0
40	21	VNAHRTAEDGRVNAV	O. lupi female	0	0	0	0
40	22	NAHRTAEDGRVNAVQ	O. lupi female	156.5	156.5	1	0
40	23	AHRTAEDGRVNAVQE	O. lupi female	264	154	0.583333	0
40	24	HRTAEDGRVNAVQEL	O. lupi female	0	0	0	0
40	25	RTAEDGRVNAVQELE	O. lupi female	0	0	0	0
40	26	TAEDGRVNAVQELEA	O. lupi female	5	5	1	0
40	27	AEDGRVNAVQELEAR	O. lupi female	233	95	0.407725	0
40	28	EDGRVNAVQELEARK	O. lupi female	1399	429	0.306648	1399
40	29	DGRVNAVQELEARKY	O. lupi female	1716	852	0.496503	0
40	30	GRVNAVQELEARKYE	O. lupi female	2476.5	118.5	0.0478498	2476.5
40	31	RVNAVQELEARKYEI	O. lupi female	827	299	0.361548	827
40	32	VNAVQELEARKYEIN	O. lupi female	525	37	0.0704762	525
40	33	NAVQELEARKYEIND	O. lupi female	1056	50	0.0473485	1056
40	34	AVQELEARKYEINDL	O. lupi female	689	33	0.0478955	689
40	35	VQELEARKYEINDLQ	O. lupi female	558	314	0.562724	0
40	36	QELEARKYEINDLQS	O. lupi female	421.5	139.5	0.330961	421.5
40	37	ELEARKYEINDLQSR	O. lupi female	1556	163	0.104756	1556
40	38	LEARKYEINDLQSRL	O. lupi female	2059	237	0.115104	2059
40	39	EARKYEINDLQSRLD	O. lupi female	881.5	20.5	0.0232558	881.5
40	40	ARKYEINDLQSRLDN	O. lupi female	859	138	0.160652	859
40	41	RKYEINDLQSRLDNA	O. lupi female	0	0	0	0
40	42	KYEINDLQSRLDNAE	O. lupi female	75	75	1	0
40	43	YEINDLQSRLDNAEQ	O. lupi female	699	162	0.23176	699
40	44	EINDLQSRLDNAEQY	O. lupi female	2410	422	0.175104	2410
40	45	INDLQSRLDNAEQYL	O. lupi female	28	28	1	0
40	46	NDLQSRLDNAEQYLV	O. lupi female	0	0	0	0
40	47	DLQSRLDNAEQYLVT	O. lupi female	614.5	354.5	0.576892	0
40	48	LQSRLDNAEQYLVTL	O. lupi female	881.5	52.5	0.0595576	881.5
40	49	QSRLDNAEQYLVTLQ	O. lupi female	0	0	0	0
40	50	SRLDNAEQYLVTLQQ	O. lupi female	0	0	0	0
40	51	RLDNAEQYLVTLQQN	O. lupi female	0	0	0	0
40	52	LDNAEQYLVTLQQNY	O. lupi female	116	0	0	116
40	53	DNAEQYLVTLQQNYV	O. lupi female	0	0	0	0
40	54	NAEQYLVTLQQNYVA	O. lupi female	0	0	0	0
40	55	AEQYLVTLQQNYVAV	O. lupi female	0	0	0	0
40	56	EQYLVTLQQNYVAVE	O. lupi female	0	0	0	0
40	57	QYLVTLQQNYVAVEN	O. lupi female	0	0	0	0
40	58	YLVTLQQNYVAVENE	O. lupi female	0	0	0	0
40	59	LVTLQQNYVAVENER	O. lupi female	99.5	99.5	1	0
40	60	VTLQQNYVAVENERD	O. lupi female	0	0	0	0
40	61	TLQQNYVAVENERDM	O. lupi female	0	0	0	0
40	62	LQQNYVAVENERDML	O. lupi female	940	405	0.430851	0
40	63	QQNYVAVENERDMLY	O. lupi female	395	395	1	0
40	64	QNYVAVENERDMLYD	O. lupi female	0	0	0	0
40	65	NYVAVENERDMLYDA	O. lupi female	0	0	0	0
40	66	YVAVENERDMLYDAL	O. lupi female	16	16	1	0
40	67	VAVENERDMLYDALR	O. lupi female	221	221	1	0
42	2	AVENERDMLYDALRR	O. lupi female	979	35	0.0357508	979
42	3	VENERDMLYDALRRL	O. lupi female	914	44	0.04814	914
42	4	ENERDMLYDALRRLH	O. lupi female	1525.5	84.5	0.0553917	1525.5
42	5	NERDMLYDALRRLHS	O. lupi female	0	0	0	0
42	6	ERDMLYDALRRLHSM	O. lupi female	259	70	0.27027	259
42	7	RDMLYDALRRLHSMI	O. lupi female	325	85	0.261538	325
42	8	DMLYDALRRLHSMID	O. lupi female	2687	403	0.149981	2687
42	9	MLYDALRRLHSMIDR	O. lupi female	4578.5	7.5	0.00163809	4578.5
42	10	LYDALRRLHSMIDRT	O. lupi female	587	221	0.376491	587
42	11	YDALRRLHSMIDRTV	O. lupi female	490	120	0.244898	490
42	12	DALRRLHSMIDRTVT	O. lupi female	0	0	0	0
42	13	ALRRLHSMIDRTVTI	O. lupi female	0	0	0	0
42	14	LRRLHSMIDRTVTIN	O. lupi female	0	0	0	0
42	15	RRLHSMIDRTVTINR	O. lupi female	445	445	1	0
42	16	RLHSMIDRTVTINRF	O. lupi female	1731.5	208.5	0.120416	1731.5
42	17	LHSMIDRTVTINRFL	O. lupi female	2345	423	0.180384	2345
42	18	HSMIDRTVTINRFLI	O. lupi female	1309	487	0.37204	1309
42	19	SMIDRTVTINRFLIG	O. lupi female	1352.5	599.5	0.443253	0
42	20	MIDRTVTINRFLIGV	O. lupi female	851	685	0.804935	0
42	21	IDRTVTINRFLIGVD	O. lupi female	0	0	0	0
42	22	DRTVTINRFLIGVDE	O. lupi female	54	54	1	0
42	23	RTVTINRFLIGVDES	O. lupi female	0	0	0	0
42	24	TVTINRFLIGVDESM	O. lupi female	169	169	1	0
42	25	VTINRFLIGVDESME	O. lupi female	0	0	0	0
42	26	TINRFLIGVDESMEE	O. lupi female	209	209	1	0
42	27	INRFLIGVDESMEEK	O. lupi female	0	0	0	0
42	28	NRFLIGVDESMEEKK	O. lupi female	0	0	0	0
42	29	RFLIGVDESMEEKKE	O. lupi female	15	15	1	0
42	30	FLIGVDESMEEKKET	O. lupi female	0	0	0	0
42	31	LIGVDESMEEKKETV	O. lupi female	0	0	0	0
42	32	IGVDESMEEKKETVP	O. lupi female	0	0	0	0
42	33	GVDESMEEKKETVPQ	O. lupi female	0	0	0	0
42	34	VDESMEEKKETVPQT	O. lupi female	0	0	0	0
42	35	DESMEEKKETVPQTQ	O. lupi female	309	309	1	0
42	36	ESMEEKKETVPQTQK	O. lupi female	0	0	0	0
42	37	SMEEKKETVPQTQKS	O. lupi female	0	0	0	0
42	38	MEEKKETVPQTQKSP	O. lupi female	20	20	1	0
42	39	EEKKETVPQTQKSPD	O. lupi female	0	0	0	0
42	40	EKKETVPQTQKSPDG	O. lupi female	0	0	0	0
42	41	KKETVPQTQKSPDGK	O. lupi female	0	0	0	0
42	42	KETVPQTQKSPDGKT	O. lupi female	0	0	0	0
42	43	ETVPQTQKSPDGKTK	O. lupi female	0	0	0	0
42	44	TVPQTQKSPDGKTKE	O. lupi female	26	26	1	0
42	45	VPQTQKSPDGKTKER	O. lupi female	0	0	0	0
42	46	PQTQKSPDGKTKERF	O. lupi female	18	18	1	0
42	47	QTQKSPDGKTKERFD	O. lupi female	0	0	0	0
42	48	TQKSPDGKTKERFDI	O. lupi female	0	0	0	0
42	49	QKSPDGKTKERFDIS	O. lupi female	0	0	0	0
42	50	KSPDGKTKERFDISD	O. lupi female	0	0	0	0
42	51	SPDGKTKERFDISDL	O. lupi female	282	282	1	0
42	52	PDGKTKERFDISDLD	O. lupi female	0	0	0	0
42	53	DGKTKERFDISDLDT	O. lupi female	0	0	0	0
42	54	GKTKERFDISDLDTN	O. lupi female	0	0	0	0
42	55	KTKERFDISDLDTNI	O. lupi female	0	0	0	0
42	56	TKERFDISDLDTNIQ	O. lupi female	240	240	1	0
42	57	KERFDISDLDTNIQK	O. lupi female	160	160	1	0
42	58	ERFDISDLDTNIQKL	O. lupi female	0	0	0	0
42	59	RFDISDLDTNIQKLI	O. lupi female	27	27	1	0
42	60	FDISDLDTNIQKLIG	O. lupi female	0	0	0	0
42	61	DISDLDTNIQKLIGR	O. lupi female	588.5	360.5	0.612574	0
42	62	ISDLDTNIQKLIGRI	O. lupi female	0	0	0	0
42	63	SDLDTNIQKLIGRIE	O. lupi female	0	0	0	0
42	64	DLDTNIQKLIGRIEK	O. lupi female	0	0	0	0
42	65	LDTNIQKLIGRIEKL	O. lupi female	0	0	0	0
42	66	DTNIQKLIGRIEKLE	O. lupi female	542	542	1	0
42	67	TNIQKLIGRIEKLEL	O. lupi female	0	0	0	0
44	2	NIQKLIGRIEKLELE	O. lupi female	404	114	0.282178	404
44	3	IQKLIGRIEKLELER	O. lupi female	1673	167	0.0998207	1673
44	4	QKLIGRIEKLELERN	O. lupi female	161	161	1	0
44	5	KLIGRIEKLELERNE	O. lupi female	574	574	1	0
44	6	LIGRIEKLELERNEY	O. lupi female	3738	160	0.0428036	3738
44	7	IGRIEKLELERNEYR	O. lupi female	1536	22	0.0143229	1536
44	8	GRIEKLELERNEYRD	O. lupi female	348.5	17.5	0.0502152	348.5
44	9	RIEKLELERNEYRDA	O. lupi female	81	81	1	0
44	10	IEKLELERNEYRDAL	O. lupi female	0	0	0	0
44	11	EKLELERNEYRDALD	O. lupi female	93	93	1	0
44	12	KLELERNEYRDALDR	O. lupi female	1267.5	109.5	0.0863905	1267.5
44	13	LELERNEYRDALDRI	O. lupi female	1383	87	0.0629067	1383
44	14	ELERNEYRDALDRIK	O. lupi female	78	78	1	0
44	15	LERNEYRDALDRIKK	O. lupi female	275.5	134.5	0.488203	0
44	16	ERNEYRDALDRIKKK	O. lupi female	52	52	1	0
44	17	RNEYRDALDRIKKKS	O. lupi female	0	0	0	0
44	18	NEYRDALDRIKKKSI	O. lupi female	0	0	0	0
44	19	EYRDALDRIKKKSIE	O. lupi female	0	0	0	0
44	20	YRDALDRIKKKSIES	O. lupi female	0	0	0	0
44	21	RDALDRIKKKSIESH	O. lupi female	0	0	0	0
44	22	DALDRIKKKSIESHI	O. lupi female	288	288	1	0
44	23	ALDRIKKKSIESHIK	O. lupi female	0	0	0	0
44	24	LDRIKKKSIESHIKI	O. lupi female	0	0	0	0
44	25	DRIKKKSIESHIKIN	O. lupi female	64.5	64.5	1	0
44	26	RIKKKSIESHIKINK	O. lupi female	604.5	165.5	0.27378	604.5
44	27	IKKKSIESHIKINKQ	O. lupi female	0	0	0	0
44	28	KKKSIESHIKINKQE	O. lupi female	0	0	0	0
44	29	KKSIESHIKINKQET	O. lupi female	0	0	0	0
44	30	KSIESHIKINKQETI	O. lupi female	0	0	0	0
44	31	SIESHIKINKQETIF	O. lupi female	299	299	1	0
44	32	IESHIKINKQETIFT	O. lupi female	1012	226	0.22332	1012
44	33	ESHIKINKQETIFTN	O. lupi female	0	0	0	0
44	34	SHIKINKQETIFTNI	O. lupi female	361	361	1	0
44	35	HIKINKQETIFTNIE	O. lupi female	0	0	0	0
44	36	IKINKQETIFTNIED	O. lupi female	0	0	0	0
44	37	KINKQETIFTNIEDQ	O. lupi female	0	0	0	0
44	38	INKQETIFTNIEDQL	O. lupi female	203	203	1	0
44	39	NKQETIFTNIEDQLV	O. lupi female	158.5	158.5	1	0
44	40	KQETIFTNIEDQLVD	O. lupi female	0	0	0	0
44	41	QETIFTNIEDQLVDV	O. lupi female	175	175	1	0
44	42	ETIFTNIEDQLVDVE	O. lupi female	97	97	1	0
44	43	TIFTNIEDQLVDVEE	O. lupi female	91	47	0.516484	0
44	44	IFTNIEDQLVDVEEE	O. lupi female	0	0	0	0
44	45	FTNIEDQLVDVEEEK	O. lupi female	62.5	44.5	0.712	0
44	46	TNIEDQLVDVEEEKR	O. lupi female	13.5	13.5	1	0
44	47	NIEDQLVDVEEEKRT	O. lupi female	138	138	1	0
44	48	IEDQLVDVEEEKRTL	O. lupi female	0	0	0	0
44	49	EDQLVDVEEEKRTLE	O. lupi female	0	0	0	0
44	50	DQLVDVEEEKRTLEM	O. lupi female	1192	1018	0.854027	0
44	51	QLVDVEEEKRTLEMR	O. lupi female	404	259	0.641089	0
44	52	LVDVEEEKRTLEMRL	O. lupi female	1467.5	370.5	0.25247	1467.5
44	53	VDVEEEKRTLEMRLA	O. lupi female	149	21	0.14094	149
44	54	DVEEEKRTLEMRLAS	O. lupi female	0	0	0	0
44	55	VEEEKRTLEMRLASA	O. lupi female	7084	52	0.00734049	7084
44	56	EEEKRTLEMRLASAK	O. lupi female	0	0	0	0
44	57	EEKRTLEMRLASAKQ	O. lupi female	0	0	0	0
44	58	EKRTLEMRLASAKQL	O. lupi female	0	0	0	0
44	59	KRTLEMRLASAKQLL	O. lupi female	0	0	0	0
44	60	RTLEMRLASAKQLLR	O. lupi female	0	0	0	0
44	61	TLEMRLASAKQLLRS	O. lupi female	0	0	0	0
44	62	LEMRLASAKQLLRSQ	O. lupi female	0	0	0	0
44	63	EMRLASAKQLLRSQE	O. lupi female	0	0	0	0
44	64	MRLASAKQLLRSQEE	O. lupi female	0	0	0	0
44	65	RLASAKQLLRSQEEA	O. lupi female	0	0	0	0
44	66	LASAKQLLRSQEEAL	O. lupi female	0	0	0	0
44	67	ASAKQLLRSQEEALK	O. lupi female	0	0	0	0
46	2	SAKQLLRSQEEALKQ	O. lupi female	93	93	1	0
46	3	AKQLLRSQEEALKQR	O. lupi female	0	0	0	0
46	4	KQLLRSQEEALKQRD	O. lupi female	0	0	0	0
46	5	QLLRSQEEALKQRDE	O. lupi female	1267	1267	1	0
46	6	LLRSQEEALKQRDEE	O. lupi female	0	0	0	0
46	7	LRSQEEALKQRDEER	O. lupi female	121	121	1	0
46	8	RSQEEALKQRDEERR	O. lupi female	0	0	0	0
46	9	SQEEALKQRDEERRH	O. lupi female	508	508	1	0
46	10	QEEALKQRDEERRHM	O. lupi female	52	52	1	0
46	11	EEALKQRDEERRHMK	O. lupi female	3080.5	449.5	0.145918	0
46	12	EALKQRDEERRHMKL	O. lupi female	549	549	1	0
46	13	ALKQRDEERRHMKLK	O. lupi female	139	139	1	0
46	14	LKQRDEERRHMKLKI	O. lupi female	139	139	1	0
46	15	KQRDEERRHMKLKIA	O. lupi female	213	213	1	0
46	16	QRDEERRHMKLKIAK	O. lupi female	246	246	1	0
46	17	RDEERRHMKLKIAKF	O. lupi female	0	0	0	0
46	18	DEERRHMKLKIAKFE	O. lupi female	1421	315	0.221675	1421
46	19	EERRHMKLKIAKFEM	O. lupi female	2086.5	84.5	0.0404984	2086.5
46	20	ERRHMKLKIAKFEME	O. lupi female	1817.5	216.5	0.11912	1817.5
46	21	RRHMKLKIAKFEMEA	O. lupi female	1648	403	0.244539	1648
46	22	RHMKLKIAKFEMEAR	O. lupi female	533	109	0.204503	533
46	23	HMKLKIAKFEMEARG	O. lupi female	1116.5	130.5	0.116883	1116.5
46	24	MKLKIAKFEMEARGK	O. lupi female	62	62	1	0
46	25	KLKIAKFEMEARGKE	O. lupi female	0	0	0	0
46	26	LKIAKFEMEARGKEA	O. lupi female	159	159	1	0
46	27	KIAKFEMEARGKEAQ	O. lupi female	40	40	1	0
46	28	IAKFEMEARGKEAQL	O. lupi female	55	55	1	0
46	29	AKFEMEARGKEAQLR	O. lupi female	0	0	0	0
46	30	KFEMEARGKEAQLRQ	O. lupi female	165	165	1	0
46	31	FEMEARGKEAQLRQL	O. lupi female	117	117	1	0
46	32	EMEARGKEAQLRQLN	O. lupi female	640	62	0.096875	640
46	33	MEARGKEAQLRQLNE	O. lupi female	774	266	0.343669	774
46	34	EARGKEAQLRQLNEL	O. lupi female	332	62	0.186747	332
46	35	ARGKEAQLRQLNELV	O. lupi female	0	0	0	0
46	36	RGKEAQLRQLNELVR	O. lupi female	186	186	1	0
46	37	GKEAQLRQLNELVRN	O. lupi female	567	141	0.248677	567
46	38	KEAQLRQLNELVRNL	O. lupi female	578	248	0.429066	0
46	39	EAQLRQLNELVRNLR	O. lupi female	1521	30	0.0197239	1521
46	40	AQLRQLNELVRNLRK	O. lupi female	0	0	0	0
46	41	QLRQLNELVRNLRKD	O. lupi female	21	21	1	0
46	42	LRQLNELVRNLRKDL	O. lupi female	486	351	0.722222	0
46	43	RQLNELVRNLRKDLE	O. lupi female	0	0	0	0
46	44	QLNELVRNLRKDLET	O. lupi female	600	366	0.61	0
46	45	LNELVRNLRKDLETA	O. lupi female	763.5	507.5	0.664702	0
46	46	NELVRNLRKDLETAQ	O. lupi female	18	18	1	0
46	47	ELVRNLRKDLETAQG	O. lupi female	0	0	0	0
46	48	LVRNLRKDLETAQGD	O. lupi female	0	0	0	0
46	49	VRNLRKDLETAQGDL	O. lupi female	0	0	0	0
46	50	RNLRKDLETAQGDLG	O. lupi female	16	16	1	0
46	51	NLRKDLETAQGDLGV	O. lupi female	0	0	0	0
46	52	LRKDLETAQGDLGVL	O. lupi female	619	619	1	0
46	53	RKDLETAQGDLGVLH	O. lupi female	233.5	128.5	0.550321	0
46	54	KDLETAQGDLGVLHD	O. lupi female	177	177	1	0
46	55	DLETAQGDLGVLHDH	O. lupi female	293.5	66.5	0.226576	293.5
46	56	LETAQGDLGVLHDHE	O. lupi female	0	0	0	0
46	57	ETAQGDLGVLHDHEE	O. lupi female	0	0	0	0
46	58	TAQGDLGVLHDHEER	O. lupi female	180.5	133.5	0.739612	0
46	59	AQGDLGVLHDHEERW	O. lupi female	1703.5	58.5	0.0343411	1703.5
46	60	QGDLGVLHDHEERWY	O. lupi female	2963.5	308.5	0.1041	2963.5
46	61	GDLGVLHDHEERWYA	O. lupi female	1313	89	0.0677837	1313
46	62	DLGVLHDHEERWYAH	O. lupi female	1687.5	183.5	0.108741	1687.5
46	63	LGVLHDHEERWYAHK	O. lupi female	0	0	0	0
46	64	GVLHDHEERWYAHKF	O. lupi female	0	0	0	0
46	65	VLHDHEERWYAHKFH	O. lupi female	592	298	0.503378	0
46	66	LHDHEERWYAHKFHL	O. lupi female	893.5	247.5	0.277001	893.5
46	67	HDHEERWYAHKFHLE	O. lupi female	1551	126	0.0812379	1551
48	2	DHEERWYAHKFHLES	O. lupi female	1704.5	16.5	0.00968026	1704.5
48	3	HEERWYAHKFHLESK	O. lupi female	602	432	0.717608	0
48	4	EERWYAHKFHLESKL	O. lupi female	908.5	544.5	0.59934	0
48	5	ERWYAHKFHLESKLK	O. lupi female	492	492	1	0
48	6	RWYAHKFHLESKLKD	O. lupi female	0	0	0	0
48	7	WYAHKFHLESKLKDQ	O. lupi female	0	0	0	0
48	8	YAHKFHLESKLKDQE	O. lupi female	18	18	1	0
48	9	AHKFHLESKLKDQES	O. lupi female	0	0	0	0
48	10	HKFHLESKLKDQESE	O. lupi female	0	0	0	0
48	11	KFHLESKLKDQESES	O. lupi female	189	189	1	0
48	12	FHLESKLKDQESESQ	O. lupi female	101.5	1.5	0.0147783	101.5
48	13	HLESKLKDQESESQQ	O. lupi female	0	0	0	0
48	14	LESKLKDQESESQQI	O. lupi female	0	0	0	0
48	15	ESKLKDQESESQQIR	O. lupi female	0	0	0	0
48	16	SKLKDQESESQQIRL	O. lupi female	0	0	0	0
48	17	KLKDQESESQQIRLL	O. lupi female	62.5	62.5	1	0
48	18	LKDQESESQQIRLLL	O. lupi female	0	0	0	0
48	19	KDQESESQQIRLLLA	O. lupi female	80	80	1	0
48	20	DQESESQQIRLLLAN	O. lupi female	0	0	0	0
48	21	QESESQQIRLLLANF	O. lupi female	0	0	0	0
48	22	ESESQQIRLLLANFE	O. lupi female	2716.5	936.5	0.344745	2716.5
48	23	SESQQIRLLLANFES	O. lupi female	581.5	169.5	0.291488	581.5
48	24	ESQQIRLLLANFESE	O. lupi female	986	16	0.0162272	986
48	25	SQQIRLLLANFESER	O. lupi female	1790.5	415.5	0.232058	1790.5
48	26	QQIRLLLANFESERN	O. lupi female	1262.5	720.5	0.570693	1262.5
48	27	QIRLLLANFESERNS	O. lupi female	0	0	0	0
48	28	IRLLLANFESERNSL	O. lupi female	82.5	23.5	0.284848	82.5
48	29	RLLLANFESERNSLN	O. lupi female	0	0	0	0
48	30	LLLANFESERNSLNE	O. lupi female	27199	2225	0.0818045	27199
48	31	LLANFESERNSLNEK	O. lupi female	794.5	217.5	0.273757	794.5
48	32	LANFESERNSLNEKV	O. lupi female	105.5	105.5	1	105.5
48	33	ANFESERNSLNEKVR	O. lupi female	852	4	0.00469484	852
48	34	NFESERNSLNEKVRD	O. lupi female	1058	56	0.0529301	1058
48	35	FESERNSLNEKVRDL	O. lupi female	1192	230	0.192953	1192
48	36	ESERNSLNEKVRDLA	O. lupi female	322.5	277.5	0.860465	0
48	37	SERNSLNEKVRDLAS	O. lupi female	0	0	0	0
48	38	ERNSLNEKVRDLASR	O. lupi female	320.5	143.5	0.447738	0
48	39	RNSLNEKVRDLASRL	O. lupi female	357	161	0.45098	0
48	40	NSLNEKVRDLASRLQ	O. lupi female	233.5	233.5	1	0
48	41	SLNEKVRDLASRLQQ	O. lupi female	281	252	0.896797	0
48	42	LNEKVRDLASRLQQT	O. lupi female	1168.5	1168.5	1	0
48	43	NEKVRDLASRLQQTE	O. lupi female	39	39	1	0
48	44	EKVRDLASRLQQTES	O. lupi female	10	10	1	0
48	45	KVRDLASRLQQTESK	O. lupi female	0	0	0	0
48	46	VRDLASRLQQTESKN	O. lupi female	0	0	0	0
48	47	RDLASRLQQTESKNA	O. lupi female	0	0	0	0
48	48	DLASRLQQTESKNAD	O. lupi female	149	149	1	0
48	49	LASRLQQTESKNADI	O. lupi female	8286	615	0.0742216	8286
48	50	ASRLQQTESKNADIK	O. lupi female	328	328	1	0
48	51	SRLQQTESKNADIKE	O. lupi female	0	0	0	0
48	52	RLQQTESKNADIKED	O. lupi female	2239	2239	1	0
48	53	LQQTESKNADIKEDN	O. lupi female	0	0	0	0
48	54	QQTESKNADIKEDND	O. lupi female	0	0	0	0
48	55	QTESKNADIKEDNDR	O. lupi female	0	0	0	0
48	56	TESKNADIKEDNDRL	O. lupi female	0	0	0	0
48	57	ESKNADIKEDNDRLK	O. lupi female	0	0	0	0
48	58	SKNADIKEDNDRLKK	O. lupi female	0	0	0	0
48	59	KNADIKEDNDRLKKD	O. lupi female	0	0	0	0
48	60	NADIKEDNDRLKKDL	O. lupi female	0	0	0	0
48	61	ADIKEDNDRLKKDLI	O. lupi female	0	0	0	0
48	62	DIKEDNDRLKKDLIK	O. lupi female	0	0	0	0
48	63	IKEDNDRLKKDLIKA	O. lupi female	0	0	0	0
48	64	KEDNDRLKKDLIKAS	O. lupi female	0	0	0	0
48	65	EDNDRLKKDLIKAST	O. lupi female	604	604	1	0
48	66	DNDRLKKDLIKASTN	O. lupi female	0	0	0	0
48	67	NDRLKKDLIKASTNE	O. lupi female	126	126	1	0
50	2	DRLKKDLIKASTNEA	O. lupi female	0	0	0	0
50	3	RLKKDLIKASTNEAE	O. lupi female	0	0	0	0
50	4	LKKDLIKASTNEAEL	O. lupi female	0	0	0	0
50	5	KKDLIKASTNEAELR	O. lupi female	0	0	0	0
50	6	KDLIKASTNEAELRR	O. lupi female	354	94	0.265537	354
50	7	DLIKASTNEAELRRT	O. lupi female	64	64	1	0
50	8	LIKASTNEAELRRTI	O. lupi female	61	61	1	0
50	9	IKASTNEAELRRTID	O. lupi female	0	0	0	0
50	10	KASTNEAELRRTIDQ	O. lupi female	96	96	1	0
50	11	ASTNEAELRRTIDQS	O. lupi female	27.5	27.5	1	0
50	12	STNEAELRRTIDQSS	O. lupi female	2439	153	0.0627306	0
50	13	TNEAELRRTIDQSSR	O. lupi female	4113	221	0.0537321	4113
50	14	NEAELRRTIDQSSRV	O. lupi female	216	64	0.296296	216
50	15	EAELRRTIDQSSRVI	O. lupi female	544	129	0.237132	544
50	16	AELRRTIDQSSRVIS	O. lupi female	0	0	0	0
50	17	ELRRTIDQSSRVISD	O. lupi female	74	74	1	0
50	18	LRRTIDQSSRVISDN	O. lupi female	0	0	0	0
50	19	RRTIDQSSRVISDNQ	O. lupi female	0	0	0	0
50	20	RTIDQSSRVISDNQI	O. lupi female	166	166	1	0
50	21	TIDQSSRVISDNQIL	O. lupi female	112	112	1	0
50	22	IDQSSRVISDNQILK	O. lupi female	0	0	0	0
50	23	DQSSRVISDNQILKD	O. lupi female	0	0	0	0
50	24	QSSRVISDNQILKDQ	O. lupi female	0	0	0	0
50	25	SSRVISDNQILKDQL	O. lupi female	190	99	0.521053	0
50	26	SRVISDNQILKDQLE	O. lupi female	0	0	0	0
50	27	RVISDNQILKDQLES	O. lupi female	115	115	1	0
50	28	VISDNQILKDQLESA	O. lupi female	18.5	18.5	1	0
50	29	ISDNQILKDQLESAQ	O. lupi female	0	0	0	0
50	30	SDNQILKDQLESAQN	O. lupi female	27	27	1	0
50	31	DNQILKDQLESAQND	O. lupi female	0	0	0	0
50	32	NQILKDQLESAQNDL	O. lupi female	52	52	1	0
50	33	QILKDQLESAQNDLS	O. lupi female	0	0	0	0
50	34	ILKDQLESAQNDLSN	O. lupi female	0	0	0	0
50	35	LKDQLESAQNDLSNA	O. lupi female	0	0	0	0
50	36	KDQLESAQNDLSNAN	O. lupi female	94	94	1	0
50	37	DQLESAQNDLSNANN	O. lupi female	131	31	0.236641	131
50	38	QLESAQNDLSNANNR	O. lupi female	57.5	57.5	1	0
50	39	LESAQNDLSNANNRK	O. lupi female	0	0	0	0
50	40	ESAQNDLSNANNRKQ	O. lupi female	0	0	0	0
50	41	SAQNDLSNANNRKQQ	O. lupi female	0	0	0	0
50	42	AQNDLSNANNRKQQL	O. lupi female	51	51	1	0
50	43	QNDLSNANNRKQQLE	O. lupi female	0	0	0	0
50	44	NDLSNANNRKQQLEN	O. lupi female	83	83	1	0
50	45	DLSNANNRKQQLENE	O. lupi female	77	77	1	0
50	46	LSNANNRKQQLENEL	O. lupi female	434.5	122.5	0.281933	434.5
50	47	SNANNRKQQLENELL	O. lupi female	577	51	0.0883882	577
50	48	NANNRKQQLENELLV	O. lupi female	4.5	4.5	1	0
50	49	ANNRKQQLENELLVV	O. lupi female	0	0	0	0
50	50	NNRKQQLENELLVVR	O. lupi female	202.5	167.5	0.82716	0
50	51	NRKQQLENELLVVRS	O. lupi female	71.5	71.5	1	0
50	52	RKQQLENELLVVRSE	O. lupi female	0	0	0	0
50	53	KQQLENELLVVRSEL	O. lupi female	649	157	0.241911	649
50	54	QQLENELLVVRSELR	O. lupi female	1096	266	0.242701	1096
50	55	QLENELLVVRSELRD	O. lupi female	338.5	338.5	1	0
50	56	LENELLVVRSELRDL	O. lupi female	94.5	27.5	0.291005	94.5
50	57	ENELLVVRSELRDLK	O. lupi female	0	0	0	0
50	58	NELLVVRSELRDLKQ	O. lupi female	0	0	0	0
50	59	ELLVVRSELRDLKQR	O. lupi female	0	0	0	0
50	60	LLVVRSELRDLKQRF	O. lupi female	622	174	0.279743	622
50	61	LVVRSELRDLKQRFS	O. lupi female	43.5	43.5	1	0
50	62	VVRSELRDLKQRFSD	O. lupi female	340.5	227.5	0.668135	0
50	63	VRSELRDLKQRFSDN	O. lupi female	172	172	1	0
50	64	RSELRDLKQRFSDNA	O. lupi female	0	0	0	0
50	65	SELRDLKQRFSDNAN	O. lupi female	0	0	0	0
50	66	ELRDLKQRFSDNANR	O. lupi female	57	57	1	0
50	67	LRDLKQRFSDNANRI	O. lupi female	0	0	0	0
52	2	RDLKQRFSDNANRIM	O. lupi female	744.5	744.5	1	0
52	3	DLKQRFSDNANRIMD	O. lupi female	635	187	0.294488	635
52	4	LKQRFSDNANRIMDL	O. lupi female	41.5	41.5	1	0
52	5	KQRFSDNANRIMDLQ	O. lupi female	233	233	1	0
52	6	QRFSDNANRIMDLQR	O. lupi female	940	47	0.05	940
52	7	RFSDNANRIMDLQRH	O. lupi female	903.5	107.5	0.118982	903.5
52	8	FSDNANRIMDLQRHL	O. lupi female	696.5	93.5	0.134243	696.5
52	9	SDNANRIMDLQRHLT	O. lupi female	28	28	1	0
52	10	DNANRIMDLQRHLTD	O. lupi female	82	42	0.512195	0
52	11	NANRIMDLQRHLTDA	O. lupi female	0	0	0	0
52	12	ANRIMDLQRHLTDAE	O. lupi female	0	0	0	0
52	13	NRIMDLQRHLTDAEN	O. lupi female	307	307	1	0
52	14	RIMDLQRHLTDAEND	O. lupi female	0	0	0	0
52	15	IMDLQRHLTDAENDK	O. lupi female	0	0	0	0
52	16	MDLQRHLTDAENDKK	O. lupi female	223	223	1	0
52	17	DLQRHLTDAENDKKR	O. lupi female	100	100	1	0
52	18	LQRHLTDAENDKKRL	O. lupi female	310.5	310.5	1	0
52	19	QRHLTDAENDKKRLT	O. lupi female	0	0	0	0
52	20	RHLTDAENDKKRLTN	O. lupi female	103	103	1	0
52	21	HLTDAENDKKRLTNR	O. lupi female	747	231	0.309237	747
52	22	LTDAENDKKRLTNRL	O. lupi female	325	153	0.470769	0
52	23	TDAENDKKRLTNRLH	O. lupi female	151.5	151.5	1	0
52	24	DAENDKKRLTNRLHS	O. lupi female	0	0	0	0
52	25	AENDKKRLTNRLHSL	O. lupi female	41.5	41.5	1	0
52	26	ENDKKRLTNRLHSLE	O. lupi female	380	80	0.210526	380
52	27	NDKKRLTNRLHSLEK	O. lupi female	0	0	0	0
52	28	DKKRLTNRLHSLEKT	O. lupi female	0	0	0	0
52	29	KKRLTNRLHSLEKTV	O. lupi female	0	0	0	0
52	30	KRLTNRLHSLEKTVS	O. lupi female	0	0	0	0
52	31	RLTNRLHSLEKTVSQ	O. lupi female	0	0	0	0
52	32	LTNRLHSLEKTVSQQ	O. lupi female	0	0	0	0
52	33	TNRLHSLEKTVSQQR	O. lupi female	10	10	1	0
52	34	NRLHSLEKTVSQQRT	O. lupi female	97	97	1	0
52	35	RLHSLEKTVSQQRTI	O. lupi female	0	0	0	0
52	36	LHSLEKTVSQQRTIE	O. lupi female	291.5	223.5	0.766724	0
52	37	HSLEKTVSQQRTIET	O. lupi female	0	0	0	0
52	38	SLEKTVSQQRTIETE	O. lupi female	0	0	0	0
52	39	LEKTVSQQRTIETEI	O. lupi female	0	0	0	0
52	40	EKTVSQQRTIETEIR	O. lupi female	98	98	1	0
52	41	KTVSQQRTIETEIRQ	O. lupi female	57.5	57.5	1	0
52	42	TVSQQRTIETEIRQQ	O. lupi female	244	122	0.5	0
52	43	VSQQRTIETEIRQQL	O. lupi female	0	0	0	0
52	44	SQQRTIETEIRQQLS	O. lupi female	0	0	0	0
52	45	QQRTIETEIRQQLSL	O. lupi female	0	0	0	0
52	46	QRTIETEIRQQLSLA	O. lupi female	0	0	0	0
52	47	RTIETEIRQQLSLAL	O. lupi female	0	0	0	0
52	48	TIETEIRQQLSLALN	O. lupi female	0	0	0	0
52	49	IETEIRQQLSLALNE	O. lupi female	0	0	0	0
52	50	ETEIRQQLSLALNER	O. lupi female	378	72	0.190476	378
52	51	TEIRQQLSLALNERN	O. lupi female	64	64	1	0
52	52	EIRQQLSLALNERNT	O. lupi female	0	0	0	0
52	53	IRQQLSLALNERNTL	O. lupi female	0	0	0	0
52	54	RQQLSLALNERNTLQ	O. lupi female	0	0	0	0
52	55	QQLSLALNERNTLQN	O. lupi female	0	0	0	0
52	56	QLSLALNERNTLQND	O. lupi female	0	0	0	0
52	57	LSLALNERNTLQNDL	O. lupi female	263	89	0.338403	263
52	58	SLALNERNTLQNDLR	O. lupi female	68	68	1	0
52	59	LALNERNTLQNDLRD	O. lupi female	749	63	0.0841121	749
52	60	ALNERNTLQNDLRDL	O. lupi female	56.5	25.5	0.451327	0
52	61	LNERNTLQNDLRDLQ	O. lupi female	569	569	1	0
52	62	NERNTLQNDLRDLQR	O. lupi female	365.5	33.5	0.0916553	365.5
52	63	ERNTLQNDLRDLQRR	O. lupi female	491.5	257.5	0.523906	0
52	64	RNTLQNDLRDLQRRL	O. lupi female	279.5	29.5	0.105546	279.5
52	65	NTLQNDLRDLQRRLA	O. lupi female	0	0	0	0
52	66	TLQNDLRDLQRRLAR	O. lupi female	163	155	0.95092	0
52	67	LQNDLRDLQRRLARM	O. lupi female	317	41	0.129338	317
54	2	QNDLRDLQRRLARME	O. lupi female	1239	3	0.00242131	1239
54	3	NDLRDLQRRLARMET	O. lupi female	2188.5	18.5	0.00845328	2188.5
54	4	DLRDLQRRLARMETE	O. lupi female	97	97	1	0
54	5	LRDLQRRLARMETEK	O. lupi female	0	0	0	0
54	6	RDLQRRLARMETEKK	O. lupi female	360	34	0.0944444	360
54	7	DLQRRLARMETEKKI	O. lupi female	340	340	1	0
54	8	LQRRLARMETEKKIM	O. lupi female	25	25	1	0
54	9	QRRLARMETEKKIMN	O. lupi female	1203.5	730.5	0.60698	0
54	10	RRLARMETEKKIMND	O. lupi female	1234.5	239.5	0.194006	1234.5
54	11	RLARMETEKKIMNDK	O. lupi female	0	0	0	0
54	12	LARMETEKKIMNDKY	O. lupi female	2363	543	0.229793	2363
54	13	ARMETEKKIMNDKYD	O. lupi female	1742.5	180.5	0.103587	1742.5
54	14	RMETEKKIMNDKYDE	O. lupi female	2623.5	6.5	0.00247761	0
54	15	METEKKIMNDKYDEL	O. lupi female	423	137	0.323877	423
54	16	ETEKKIMNDKYDELE	O. lupi female	299	299	1	0
54	17	TEKKIMNDKYDELEK	O. lupi female	0	0	0	0
54	18	EKKIMNDKYDELEKI	O. lupi female	0	0	0	0
54	19	KKIMNDKYDELEKIR	O. lupi female	1676.5	633.5	0.377871	0
54	20	KIMNDKYDELEKIRA	O. lupi female	627	627	1	0
54	21	IMNDKYDELEKIRAS	O. lupi female	1992.5	1149.5	0.576913	0
54	22	MNDKYDELEKIRASL	O. lupi female	85	85	1	0
54	23	NDKYDELEKIRASLI	O. lupi female	173	173	1	0
54	24	DKYDELEKIRASLIK	O. lupi female	180.5	180.5	1	0
54	25	KYDELEKIRASLIKR	O. lupi female	209.5	144.5	0.689737	0
54	26	YDELEKIRASLIKRI	O. lupi female	368.5	275.5	0.747626	0
54	27	DELEKIRASLIKRIE	O. lupi female	753.5	44.5	0.0590577	753.5
54	28	ELEKIRASLIKRIEL	O. lupi female	1064	110	0.103383	1064
54	29	LEKIRASLIKRIELL	O. lupi female	1207	179	0.148302	1207
54	30	EKIRASLIKRIELLD	O. lupi female	809.5	97.5	0.120445	809.5
54	31	KIRASLIKRIELLDE	O. lupi female	118	90	0.762712	0
54	32	IRASLIKRIELLDEE	O. lupi female	119	119	1	0
54	33	RASLIKRIELLDEEK	O. lupi female	0	0	0	0
54	34	ASLIKRIELLDEEKR	O. lupi female	0	0	0	0
54	35	SLIKRIELLDEEKRT	O. lupi female	0	0	0	0
54	36	LIKRIELLDEEKRTM	O. lupi female	324.5	5.5	0.0169492	324.5
54	37	IKRIELLDEEKRTME	O. lupi female	204	204	1	0
54	38	KRIELLDEEKRTMEN	O. lupi female	107	107	1	0
54	39	RIELLDEEKRTMENI	O. lupi female	1593.5	293.5	0.184186	1593.5
54	40	IELLDEEKRTMENIL	O. lupi female	1204	764	0.634551	0
54	41	ELLDEEKRTMENILH	O. lupi female	1386.5	248.5	0.179228	1386.5
54	42	LLDEEKRTMENILHE	O. lupi female	461.5	333.5	0.722644	0
54	43	LDEEKRTMENILHET	O. lupi female	607	607	1	0
54	44	DEEKRTMENILHETA	O. lupi female	0	0	0	0
54	45	EEKRTMENILHETAL	O. lupi female	80.5	80.5	1	0
54	46	EKRTMENILHETALQ	O. lupi female	0	0	0	0
54	47	KRTMENILHETALQR	O. lupi female	369	193	0.523035	0
54	48	RTMENILHETALQRE	O. lupi female	1401	143	0.10207	1401
54	49	TMENILHETALQREA	O. lupi female	688	688	1	0
54	50	MENILHETALQREAI	O. lupi female	0	0	0	0
54	51	ENILHETALQREAIE	O. lupi female	0	0	0	0
54	52	NILHETALQREAIES	O. lupi female	3	3	1	0
54	53	ILHETALQREAIESS	O. lupi female	0	0	0	0
54	54	LHETALQREAIESSL	O. lupi female	300	52	0.173333	300
54	55	HETALQREAIESSLN	O. lupi female	0	0	0	0
54	56	ETALQREAIESSLNA	O. lupi female	0	0	0	0
54	57	TALQREAIESSLNAL	O. lupi female	578.5	6.5	0.011236	578.5
54	58	ALQREAIESSLNALE	O. lupi female	3556	718	0.201912	3556
54	59	LQREAIESSLNALER	O. lupi female	2889	1	0.000346141	2889
54	60	QREAIESSLNALERE	O. lupi female	2482	6	0.00241741	2482
54	61	REAIESSLNALEREN	O. lupi female	437.5	318.5	0.728	0
54	62	EAIESSLNALERENK	O. lupi female	161	25	0.15528	161
54	63	AIESSLNALERENKE	O. lupi female	0	0	0	0
54	64	IESSLNALERENKEL	O. lupi female	680	214	0.314706	680
54	65	ESSLNALERENKELH	O. lupi female	1400	90	0.0642857	1400
54	66	SSLNALERENKELHR	O. lupi female	416.5	199.5	0.478992	0
54	67	SLNALERENKELHRN	O. lupi female	21	21	1	0
56	2	LNALERENKELHRNC	O. lupi female	93	93	1	0
56	3	NALERENKELHRNCA	O. lupi female	181	181	1	0
56	4	ALERENKELHRNCAQ	O. lupi female	0	0	0	0
56	5	LERENKELHRNCAQL	O. lupi female	150.5	150.5	1	0
56	6	ERENKELHRNCAQLQ	O. lupi female	0	0	0	0
56	7	RENKELHRNCAQLQQ	O. lupi female	0	0	0	0
56	8	ENKELHRNCAQLQQQ	O. lupi female	0	0	0	0
56	9	NKELHRNCAQLQQQI	O. lupi female	0	0	0	0
56	10	KELHRNCAQLQQQIA	O. lupi female	0	0	0	0
56	11	ELHRNCAQLQQQIAQ	O. lupi female	103.5	103.5	1	0
56	12	LHRNCAQLQQQIAQL	O. lupi female	581	581	1	0
56	13	HRNCAQLQQQIAQLE	O. lupi female	0	0	0	0
56	14	RNCAQLQQQIAQLEL	O. lupi female	181.5	10.5	0.0578512	181.5
56	15	NCAQLQQQIAQLELE	O. lupi female	1133.5	465.5	0.410675	1133.5
56	16	CAQLQQQIAQLELEN	O. lupi female	971.5	369.5	0.38034	971.5
56	17	AQLQQQIAQLELENG	O. lupi female	0	0	0	0
56	18	QLQQQIAQLELENGN	O. lupi female	25	25	1	0
56	19	LQQQIAQLELENGNR	O. lupi female	395.5	238.5	0.603034	395.5
56	20	QQQIAQLELENGNRL	O. lupi female	955.5	715.5	0.748823	955.5
56	21	QQIAQLELENGNRLI	O. lupi female	1236.5	220.5	0.178326	1236.5
56	22	QIAQLELENGNRLIQ	O. lupi female	382	382	1	382
56	23	IAQLELENGNRLIQL	O. lupi female	909	663	0.729373	909
56	24	AQLELENGNRLIQLT	O. lupi female	30.5	30.5	1	0
56	25	QLELENGNRLIQLTN	O. lupi female	229	179	0.781659	0
56	26	LELENGNRLIQLTNK	O. lupi female	207.5	207.5	1	0
56	27	ELENGNRLIQLTNKQ	O. lupi female	272.5	272.5	1	0
56	28	LENGNRLIQLTNKQR	O. lupi female	0	0	0	0
56	29	ENGNRLIQLTNKQRE	O. lupi female	188	178	0.946809	0
56	30	NGNRLIQLTNKQREE	O. lupi female	526	58	0.110266	526
56	31	GNRLIQLTNKQREEY	O. lupi female	2212.5	127.5	0.0576271	2212.5
56	32	NRLIQLTNKQREEYD	O. lupi female	1570	42	0.0267516	1570
56	33	RLIQLTNKQREEYDK	O. lupi female	514.5	236.5	0.45967	0
56	34	LIQLTNKQREEYDKF	O. lupi female	1232.5	360.5	0.292495	1232.5
56	35	IQLTNKQREEYDKFT	O. lupi female	428	428	1	0
56	36	QLTNKQREEYDKFTQ	O. lupi female	13	13	1	0
56	37	LTNKQREEYDKFTQN	O. lupi female	0	0	0	0
56	38	TNKQREEYDKFTQNM	O. lupi female	1530	204	0.133333	1530
56	39	NKQREEYDKFTQNMR	O. lupi female	3026	468	0.15466	3026
56	40	KQREEYDKFTQNMRT	O. lupi female	4840.5	360.5	0.0744758	4840.5
56	41	QREEYDKFTQNMRTE	O. lupi female	1215	96	0.0790123	1215
56	42	REEYDKFTQNMRTEK	O. lupi female	524	258	0.492366	0
56	43	EEYDKFTQNMRTEKL	O. lupi female	0	0	0	0
56	44	EYDKFTQNMRTEKLQ	O. lupi female	393	263	0.669211	0
56	45	YDKFTQNMRTEKLQI	O. lupi female	0	0	0	0
56	46	DKFTQNMRTEKLQIE	O. lupi female	0	0	0	0
56	47	KFTQNMRTEKLQIER	O. lupi female	965	631	0.653886	0
56	48	FTQNMRTEKLQIERI	O. lupi female	302.5	204.5	0.676033	0
56	49	TQNMRTEKLQIERII	O. lupi female	1555	101	0.0649518	1555
56	50	QNMRTEKLQIERIIE	O. lupi female	1019.5	128.5	0.126042	1019.5
56	51	NMRTEKLQIERIIES	O. lupi female	1273	847	0.665357	0
56	52	MRTEKLQIERIIESR	O. lupi female	391	293	0.749361	0
56	53	RTEKLQIERIIESRE	O. lupi female	120.5	40.5	0.3361	120.5
56	54	TEKLQIERIIESRER	O. lupi female	56.5	56.5	1	0
56	55	EKLQIERIIESRERS	O. lupi female	235.5	11.5	0.0488323	235.5
56	56	KLQIERIIESRERSL	O. lupi female	0	0	0	0
56	57	LQIERIIESRERSLK	O. lupi female	0	0	0	0
56	58	QIERIIESRERSLKS	O. lupi female	0	0	0	0
56	59	IERIIESRERSLKSR	O. lupi female	0	0	0	0
56	60	ERIIESRERSLKSRI	O. lupi female	100.5	100.5	1	0
56	61	RIIESRERSLKSRIN	O. lupi female	0	0	0	0
56	62	IIESRERSLKSRINQ	O. lupi female	0	0	0	0
56	63	IESRERSLKSRINQL	O. lupi female	0	0	0	0
56	64	ESRERSLKSRINQLE	O. lupi female	711	99	0.139241	711
56	65	SRERSLKSRINQLEN	O. lupi female	0	0	0	0
56	66	RERSLKSRINQLENQ	O. lupi female	0	0	0	0
56	67	ERSLKSRINQLENQL	O. lupi female	128	128	1	0
58	2	RSLKSRINQLENQLN	O. lupi female	230	230	1	0
58	3	SLKSRINQLENQLNI	O. lupi female	188	54	0.287234	188
58	4	LKSRINQLENQLNIM	O. lupi female	1464.5	139.5	0.0952544	1464.5
58	5	KSRINQLENQLNIMR	O. lupi female	3487.5	8.5	0.00243728	3487.5
58	6	SRINQLENQLNIMRD	O. lupi female	2851	1055	0.370046	2851
58	7	RINQLENQLNIMRDQ	O. lupi female	1960.5	635.5	0.324152	1960.5
58	8	INQLENQLNIMRDQL	O. lupi female	1827	239	0.130816	1827
58	9	NQLENQLNIMRDQLN	O. lupi female	1030.5	381.5	0.370209	1030.5
58	10	QLENQLNIMRDQLNS	O. lupi female	329	49	0.148936	329
58	11	LENQLNIMRDQLNSE	O. lupi female	56.5	56.5	1	0
58	12	ENQLNIMRDQLNSER	O. lupi female	1222.5	131.5	0.107566	1222.5
58	13	NQLNIMRDQLNSERR	O. lupi female	521	123	0.236084	521
58	14	QLNIMRDQLNSERRR	O. lupi female	1848.5	39.5	0.0213687	1848.5
58	15	LNIMRDQLNSERRRR	O. lupi female	2751	311	0.11305	2751
58	16	NIMRDQLNSERRRRR	O. lupi female	1189	15	0.0126156	1189
58	17	IMRDQLNSERRRRRE	O. lupi female	2950	1022	0.346441	2950
58	18	MRDQLNSERRRRREI	O. lupi female	3101	277	0.089326	3101
58	19	RDQLNSERRRRREIS	O. lupi female	0	0	0	0
58	20	DQLNSERRRRREISD	O. lupi female	549.5	163.5	0.297543	549.5
58	21	QLNSERRRRREISDK	O. lupi female	0	0	0	0
58	22	LNSERRRRREISDKI	O. lupi female	0	0	0	0
58	23	NSERRRRREISDKIL	O. lupi female	15	15	1	0
58	24	SERRRRREISDKILS	O. lupi female	0	0	0	0
58	25	ERRRRREISDKILSG	O. lupi female	0	0	0	0
58	26	RRRRREISDKILSGE	O. lupi female	0	0	0	0
58	27	RRRREISDKILSGEV	O. lupi female	70	70	1	0
58	28	RRREISDKILSGEVN	O. lupi female	0	0	0	0
58	29	RREISDKILSGEVNK	O. lupi female	0	0	0	0
58	30	REISDKILSGEVNKL	O. lupi female	0	0	0	0
58	31	EISDKILSGEVNKLN	O. lupi female	0	0	0	0
58	32	ISDKILSGEVNKLNV	O. lupi female	0	0	0	0
58	33	SDKILSGEVNKLNVT	O. lupi female	0	0	0	0
58	34	DKILSGEVNKLNVTL	O. lupi female	262	45	0.171756	262
58	35	KILSGEVNKLNVTLS	O. lupi female	58.5	9.5	0.162393	58.5
58	36	ILSGEVNKLNVTLSG	O. lupi female	0	0	0	0
58	37	LSGEVNKLNVTLSGI	O. lupi female	0	0	0	0
58	38	SGEVNKLNVTLSGIP	O. lupi female	0	0	0	0
58	39	GEVNKLNVTLSGIPD	O. lupi female	59	59	1	0
58	40	EVNKLNVTLSGIPDA	O. lupi female	279.5	279.5	1	0
58	41	VNKLNVTLSGIPDAY	O. lupi female	292.5	53.5	0.182906	292.5
58	42	NKLNVTLSGIPDAYE	O. lupi female	169	169	1	0
58	43	KLNVTLSGIPDAYEI	O. lupi female	0	0	0	0
58	44	LNVTLSGIPDAYEIY	O. lupi female	2279	541	0.237385	2279
58	45	NVTLSGIPDAYEIYD	O. lupi female	0	0	0	0
58	46	VTLSGIPDAYEIYDR	O. lupi female	554	140	0.252708	554
58	47	TLSGIPDAYEIYDRT	O. lupi female	248	248	1	0
58	48	LSGIPDAYEIYDRTL	O. lupi female	193.5	193.5	1	0
58	49	SGIPDAYEIYDRTLY	O. lupi female	570	30	0.0526316	570
58	50	GIPDAYEIYDRTLYS	O. lupi female	0	0	0	0
58	51	IPDAYEIYDRTLYSY	O. lupi female	381	281	0.737533	0
58	52	PDAYEIYDRTLYSYN	O. lupi female	505	505	1	0
58	53	DAYEIYDRTLYSYNT	O. lupi female	0	0	0	0
58	54	AYEIYDRTLYSYNTY	O. lupi female	1912.5	155.5	0.0813072	1912.5
58	55	YEIYDRTLYSYNTYF	O. lupi female	2134.5	19.5	0.00913563	2134.5
58	56	EIYDRTLYSYNTYFG	O. lupi female	680.5	258.5	0.379868	680.5
58	57	IYDRTLYSYNTYFGT	O. lupi female	0	0	0	0
58	58	YDRTLYSYNTYFGTP	O. lupi female	326	326	1	0
58	59	DRTLYSYNTYFGTPS	O. lupi female	21	21	1	0
58	60	RTLYSYNTYFGTPSF	O. lupi female	1428.5	43.5	0.0304515	1428.5
58	61	TLYSYNTYFGTPSFT	O. lupi female	134	132	0.985075	0
58	62	LYSYNTYFGTPSFTV	O. lupi female	135	11	0.0814815	135
58	63	YSYNTYFGTPSFTVG	O. lupi female	35	35	1	0
58	64	SYNTYFGTPSFTVGS	O. lupi female	0	0	0	0
58	65	YNTYFGTPSFTVGSS	O. lupi female	0	0	0	0
58	66	NTYFGTPSFTVGSSS	O. lupi female	0	0	0	0
58	67	TYFGTPSFTVGSSSF	O. lupi female	484.5	48.5	0.100103	484.5
60	2	YFGTPSFTVGSSSFD	O. lupi female	214.5	103.5	0.482517	0
60	3	FGTPSFTVGSSSFDP	O. lupi female	113	113	1	0
60	4	GTPSFTVGSSSFDPN	O. lupi female	0	0	0	0
60	5	TPSFTVGSSSFDPNI	O. lupi female	0	0	0	0
60	6	PSFTVGSSSFDPNIT	O. lupi female	0	0	0	0
60	7	SFTVGSSSFDPNITD	O. lupi female	25.5	25.5	1	0
60	8	FTVGSSSFDPNITDD	O. lupi female	0	0	0	0
60	9	TVGSSSFDPNITDDS	O. lupi female	0	0	0	0
60	10	VGSSSFDPNITDDSK	O. lupi female	0	0	0	0
60	11	GSSSFDPNITDDSKI	O. lupi female	0	0	0	0
60	12	SSSFDPNITDDSKII	O. lupi female	71	71	1	0
60	13	SSFDPNITDDSKIIL	O. lupi female	0	0	0	0
60	14	SFDPNITDDSKIILK	O. lupi female	335	159	0.474627	0
60	15	FDPNITDDSKIILKH	O. lupi female	125	125	1	0
60	16	DPNITDDSKIILKHS	O. lupi female	0	0	0	0
60	17	PNITDDSKIILKHSD	O. lupi female	0	0	0	0
60	18	NITDDSKIILKHSDR	O. lupi female	0	0	0	0
60	19	ITDDSKIILKHSDRL	O. lupi female	0	0	0	0
60	20	TDDSKIILKHSDRLE	O. lupi female	131.5	131.5	1	0
60	21	DDSKIILKHSDRLES	O. lupi female	0	0	0	0
60	22	DSKIILKHSDRLESS	O. lupi female	0	0	0	0
60	23	SKIILKHSDRLESSY	O. lupi female	2017.5	793.5	0.393309	2017.5
60	24	KIILKHSDRLESSYA	O. lupi female	650	11	0.0169231	650
60	25	IILKHSDRLESSYAY	O. lupi female	2035.5	47.5	0.0233358	2035.5
60	26	ILKHSDRLESSYAYG	O. lupi female	305	129	0.422951	0
60	27	LKHSDRLESSYAYGG	O. lupi female	0	0	0	0
60	28	KHSDRLESSYAYGGG	O. lupi female	0	0	0	0
60	29	HSDRLESSYAYGGGN	O. lupi female	631.5	273.5	0.433096	0
60	30	SDRLESSYAYGGGNH	O. lupi female	783	164	0.209451	783
60	31	DRLESSYAYGGGNHT	O. lupi female	439	35	0.0797267	439
60	32	RLESSYAYGGGNHTS	O. lupi female	0	0	0	0
60	33	LESSYAYGGGNHTSD	O. lupi female	156	156	1	0
60	34	ESSYAYGGGNHTSDT	O. lupi female	167	167	1	0
60	35	SSYAYGGGNHTSDTA	O. lupi female	51	51	1	0
60	36	SYAYGGGNHTSDTAI	O. lupi female	296	122	0.412162	0
60	37	YAYGGGNHTSDTAIT	O. lupi female	76.5	76.5	1	0
60	38	AYGGGNHTSDTAITA	O. lupi female	0	0	0	0
60	39	YGGGNHTSDTAITAP	O. lupi female	0	0	0	0
60	40	GGGNHTSDTAITAPT	O. lupi female	22.5	22.5	1	0
60	41	GGNHTSDTAITAPTG	O. lupi female	0	0	0	0
60	42	GNHTSDTAITAPTGS	O. lupi female	4.5	4.5	1	0
60	43	NHTSDTAITAPTGSS	O. lupi female	0	0	0	0
60	44	HTSDTAITAPTGSSS	O. lupi female	0	0	0	0
60	45	TSDTAITAPTGSSSY	O. lupi female	0	0	0	0
60	46	SDTAITAPTGSSSYH	O. lupi female	263.5	263.5	1	0
60	47	DTAITAPTGSSSYHS	O. lupi female	42	42	1	0
60	48	TAITAPTGSSSYHSQ	O. lupi female	0	0	0	0
60	49	AITAPTGSSSYHSQR	O. lupi female	77	77	1	0
60	50	ITAPTGSSSYHSQRS	O. lupi female	0	0	0	0
60	51	TAPTGSSSYHSQRSD	O. lupi female	1769	1009	0.570379	0
60	52	APTGSSSYHSQRSDD	O. lupi female	0	0	0	0
60	53	PTGSSSYHSQRSDDH	O. lupi female	29	29	1	0
60	54	TGSSSYHSQRSDDHT	O. lupi female	0	0	0	0
60	55	GSSSYHSQRSDDHTV	O. lupi female	0	0	0	0
60	56	SSSYHSQRSDDHTVN	O. lupi female	0	0	0	0
60	57	SSYHSQRSDDHTVNE	O. lupi female	7529	1099	0.145969	7529
60	58	SYHSQRSDDHTVNES	O. lupi female	537	537	1	0
60	59	YHSQRSDDHTVNESE	O. lupi female	0	0	0	0
60	60	HSQRSDDHTVNESEG	O. lupi female	0	0	0	0
60	61	SQRSDDHTVNESEGG	O. lupi female	0	0	0	0
60	62	QRSDDHTVNESEGGG	O. lupi female	0	0	0	0
60	63	RSDDHTVNESEGGGN	O. lupi female	467	61	0.130621	467
60	64	SDDHTVNESEGGGND	O. lupi female	0	0	0	0
60	65	DDHTVNESEGGGNDP	O. lupi female	466	98	0.2103	466
60	66	DHTVNESEGGGNDPG	O. lupi female	779.5	40.5	0.0519564	779.5
60	67	HTVNESEGGGNDPGK	O. lupi female	122	122	1	0
62	2	TVNESEGGGNDPGKG	O. lupi female	393.5	393.5	1	0
62	3	VNESEGGGNDPGKGT	O. lupi female	2133	135	0.0632911	0
62	4	NESEGGGNDPGKGTK	O. lupi female	0	0	0	0
62	5	ESEGGGNDPGKGTKQ	O. lupi female	0	0	0	0
62	6	SEGGGNDPGKGTKQV	O. lupi female	96	96	1	0
62	7	EGGGNDPGKGTKQVD	O. lupi female	0	0	0	0
62	8	GGGNDPGKGTKQVDG	O. lupi female	0	0	0	0
62	9	GGNDPGKGTKQVDGE	O. lupi female	0	0	0	0
62	10	GNDPGKGTKQVDGEG	O. lupi female	0	0	0	0
62	11	NDPGKGTKQVDGEGG	O. lupi female	0	0	0	0
62	12	DPGKGTKQVDGEGGS	O. lupi female	0	0	0	0
62	13	PGKGTKQVDGEGGSL	O. lupi female	62	62	1	0
62	14	GKGTKQVDGEGGSLS	O. lupi female	0	0	0	0
62	15	KGTKQVDGEGGSLSL	O. lupi female	0	0	0	0
62	16	GTKQVDGEGGSLSLS	O. lupi female	0	0	0	0
62	17	TKQVDGEGGSLSLSE	O. lupi female	265	109	0.411321	0
62	18	KQVDGEGGSLSLSEI	O. lupi female	198	198	1	0
62	19	QVDGEGGSLSLSEIG	O. lupi female	629.5	600.5	0.953932	0
[truncated: 845 more rows]
