# Supplementary material for: Major antigen and paramyosin proteins as candidate biomarkers for serodiagnosis of canine infection by zoonotic Onchocerca lupi
Source: PLoS Negl Trop Dis. 2021 Feb 10;15(2):e0009027. doi: 10.1371/journal.pntd.0009027 (PMC7875354; doi:10.1371/journal.pntd.0009027)
Supplement: S8 Table — Ol-MJA and Ol-PARA sequences were screened scanning the entire sequence using a 15mer peptide. The parameters included in the table are: the row and column number of the microarray plate, peptide sequence, signal intensity against C. bainae dog serum diluted 1:1000, standard deviation, deviation [%], corrected signal intensity against C. bainae dog serum diluted 1:1000. The table was generated from the formatted raw data and lists averaged spot intensities and spot-to-spot deviations. Spots with a deviation of >40% were zeroed in the column with the corrected intensity values. (XLSX) [file pntd.0009027.s009.xlsx]

## Sheet: Foglio1
Supplementary Table 8. Mapping Onchocerca lupi Major antigen and Paramyosin - Dog Serum C. Bainae
The mapping summary was generated from the formatted raw data and lists averaged spot intensities and spot-to-spot deviations. Spots with a deviation of >40% were zeroed in the column with the corrected intensity values.
Row	Column	Peptide	Antigen	Dog serum C. bainae, 1:1000	Deviation	Deviation [%]	Dog serum C. bainae, 1:1000 (corr.)
2	2	GSGSGSGMEQAREGA	O. lupi female	126.5	126.5	1	0
2	3	SGSGSGMEQAREGAP	O. lupi female	0	0	0	0
2	4	GSGSGMEQAREGAPS	O. lupi female	0	0	0	0
2	5	SGSGMEQAREGAPSK	O. lupi female	0	0	0	0
2	6	GSGMEQAREGAPSKE	O. lupi female	0	0	0	0
2	7	SGMEQAREGAPSKER	O. lupi female	142.75	142.75	1	0
2	8	GMEQAREGAPSKERR	O. lupi female	210	210	1	0
2	9	MEQAREGAPSKERRS	O. lupi female	129	129	1	0
2	10	EQAREGAPSKERRSA	O. lupi female	0	0	0	0
2	11	QAREGAPSKERRSAE	O. lupi female	0	0	0	0
2	12	AREGAPSKERRSAEK	O. lupi female	0	0	0	0
2	13	REGAPSKERRSAEKT	O. lupi female	0	0	0	0
2	14	EGAPSKERRSAEKTI	O. lupi female	15	15	1	0
2	15	GAPSKERRSAEKTIS	O. lupi female	0	0	0	0
2	16	APSKERRSAEKTISR	O. lupi female	76.5	76.5	1	0
2	17	PSKERRSAEKTISRE	O. lupi female	60.5	60.5	1	0
2	18	SKERRSAEKTISRET	O. lupi female	0	0	0	0
2	19	KERRSAEKTISRETK	O. lupi female	412.5	412.5	1	0
2	20	ERRSAEKTISRETKY	O. lupi female	0	0	0	0
2	21	RRSAEKTISRETKYE	O. lupi female	0	0	0	0
2	22	RSAEKTISRETKYEI	O. lupi female	0	0	0	0
2	23	SAEKTISRETKYEIA	O. lupi female	0	0	0	0
2	24	AEKTISRETKYEIAA	O. lupi female	0	0	0	0
2	25	EKTISRETKYEIAAS	O. lupi female	0	0	0	0
2	26	KTISRETKYEIAASD	O. lupi female	0	0	0	0
2	27	TISRETKYEIAASDG	O. lupi female	0	0	0	0
2	28	ISRETKYEIAASDGD	O. lupi female	51.5	51.5	1	0
2	29	SRETKYEIAASDGDI	O. lupi female	0	0	0	0
2	30	RETKYEIAASDGDIG	O. lupi female	0	0	0	0
2	31	ETKYEIAASDGDIGT	O. lupi female	0	0	0	0
2	32	TKYEIAASDGDIGTD	O. lupi female	0	0	0	0
2	33	KYEIAASDGDIGTDN	O. lupi female	0	0	0	0
2	34	YEIAASDGDIGTDNI	O. lupi female	113	113	1	0
2	35	EIAASDGDIGTDNIE	O. lupi female	0	0	0	0
2	36	IAASDGDIGTDNIEY	O. lupi female	148	68	0.459459	0
2	37	AASDGDIGTDNIEYI	O. lupi female	380.5	69.5	0.182654	380.5
2	38	ASDGDIGTDNIEYID	O. lupi female	0	0	0	0
2	39	SDGDIGTDNIEYIDS	O. lupi female	0	0	0	0
2	40	DGDIGTDNIEYIDSV	O. lupi female	0	0	0	0
2	41	GDIGTDNIEYIDSVD	O. lupi female	0	0	0	0
2	42	DIGTDNIEYIDSVDS	O. lupi female	0	0	0	0
2	43	IGTDNIEYIDSVDST	O. lupi female	0	0	0	0
2	44	GTDNIEYIDSVDSTG	O. lupi female	0	0	0	0
2	45	TDNIEYIDSVDSTGL	O. lupi female	0	0	0	0
2	46	DNIEYIDSVDSTGLG	O. lupi female	0	0	0	0
2	47	NIEYIDSVDSTGLGY	O. lupi female	275.25	49.75	0.180745	275.25
2	48	IEYIDSVDSTGLGYG	O. lupi female	0	0	0	0
2	49	EYIDSVDSTGLGYGK	O. lupi female	0	0	0	0
2	50	YIDSVDSTGLGYGKT	O. lupi female	0	0	0	0
2	51	IDSVDSTGLGYGKTG	O. lupi female	0	0	0	0
2	52	DSVDSTGLGYGKTGE	O. lupi female	0	0	0	0
2	53	SVDSTGLGYGKTGEG	O. lupi female	0	0	0	0
2	54	VDSTGLGYGKTGEGI	O. lupi female	0	0	0	0
2	55	DSTGLGYGKTGEGIS	O. lupi female	0	0	0	0
2	56	STGLGYGKTGEGISR	O. lupi female	0	0	0	0
2	57	TGLGYGKTGEGISRI	O. lupi female	0	0	0	0
2	58	GLGYGKTGEGISRIL	O. lupi female	181	181	1	0
2	59	LGYGKTGEGISRILY	O. lupi female	440	18	0.0409091	440
2	60	GYGKTGEGISRILYE	O. lupi female	15.25	15.25	1	0
2	61	YGKTGEGISRILYEH	O. lupi female	490.25	344.25	0.702193	0
2	62	GKTGEGISRILYEHP	O. lupi female	280.5	85.5	0.304813	280.5
2	63	KTGEGISRILYEHPR	O. lupi female	618.5	221.5	0.358124	618.5
2	64	TGEGISRILYEHPRD	O. lupi female	194	167	0.860825	0
2	65	GEGISRILYEHPRDE	O. lupi female	0	0	0	0
2	66	EGISRILYEHPRDEL	O. lupi female	217.75	187.25	0.859931	0
2	67	GISRILYEHPRDELI	O. lupi female	90.75	5.75	0.0633609	90.75
4	2	ISRILYEHPRDELIN	O. lupi female	1651.25	236.25	0.143073	0
4	3	SRILYEHPRDELINY	O. lupi female	3495	330	0.0944206	3495
4	4	RILYEHPRDELINYK	O. lupi female	113.25	68.25	0.602649	0
4	5	ILYEHPRDELINYKR	O. lupi female	2168.25	244.75	0.112879	2168.25
4	6	LYEHPRDELINYKRR	O. lupi female	2352.5	336.5	0.143039	2352.5
4	7	YEHPRDELINYKRRI	O. lupi female	2188.5	63.5	0.0290153	2188.5
4	8	EHPRDELINYKRRID	O. lupi female	1952	16	0.00819672	1952
4	9	HPRDELINYKRRIDA	O. lupi female	724.5	71.5	0.0986888	724.5
4	10	PRDELINYKRRIDAN	O. lupi female	0	0	0	0
4	11	RDELINYKRRIDANT	O. lupi female	0	0	0	0
4	12	DELINYKRRIDANTE	O. lupi female	27.5	27.5	1	0
4	13	ELINYKRRIDANTEQ	O. lupi female	155.5	155.5	1	0
4	14	LINYKRRIDANTEQQ	O. lupi female	158.75	158.75	1	0
4	15	INYKRRIDANTEQQR	O. lupi female	246.5	246.5	1	0
4	16	NYKRRIDANTEQQRE	O. lupi female	72.5	72.5	1	0
4	17	YKRRIDANTEQQREH	O. lupi female	216	216	1	0
4	18	KRRIDANTEQQREHA	O. lupi female	0	0	0	0
4	19	RRIDANTEQQREHAD	O. lupi female	0	0	0	0
4	20	RIDANTEQQREHADI	O. lupi female	44	12	0.272727	44
4	21	IDANTEQQREHADIM	O. lupi female	0	0	0	0
4	22	DANTEQQREHADIMA	O. lupi female	132.75	132.75	1	0
4	23	ANTEQQREHADIMAA	O. lupi female	21	21	1	0
4	24	NTEQQREHADIMAAL	O. lupi female	2	2	1	0
4	25	TEQQREHADIMAALQ	O. lupi female	0	0	0	0
4	26	EQQREHADIMAALQR	O. lupi female	76.5	76.5	1	0
4	27	QQREHADIMAALQRK	O. lupi female	38	38	1	0
4	28	QREHADIMAALQRKI	O. lupi female	0	0	0	0
4	29	REHADIMAALQRKIE	O. lupi female	0	0	0	0
4	30	EHADIMAALQRKIEE	O. lupi female	0	0	0	0
4	31	HADIMAALQRKIEEY	O. lupi female	513.5	200.5	0.390458	513.5
4	32	ADIMAALQRKIEEYR	O. lupi female	878.5	122.5	0.139442	878.5
4	33	DIMAALQRKIEEYRR	O. lupi female	1181	34	0.0287892	1181
4	34	IMAALQRKIEEYRRR	O. lupi female	1142	21	0.0183888	1142
4	35	MAALQRKIEEYRRRF	O. lupi female	956.5	34.5	0.036069	956.5
4	36	AALQRKIEEYRRRFA	O. lupi female	0	0	0	0
4	37	ALQRKIEEYRRRFAE	O. lupi female	312	62	0.198718	312
4	38	LQRKIEEYRRRFAEI	O. lupi female	173.25	87.25	0.503608	0
4	39	QRKIEEYRRRFAEIE	O. lupi female	0	0	0	0
4	40	RKIEEYRRRFAEIEG	O. lupi female	0	0	0	0
4	41	KIEEYRRRFAEIEGR	O. lupi female	0	0	0	0
4	42	IEEYRRRFAEIEGRL	O. lupi female	236	70	0.29661	236
4	43	EEYRRRFAEIEGRLV	O. lupi female	70.5	64	0.907801	0
4	44	EYRRRFAEIEGRLVV	O. lupi female	168	168	1	0
4	45	YRRRFAEIEGRLVVH	O. lupi female	0	0	0	0
4	46	RRRFAEIEGRLVVHD	O. lupi female	0	0	0	0
4	47	RRFAEIEGRLVVHDL	O. lupi female	17	17	1	0
4	48	RFAEIEGRLVVHDLN	O. lupi female	0	0	0	0
4	49	FAEIEGRLVVHDLNE	O. lupi female	101	38	0.376238	101
4	50	AEIEGRLVVHDLNES	O. lupi female	0	0	0	0
4	51	EIEGRLVVHDLNESG	O. lupi female	47	47	1	0
4	52	IEGRLVVHDLNESGD	O. lupi female	0	0	0	0
4	53	EGRLVVHDLNESGDL	O. lupi female	180.75	174.25	0.964039	0
4	54	GRLVVHDLNESGDLV	O. lupi female	0.5	0.5	1	0
4	55	RLVVHDLNESGDLVN	O. lupi female	290.75	66.25	0.227859	290.75
4	56	LVVHDLNESGDLVNM	O. lupi female	240.25	240.25	1	0
4	57	VVHDLNESGDLVNMK	O. lupi female	103	103	1	0
4	58	VHDLNESGDLVNMKL	O. lupi female	693.5	179.5	0.258832	693.5
4	59	HDLNESGDLVNMKLK	O. lupi female	429.75	429.75	1	0
4	60	DLNESGDLVNMKLKE	O. lupi female	0	0	0	0
4	61	LNESGDLVNMKLKEE	O. lupi female	0	0	0	0
4	62	NESGDLVNMKLKEEW	O. lupi female	123.25	123.25	1	0
4	63	ESGDLVNMKLKEEWL	O. lupi female	209	104	0.497608	0
4	64	SGDLVNMKLKEEWLL	O. lupi female	429.75	36.25	0.0843514	429.75
4	65	GDLVNMKLKEEWLLS	O. lupi female	0	0	0	0
4	66	DLVNMKLKEEWLLSP	O. lupi female	3	3	1	0
4	67	LVNMKLKEEWLLSPK	O. lupi female	0	0	0	0
6	2	VNMKLKEEWLLSPKF	O. lupi female	56.25	56.25	1	0
6	3	NMKLKEEWLLSPKFK	O. lupi female	0	0	0	0
6	4	MKLKEEWLLSPKFKM	O. lupi female	0	0	0	0
6	5	KLKEEWLLSPKFKME	O. lupi female	0	0	0	0
6	6	LKEEWLLSPKFKMEE	O. lupi female	0	0	0	0
6	7	KEEWLLSPKFKMEEI	O. lupi female	0	0	0	0
6	8	EEWLLSPKFKMEEIG	O. lupi female	21	21	1	0
6	9	EWLLSPKFKMEEIGD	O. lupi female	0	0	0	0
6	10	WLLSPKFKMEEIGDV	O. lupi female	0	0	0	0
6	11	LLSPKFKMEEIGDVD	O. lupi female	356.25	213.25	0.598596	0
6	12	LSPKFKMEEIGDVDF	O. lupi female	211	211	1	0
6	13	SPKFKMEEIGDVDFA	O. lupi female	0	0	0	0
6	14	PKFKMEEIGDVDFAN	O. lupi female	422.5	422.5	1	0
6	15	KFKMEEIGDVDFANQ	O. lupi female	0	0	0	0
6	16	FKMEEIGDVDFANQL	O. lupi female	919.5	93.5	0.101686	919.5
6	17	KMEEIGDVDFANQLE	O. lupi female	3.5	3.5	1	0
6	18	MEEIGDVDFANQLED	O. lupi female	13	13	1	0
6	19	EEIGDVDFANQLEDE	O. lupi female	0	0	0	0
6	20	EIGDVDFANQLEDER	O. lupi female	0	0	0	0
6	21	IGDVDFANQLEDERR	O. lupi female	410	164	0.4	410
6	22	GDVDFANQLEDERRR	O. lupi female	636	233	0.366352	636
6	23	DVDFANQLEDERRRA	O. lupi female	0	0	0	0
6	24	VDFANQLEDERRRAE	O. lupi female	0	0	0	0
6	25	DFANQLEDERRRAED	O. lupi female	0	0	0	0
6	26	FANQLEDERRRAEDL	O. lupi female	0	0	0	0
6	27	ANQLEDERRRAEDLA	O. lupi female	0	0	0	0
6	28	NQLEDERRRAEDLAI	O. lupi female	0	0	0	0
6	29	QLEDERRRAEDLAIQ	O. lupi female	20	20	1	0
6	30	LEDERRRAEDLAIQL	O. lupi female	496.25	313.75	0.632242	0
6	31	EDERRRAEDLAIQLQ	O. lupi female	0	0	0	0
6	32	DERRRAEDLAIQLQQ	O. lupi female	0	0	0	0
6	33	ERRRAEDLAIQLQQE	O. lupi female	0	0	0	0
6	34	RRRAEDLAIQLQQER	O. lupi female	68.75	68.75	1	0
6	35	RRAEDLAIQLQQERL	O. lupi female	8.5	8.5	1	0
6	36	RAEDLAIQLQQERLQ	O. lupi female	218.5	218.5	1	0
6	37	AEDLAIQLQQERLQN	O. lupi female	26.75	26.75	1	0
6	38	EDLAIQLQQERLQND	O. lupi female	0	0	0	0
6	39	DLAIQLQQERLQNDQ	O. lupi female	572	399	0.697552	0
6	40	LAIQLQQERLQNDQL	O. lupi female	539	79	0.146568	539
6	41	AIQLQQERLQNDQLQ	O. lupi female	0	0	0	0
6	42	IQLQQERLQNDQLQS	O. lupi female	0	0	0	0
6	43	QLQQERLQNDQLQSE	O. lupi female	0	0	0	0
6	44	LQQERLQNDQLQSEI	O. lupi female	0	0	0	0
6	45	QQERLQNDQLQSEIQ	O. lupi female	0	0	0	0
6	46	QERLQNDQLQSEIQR	O. lupi female	36.75	36.75	1	0
6	47	ERLQNDQLQSEIQRL	O. lupi female	889.5	3.5	0.00393479	889.5
6	48	RLQNDQLQSEIQRLR	O. lupi female	7.5	7.5	1	0
6	49	LQNDQLQSEIQRLRQ	O. lupi female	0	0	0	0
6	50	QNDQLQSEIQRLRQQ	O. lupi female	744	105	0.141129	744
6	51	NDQLQSEIQRLRQQF	O. lupi female	869.5	3.5	0.0040253	869.5
6	52	DQLQSEIQRLRQQFG	O. lupi female	0	0	0	0
6	53	QLQSEIQRLRQQFGI	O. lupi female	0	0	0	0
6	54	LQSEIQRLRQQFGIS	O. lupi female	316	316	1	0
6	55	QSEIQRLRQQFGISI	O. lupi female	11.5	11.5	1	0
6	56	SEIQRLRQQFGISIR	O. lupi female	46.25	46.25	1	0
6	57	EIQRLRQQFGISIRD	O. lupi female	352.75	128.25	0.363572	352.75
6	58	IQRLRQQFGISIRDK	O. lupi female	0	0	0	0
6	59	QRLRQQFGISIRDKE	O. lupi female	0	0	0	0
6	60	RLRQQFGISIRDKER	O. lupi female	0	0	0	0
6	61	LRQQFGISIRDKERI	O. lupi female	0	0	0	0
6	62	RQQFGISIRDKERIY	O. lupi female	97.25	83.25	0.856041	0
6	63	QQFGISIRDKERIYQ	O. lupi female	0	0	0	0
6	64	QFGISIRDKERIYQT	O. lupi female	0	0	0	0
6	65	FGISIRDKERIYQTR	O. lupi female	0	0	0	0
6	66	GISIRDKERIYQTRE	O. lupi female	0	0	0	0
6	67	ISIRDKERIYQTRER	O. lupi female	135.25	135.25	1	0
8	2	SIRDKERIYQTRERN	O. lupi female	642.5	52.5	0.0817121	642.5
8	3	IRDKERIYQTRERNF	O. lupi female	825.5	18.5	0.0224107	825.5
8	4	RDKERIYQTRERNFT	O. lupi female	0	0	0	0
8	5	DKERIYQTRERNFTR	O. lupi female	336.5	336.5	1	0
8	6	KERIYQTRERNFTRY	O. lupi female	370.25	192.75	0.520594	0
8	7	ERIYQTRERNFTRYL	O. lupi female	1437	175	0.121781	1437
8	8	RIYQTRERNFTRYLG	O. lupi female	0	0	0	0
8	9	IYQTRERNFTRYLGE	O. lupi female	0	0	0	0
8	10	YQTRERNFTRYLGEE	O. lupi female	0	0	0	0
8	11	QTRERNFTRYLGEEQ	O. lupi female	0	0	0	0
8	12	TRERNFTRYLGEEQR	O. lupi female	249.25	249.25	1	0
8	13	RERNFTRYLGEEQRK	O. lupi female	0	0	0	0
8	14	ERNFTRYLGEEQRKM	O. lupi female	0	0	0	0
8	15	RNFTRYLGEEQRKMM	O. lupi female	0	0	0	0
8	16	NFTRYLGEEQRKMME	O. lupi female	0	0	0	0
8	17	FTRYLGEEQRKMMEL	O. lupi female	437.25	20.75	0.0474557	437.25
8	18	TRYLGEEQRKMMELW	O. lupi female	1248	277	0.221955	1248
8	19	RYLGEEQRKMMELWS	O. lupi female	197.5	197.5	1	0
8	20	YLGEEQRKMMELWSE	O. lupi female	112	112	1	0
8	21	LGEEQRKMMELWSEL	O. lupi female	595.25	198.25	0.333053	595.25
8	22	GEEQRKMMELWSELQ	O. lupi female	169	150	0.887574	0
8	23	EEQRKMMELWSELQR	O. lupi female	649.75	194.25	0.298961	649.75
8	24	EQRKMMELWSELQRV	O. lupi female	802	13	0.0162095	802
8	25	QRKMMELWSELQRVR	O. lupi female	303	102	0.336634	303
8	26	RKMMELWSELQRVRK	O. lupi female	28.75	28.75	1	0
8	27	KMMELWSELQRVRKQ	O. lupi female	0	0	0	0
8	28	MMELWSELQRVRKQC	O. lupi female	0	0	0	0
8	29	MELWSELQRVRKQCA	O. lupi female	0	0	0	0
8	30	ELWSELQRVRKQCAE	O. lupi female	0	0	0	0
8	31	LWSELQRVRKQCAEY	O. lupi female	157	66	0.420382	0
8	32	WSELQRVRKQCAEYR	O. lupi female	31	31	1	0
8	33	SELQRVRKQCAEYRE	O. lupi female	515.5	303.5	0.588749	0
8	34	ELQRVRKQCAEYREQ	O. lupi female	45	45	1	0
8	35	LQRVRKQCAEYREQT	O. lupi female	0	0	0	0
8	36	QRVRKQCAEYREQTE	O. lupi female	0	0	0	0
8	37	RVRKQCAEYREQTER	O. lupi female	83.25	83.25	1	0
8	38	VRKQCAEYREQTERD	O. lupi female	405	51	0.125926	405
8	39	RKQCAEYREQTERDL	O. lupi female	0	0	0	0
8	40	KQCAEYREQTERDLE	O. lupi female	0	0	0	0
8	41	QCAEYREQTERDLEN	O. lupi female	0	0	0	0
8	42	CAEYREQTERDLENQ	O. lupi female	0	0	0	0
8	43	AEYREQTERDLENQR	O. lupi female	393.75	80.75	0.205079	393.75
8	44	EYREQTERDLENQRN	O. lupi female	221	190	0.859729	0
8	45	YREQTERDLENQRNE	O. lupi female	0	0	0	0
8	46	REQTERDLENQRNEF	O. lupi female	457.5	154.5	0.337705	457.5
8	47	EQTERDLENQRNEFI	O. lupi female	526.5	366.5	0.696106	0
8	48	QTERDLENQRNEFIK	O. lupi female	0	0	0	0
8	49	TERDLENQRNEFIKV	O. lupi female	0	0	0	0
8	50	ERDLENQRNEFIKVI	O. lupi female	0	0	0	0
8	51	RDLENQRNEFIKVIR	O. lupi female	1172.75	127.75	0.108932	1172.75
8	52	DLENQRNEFIKVIRH	O. lupi female	1294.75	92.25	0.0712493	1294.75
8	53	LENQRNEFIKVIRHV	O. lupi female	292.5	200.5	0.68547	0
8	54	ENQRNEFIKVIRHVS	O. lupi female	0	0	0	0
8	55	NQRNEFIKVIRHVSG	O. lupi female	0	0	0	0
8	56	QRNEFIKVIRHVSGI	O. lupi female	74.5	74.5	1	0
8	57	RNEFIKVIRHVSGIV	O. lupi female	286	286	1	0
8	58	NEFIKVIRHVSGIVR	O. lupi female	440.5	302.5	0.68672	0
8	59	EFIKVIRHVSGIVRG	O. lupi female	290.75	108.75	0.374033	290.75
8	60	FIKVIRHVSGIVRGL	O. lupi female	1.25	1.25	1	0
8	61	IKVIRHVSGIVRGLN	O. lupi female	0	0	0	0
8	62	KVIRHVSGIVRGLNI	O. lupi female	0	0	0	0
8	63	VIRHVSGIVRGLNIE	O. lupi female	0	0	0	0
8	64	IRHVSGIVRGLNIEN	O. lupi female	71.5	71.5	1	0
8	65	RHVSGIVRGLNIENG	O. lupi female	88.25	88.25	1	0
8	66	HVSGIVRGLNIENGT	O. lupi female	17.25	17.25	1	0
8	67	VSGIVRGLNIENGTH	O. lupi female	0	0	0	0
10	2	SGIVRGLNIENGTHT	O. lupi female	0	0	0	0
10	3	GIVRGLNIENGTHTL	O. lupi female	51.5	51.5	1	0
10	4	IVRGLNIENGTHTLL	O. lupi female	56.25	56.25	1	0
10	5	VRGLNIENGTHTLLS	O. lupi female	0	0	0	0
10	6	RGLNIENGTHTLLSD	O. lupi female	47	47	1	0
10	7	GLNIENGTHTLLSDL	O. lupi female	185.5	29.5	0.15903	185.5
10	8	LNIENGTHTLLSDLS	O. lupi female	19	19	1	0
10	9	NIENGTHTLLSDLSS	O. lupi female	0	0	0	0
10	10	IENGTHTLLSDLSSE	O. lupi female	23.5	23.5	1	0
10	11	ENGTHTLLSDLSSES	O. lupi female	0	0	0	0
10	12	NGTHTLLSDLSSESG	O. lupi female	0	0	0	0
10	13	GTHTLLSDLSSESGV	O. lupi female	0	0	0	0
10	14	THTLLSDLSSESGVE	O. lupi female	0	0	0	0
10	15	HTLLSDLSSESGVEI	O. lupi female	0	0	0	0
10	16	TLLSDLSSESGVEIT	O. lupi female	0	0	0	0
10	17	LLSDLSSESGVEITQ	O. lupi female	3.5	3.5	1	0
10	18	LSDLSSESGVEITQD	O. lupi female	52	52	1	0
10	19	SDLSSESGVEITQDT	O. lupi female	0	0	0	0
10	20	DLSSESGVEITQDTV	O. lupi female	0	0	0	0
10	21	LSSESGVEITQDTVL	O. lupi female	0	0	0	0
10	22	SSESGVEITQDTVLI	O. lupi female	0	0	0	0
10	23	SESGVEITQDTVLIE	O. lupi female	32.5	32.5	1	0
10	24	ESGVEITQDTVLIEA	O. lupi female	0	0	0	0
10	25	SGVEITQDTVLIEAV	O. lupi female	0	0	0	0
10	26	GVEITQDTVLIEAVK	O. lupi female	0	0	0	0
10	27	VEITQDTVLIEAVKR	O. lupi female	0	0	0	0
10	28	EITQDTVLIEAVKRF	O. lupi female	379.5	134.5	0.354414	379.5
10	29	ITQDTVLIEAVKRFH	O. lupi female	124	68	0.548387	0
10	30	TQDTVLIEAVKRFHE	O. lupi female	0	0	0	0
10	31	QDTVLIEAVKRFHES	O. lupi female	0	0	0	0
10	32	DTVLIEAVKRFHESQ	O. lupi female	86.25	86.25	1	0
10	33	TVLIEAVKRFHESQQ	O. lupi female	78.75	78.75	1	0
10	34	VLIEAVKRFHESQQQ	O. lupi female	140.5	5.5	0.0391459	140.5
10	35	LIEAVKRFHESQQQA	O. lupi female	0	0	0	0
10	36	IEAVKRFHESQQQAA	O. lupi female	156.5	156.5	1	0
10	37	EAVKRFHESQQQAAP	O. lupi female	1045.75	97.75	0.0934736	1045.75
10	38	AVKRFHESQQQAAPV	O. lupi female	114.5	114.5	1	0
10	39	VKRFHESQQQAAPVI	O. lupi female	0	0	0	0
10	40	KRFHESQQQAAPVIG	O. lupi female	120	120	1	0
10	41	RFHESQQQAAPVIGP	O. lupi female	242.25	152.75	0.630547	0
10	42	FHESQQQAAPVIGPE	O. lupi female	528.75	290.25	0.548936	0
10	43	HESQQQAAPVIGPEL	O. lupi female	363.75	312.25	0.858419	0
10	44	ESQQQAAPVIGPELI	O. lupi female	531	183	0.344633	531
10	45	SQQQAAPVIGPELIT	O. lupi female	0	0	0	0
10	46	QQQAAPVIGPELITE	O. lupi female	52.5	52.5	1	0
10	47	QQAAPVIGPELITEL	O. lupi female	0	0	0	0
10	48	QAAPVIGPELITELR	O. lupi female	213.5	97.5	0.456674	0
10	49	AAPVIGPELITELRL	O. lupi female	151.5	121.5	0.80198	0
10	50	APVIGPELITELRLA	O. lupi female	0	0	0	0
10	51	PVIGPELITELRLAR	O. lupi female	91.5	91.5	1	0
10	52	VIGPELITELRLART	O. lupi female	0	0	0	0
10	53	IGPELITELRLARTE	O. lupi female	0	0	0	0
10	54	GPELITELRLARTED	O. lupi female	0	0	0	0
10	55	PELITELRLARTEDA	O. lupi female	0	0	0	0
10	56	ELITELRLARTEDAG	O. lupi female	0	0	0	0
10	57	LITELRLARTEDAGL	O. lupi female	0	0	0	0
10	58	ITELRLARTEDAGLH	O. lupi female	0	0	0	0
10	59	TELRLARTEDAGLHD	O. lupi female	0	0	0	0
10	60	ELRLARTEDAGLHDE	O. lupi female	0	0	0	0
10	61	LRLARTEDAGLHDEL	O. lupi female	0	0	0	0
10	62	RLARTEDAGLHDELM	O. lupi female	0	0	0	0
10	63	LARTEDAGLHDELMR	O. lupi female	367.5	2	0.00544218	367.5
10	64	ARTEDAGLHDELMRK	O. lupi female	434.5	300.5	0.6916	0
10	65	RTEDAGLHDELMRKY	O. lupi female	28.5	28.5	1	0
10	66	TEDAGLHDELMRKYE	O. lupi female	0	0	0	0
10	67	EDAGLHDELMRKYEE	O. lupi female	762.25	208.25	0.273204	762.25
12	2	DAGLHDELMRKYEES	O. lupi female	312	312	1	0
12	3	AGLHDELMRKYEESA	O. lupi female	461	287	0.62256	0
12	4	GLHDELMRKYEESAK	O. lupi female	0	0	0	0
12	5	LHDELMRKYEESAKR	O. lupi female	250	250	1	0
12	6	HDELMRKYEESAKRI	O. lupi female	100	86	0.86	0
12	7	DELMRKYEESAKRII	O. lupi female	267.25	267.25	1	0
12	8	ELMRKYEESAKRIIE	O. lupi female	278	278	1	0
12	9	LMRKYEESAKRIIEL	O. lupi female	246.5	183.5	0.744422	0
12	10	MRKYEESAKRIIELE	O. lupi female	816.25	63.25	0.0774885	816.25
12	11	RKYEESAKRIIELEA	O. lupi female	0	0	0	0
12	12	KYEESAKRIIELEAR	O. lupi female	375.25	375.25	1	0
12	13	YEESAKRIIELEARD	O. lupi female	221.75	221.75	1	0
12	14	EESAKRIIELEARDD	O. lupi female	0	0	0	0
12	15	ESAKRIIELEARDDE	O. lupi female	0	0	0	0
12	16	SAKRIIELEARDDES	O. lupi female	112	112	1	0
12	17	AKRIIELEARDDESH	O. lupi female	746.5	568.5	0.761554	0
12	18	KRIIELEARDDESHN	O. lupi female	120	120	1	0
12	19	RIIELEARDDESHNK	O. lupi female	135	135	1	0
12	20	IIELEARDDESHNKL	O. lupi female	148.25	148.25	1	0
12	21	IELEARDDESHNKLV	O. lupi female	49	49	1	0
12	22	ELEARDDESHNKLVA	O. lupi female	978	463	0.473415	0
12	23	LEARDDESHNKLVAL	O. lupi female	336.25	54.75	0.162825	336.25
12	24	EARDDESHNKLVALE	O. lupi female	0	0	0	0
12	25	ARDDESHNKLVALES	O. lupi female	0	0	0	0
12	26	RDDESHNKLVALESD	O. lupi female	0	0	0	0
12	27	DDESHNKLVALESDL	O. lupi female	496.25	26.25	0.0528967	496.25
12	28	DESHNKLVALESDLK	O. lupi female	1.5	1.5	1	0
12	29	ESHNKLVALESDLKR	O. lupi female	0	0	0	0
12	30	SHNKLVALESDLKRT	O. lupi female	0	0	0	0
12	31	HNKLVALESDLKRTR	O. lupi female	0	0	0	0
12	32	NKLVALESDLKRTRD	O. lupi female	0	0	0	0
12	33	KLVALESDLKRTRDR	O. lupi female	238	147	0.617647	0
12	34	LVALESDLKRTRDRL	O. lupi female	398.25	82.75	0.207784	398.25
12	35	VALESDLKRTRDRLA	O. lupi female	0	0	0	0
12	36	ALESDLKRTRDRLAE	O. lupi female	0	0	0	0
12	37	LESDLKRTRDRLAES	O. lupi female	0	0	0	0
12	38	ESDLKRTRDRLAESQ	O. lupi female	0	0	0	0
12	39	SDLKRTRDRLAESQN	O. lupi female	203	203	1	0
12	40	DLKRTRDRLAESQNA	O. lupi female	313	313	1	0
12	41	LKRTRDRLAESQNAL	O. lupi female	27.75	27.75	1	0
12	42	KRTRDRLAESQNALR	O. lupi female	0	0	0	0
12	43	RTRDRLAESQNALRK	O. lupi female	0	0	0	0
12	44	TRDRLAESQNALRKL	O. lupi female	298.75	298.75	1	0
12	45	RDRLAESQNALRKLY	O. lupi female	399.25	122.25	0.306199	399.25
12	46	DRLAESQNALRKLYD	O. lupi female	66.75	32.25	0.483146	0
12	47	RLAESQNALRKLYDM	O. lupi female	48	48	1	0
12	48	LAESQNALRKLYDMT	O. lupi female	0	0	0	0
12	49	AESQNALRKLYDMTY	O. lupi female	72.5	72.5	1	0
12	50	ESQNALRKLYDMTYS	O. lupi female	0	0	0	0
12	51	SQNALRKLYDMTYSY	O. lupi female	586.75	134.75	0.229655	586.75
12	52	QNALRKLYDMTYSYE	O. lupi female	76.25	76.25	1	0
12	53	NALRKLYDMTYSYEI	O. lupi female	796	44	0.0552764	796
12	54	ALRKLYDMTYSYEIN	O. lupi female	0	0	0	0
12	55	LRKLYDMTYSYEINA	O. lupi female	0	0	0	0
12	56	RKLYDMTYSYEINAE	O. lupi female	0	0	0	0
12	57	KLYDMTYSYEINAEK	O. lupi female	0	0	0	0
12	58	LYDMTYSYEINAEKE	O. lupi female	1490.25	361.75	0.242745	1490.25
12	59	YDMTYSYEINAEKET	O. lupi female	0	0	0	0
12	60	DMTYSYEINAEKETR	O. lupi female	62	62	1	0
12	61	MTYSYEINAEKETRS	O. lupi female	0	0	0	0
12	62	TYSYEINAEKETRSP	O. lupi female	0	0	0	0
12	63	YSYEINAEKETRSPS	O. lupi female	0	0	0	0
12	64	SYEINAEKETRSPSP	O. lupi female	0	0	0	0
12	65	YEINAEKETRSPSPA	O. lupi female	0	0	0	0
12	66	EINAEKETRSPSPAK	O. lupi female	0	0	0	0
12	67	INAEKETRSPSPAKG	O. lupi female	0	0	0	0
14	2	NAEKETRSPSPAKGY	O. lupi female	2	2	1	0
14	3	AEKETRSPSPAKGYV	O. lupi female	0	0	0	0
14	4	EKETRSPSPAKGYVP	O. lupi female	642.25	642.25	1	0
14	5	KETRSPSPAKGYVPP	O. lupi female	71.5	71.5	1	0
14	6	ETRSPSPAKGYVPPP	O. lupi female	0	0	0	0
14	7	TRSPSPAKGYVPPPE	O. lupi female	0	0	0	0
14	8	RSPSPAKGYVPPPEV	O. lupi female	0	0	0	0
14	9	SPSPAKGYVPPPEVV	O. lupi female	0	0	0	0
14	10	PSPAKGYVPPPEVVR	O. lupi female	0	0	0	0
14	11	SPAKGYVPPPEVVRS	O. lupi female	129.5	88.5	0.683398	0
14	12	PAKGYVPPPEVVRSV	O. lupi female	238.5	238.5	1	0
14	13	AKGYVPPPEVVRSVR	O. lupi female	248	248	1	0
14	14	KGYVPPPEVVRSVRY	O. lupi female	1025.25	334.75	0.326506	1025.25
14	15	GYVPPPEVVRSVRYV	O. lupi female	1982.5	83.5	0.0421185	1982.5
14	16	YVPPPEVVRSVRYVL	O. lupi female	1838.25	200.75	0.109207	1838.25
14	17	VPPPEVVRSVRYVLN	O. lupi female	55.5	55.5	1	0
14	18	PPPEVVRSVRYVLNS	O. lupi female	0	0	0	0
14	19	PPEVVRSVRYVLNSR	O. lupi female	0	0	0	0
14	20	PEVVRSVRYVLNSRA	O. lupi female	0	0	0	0
14	21	EVVRSVRYVLNSRAN	O. lupi female	504	504	1	0
14	22	VVRSVRYVLNSRAND	O. lupi female	0	0	0	0
14	23	VRSVRYVLNSRANDN	O. lupi female	0	0	0	0
14	24	RSVRYVLNSRANDNN	O. lupi female	163	163	1	0
14	25	SVRYVLNSRANDNNV	O. lupi female	0	0	0	0
14	26	VRYVLNSRANDNNVL	O. lupi female	305.5	83.5	0.273322	305.5
14	27	RYVLNSRANDNNVLQ	O. lupi female	65	65	1	0
14	28	YVLNSRANDNNVLQR	O. lupi female	350	350	1	0
14	29	VLNSRANDNNVLQRK	O. lupi female	0	0	0	0
14	30	LNSRANDNNVLQRKL	O. lupi female	0	0	0	0
14	31	NSRANDNNVLQRKLK	O. lupi female	0	0	0	0
14	32	SRANDNNVLQRKLKN	O. lupi female	0	0	0	0
14	33	RANDNNVLQRKLKNA	O. lupi female	0	0	0	0
14	34	ANDNNVLQRKLKNAE	O. lupi female	0	0	0	0
14	35	NDNNVLQRKLKNAEI	O. lupi female	0	0	0	0
14	36	DNNVLQRKLKNAEIQ	O. lupi female	0	0	0	0
14	37	NNVLQRKLKNAEIQI	O. lupi female	0	0	0	0
14	38	NVLQRKLKNAEIQIS	O. lupi female	0	0	0	0
14	39	VLQRKLKNAEIQISE	O. lupi female	64	64	1	0
14	40	LQRKLKNAEIQISEL	O. lupi female	0	0	0	0
14	41	QRKLKNAEIQISELT	O. lupi female	0	0	0	0
14	42	RKLKNAEIQISELTN	O. lupi female	0	0	0	0
14	43	KLKNAEIQISELTNK	O. lupi female	54	36	0.666667	0
14	44	LKNAEIQISELTNKN	O. lupi female	0	0	0	0
14	45	KNAEIQISELTNKND	O. lupi female	0	0	0	0
14	46	NAEIQISELTNKNDS	O. lupi female	0	0	0	0
14	47	AEIQISELTNKNDSL	O. lupi female	0	0	0	0
14	48	EIQISELTNKNDSLE	O. lupi female	0	0	0	0
14	49	IQISELTNKNDSLEE	O. lupi female	0	0	0	0
14	50	QISELTNKNDSLEEI	O. lupi female	9.5	9.5	1	0
14	51	ISELTNKNDSLEEIR	O. lupi female	0	0	0	0
14	52	SELTNKNDSLEEIRR	O. lupi female	0	0	0	0
14	53	ELTNKNDSLEEIRRR	O. lupi female	218.5	218.5	1	0
14	54	LTNKNDSLEEIRRRL	O. lupi female	0	0	0	0
14	55	TNKNDSLEEIRRRLE	O. lupi female	0	0	0	0
14	56	NKNDSLEEIRRRLEK	O. lupi female	0	0	0	0
14	57	KNDSLEEIRRRLEKQ	O. lupi female	110.25	110.25	1	0
14	58	NDSLEEIRRRLEKQI	O. lupi female	30	30	1	0
14	59	DSLEEIRRRLEKQIA	O. lupi female	670.75	229.75	0.342527	670.75
14	60	SLEEIRRRLEKQIAE	O. lupi female	0	0	0	0
14	61	LEEIRRRLEKQIAEA	O. lupi female	3	3	1	0
14	62	EEIRRRLEKQIAEAN	O. lupi female	330.75	132.75	0.401361	0
14	63	EIRRRLEKQIAEANR	O. lupi female	69.25	45.25	0.65343	0
14	64	IRRRLEKQIAEANRT	O. lupi female	216.75	2.75	0.0126874	216.75
14	65	RRRLEKQIAEANRTI	O. lupi female	0	0	0	0
14	66	RRLEKQIAEANRTIT	O. lupi female	0	0	0	0
14	67	RLEKQIAEANRTITH	O. lupi female	64	64	1	0
16	2	LEKQIAEANRTITHR	O. lupi female	152.75	152.75	1	0
16	3	EKQIAEANRTITHRQ	O. lupi female	0	0	0	0
16	4	KQIAEANRTITHRQR	O. lupi female	0	0	0	0
16	5	QIAEANRTITHRQRE	O. lupi female	75.5	75.5	1	0
16	6	IAEANRTITHRQREL	O. lupi female	312	26	0.0833333	312
16	7	AEANRTITHRQRELD	O. lupi female	175.5	124.5	0.709402	0
16	8	EANRTITHRQRELDD	O. lupi female	137.5	137.5	1	0
16	9	ANRTITHRQRELDDA	O. lupi female	257	257	1	0
16	10	NRTITHRQRELDDAK	O. lupi female	0	0	0	0
16	11	RTITHRQRELDDAKH	O. lupi female	86	86	1	0
16	12	TITHRQRELDDAKHT	O. lupi female	0	0	0	0
16	13	ITHRQRELDDAKHTV	O. lupi female	0	0	0	0
16	14	THRQRELDDAKHTVK	O. lupi female	0	0	0	0
16	15	HRQRELDDAKHTVKD	O. lupi female	0	0	0	0
16	16	RQRELDDAKHTVKDL	O. lupi female	0	0	0	0
16	17	QRELDDAKHTVKDLE	O. lupi female	0	0	0	0
16	18	RELDDAKHTVKDLED	O. lupi female	127	127	1	0
16	19	ELDDAKHTVKDLEDR	O. lupi female	96.25	96.25	1	0
16	20	LDDAKHTVKDLEDRL	O. lupi female	40.25	40.25	1	0
16	21	DDAKHTVKDLEDRLR	O. lupi female	517.5	517.5	1	0
16	22	DAKHTVKDLEDRLRS	O. lupi female	563.5	492.5	0.874002	0
16	23	AKHTVKDLEDRLRSL	O. lupi female	0.5	0.5	1	0
16	24	KHTVKDLEDRLRSLE	O. lupi female	23	23	1	0
16	25	HTVKDLEDRLRSLEQ	O. lupi female	332.75	332.75	1	0
16	26	TVKDLEDRLRSLEQE	O. lupi female	0	0	0	0
16	27	VKDLEDRLRSLEQEK	O. lupi female	0	0	0	0
16	28	KDLEDRLRSLEQEKA	O. lupi female	0	0	0	0
16	29	DLEDRLRSLEQEKAS	O. lupi female	5.25	5.25	1	0
16	30	LEDRLRSLEQEKASI	O. lupi female	372	372	1	0
16	31	EDRLRSLEQEKASID	O. lupi female	0	0	0	0
16	32	DRLRSLEQEKASIDS	O. lupi female	37	37	1	0
16	33	RLRSLEQEKASIDSA	O. lupi female	0	0	0	0
16	34	LRSLEQEKASIDSAR	O. lupi female	0	0	0	0
16	35	RSLEQEKASIDSARH	O. lupi female	800.5	104.5	0.130543	800.5
16	36	SLEQEKASIDSARHH	O. lupi female	617.5	8	0.0129555	617.5
16	37	LEQEKASIDSARHHL	O. lupi female	628.5	118	0.187749	628.5
16	38	EQEKASIDSARHHLE	O. lupi female	88	88	1	0
16	39	QEKASIDSARHHLED	O. lupi female	0	0	0	0
16	40	EKASIDSARHHLEDE	O. lupi female	0	0	0	0
16	41	KASIDSARHHLEDEI	O. lupi female	88.5	88.5	1	0
16	42	ASIDSARHHLEDEIR	O. lupi female	210.25	184.75	0.878716	0
16	43	SIDSARHHLEDEIRK	O. lupi female	0	0	0	0
16	44	IDSARHHLEDEIRKM	O. lupi female	488.25	147.75	0.302611	488.25
16	45	DSARHHLEDEIRKMR	O. lupi female	0	0	0	0
16	46	SARHHLEDEIRKMRE	O. lupi female	520.5	19.5	0.037464	520.5
16	47	ARHHLEDEIRKMREQ	O. lupi female	1371.5	480.5	0.350346	0
16	48	RHHLEDEIRKMREQF	O. lupi female	3180.5	263.5	0.0828486	3180.5
16	49	HHLEDEIRKMREQFN	O. lupi female	1693	44	0.0259894	1693
16	50	HLEDEIRKMREQFNS	O. lupi female	85	85	1	0
16	51	LEDEIRKMREQFNST	O. lupi female	0	0	0	0
16	52	EDEIRKMREQFNSTL	O. lupi female	5.25	5.25	1	0
16	53	DEIRKMREQFNSTLL	O. lupi female	79.25	79.25	1	0
16	54	EIRKMREQFNSTLLD	O. lupi female	70	60	0.857143	0
16	55	IRKMREQFNSTLLDV	O. lupi female	219.75	170.25	0.774744	0
16	56	RKMREQFNSTLLDVE	O. lupi female	0	0	0	0
16	57	KMREQFNSTLLDVER	O. lupi female	78.5	78.5	1	0
16	58	MREQFNSTLLDVERR	O. lupi female	820	119	0.145122	820
16	59	REQFNSTLLDVERRA	O. lupi female	65.5	65.5	1	0
16	60	EQFNSTLLDVERRAA	O. lupi female	0	0	0	0
16	61	QFNSTLLDVERRAAE	O. lupi female	0	0	0	0
16	62	FNSTLLDVERRAAED	O. lupi female	0	0	0	0
16	63	NSTLLDVERRAAEDA	O. lupi female	74.25	74.25	1	0
16	64	STLLDVERRAAEDAD	O. lupi female	0	0	0	0
16	65	TLLDVERRAAEDADE	O. lupi female	37.5	37.5	1	0
16	66	LLDVERRAAEDADER	O. lupi female	0	0	0	0
16	67	LDVERRAAEDADERI	O. lupi female	538	124.5	0.231413	538
18	2	DVERRAAEDADERIR	O. lupi female	125	125	1	0
18	3	VERRAAEDADERIRK	O. lupi female	172.75	172.75	1	0
18	4	ERRAAEDADERIRKI	O. lupi female	0	0	0	0
18	5	RRAAEDADERIRKID	O. lupi female	0	0	0	0
18	6	RAAEDADERIRKIDE	O. lupi female	0	0	0	0
18	7	AAEDADERIRKIDEE	O. lupi female	0	0	0	0
18	8	AEDADERIRKIDEET	O. lupi female	0	0	0	0
18	9	EDADERIRKIDEETK	O. lupi female	0	0	0	0
18	10	DADERIRKIDEETKI	O. lupi female	71.5	71.5	1	0
18	11	ADERIRKIDEETKIR	O. lupi female	362.5	76.5	0.211034	362.5
18	12	DERIRKIDEETKIRI	O. lupi female	12.75	12.75	1	0
18	13	ERIRKIDEETKIRIS	O. lupi female	0	0	0	0
18	14	RIRKIDEETKIRISE	O. lupi female	0	0	0	0
18	15	IRKIDEETKIRISEL	O. lupi female	0	0	0	0
18	16	RKIDEETKIRISELT	O. lupi female	0	0	0	0
18	17	KIDEETKIRISELTN	O. lupi female	0	0	0	0
18	18	IDEETKIRISELTNR	O. lupi female	188.5	182.5	0.96817	0
18	19	DEETKIRISELTNRI	O. lupi female	226.5	226.5	1	0
18	20	EETKIRISELTNRIE	O. lupi female	34	34	1	0
18	21	ETKIRISELTNRIEM	O. lupi female	57.5	54.5	0.947826	0
18	22	TKIRISELTNRIEML	O. lupi female	200	171	0.855	0
18	23	KIRISELTNRIEMLL	O. lupi female	633.5	57.5	0.0907656	633.5
18	24	IRISELTNRIEMLLE	O. lupi female	0	0	0	0
18	25	RISELTNRIEMLLEE	O. lupi female	21	21	1	0
18	26	ISELTNRIEMLLEEN	O. lupi female	0	0	0	0
18	27	SELTNRIEMLLEENK	O. lupi female	0	0	0	0
18	28	ELTNRIEMLLEENKR	O. lupi female	504.25	276.25	0.547843	0
18	29	LTNRIEMLLEENKRL	O. lupi female	409	5	0.0122249	409
18	30	TNRIEMLLEENKRLK	O. lupi female	0	0	0	0
18	31	NRIEMLLEENKRLKD	O. lupi female	151	151	1	0
18	32	RIEMLLEENKRLKDE	O. lupi female	0	0	0	0
18	33	IEMLLEENKRLKDEA	O. lupi female	0	0	0	0
18	34	EMLLEENKRLKDEAD	O. lupi female	0	0	0	0
18	35	MLLEENKRLKDEADG	O. lupi female	0	0	0	0
18	36	LLEENKRLKDEADGM	O. lupi female	0	0	0	0
18	37	LEENKRLKDEADGMK	O. lupi female	0	0	0	0
18	38	EENKRLKDEADGMKN	O. lupi female	117	117	1	0
18	39	ENKRLKDEADGMKNR	O. lupi female	0	0	0	0
18	40	NKRLKDEADGMKNRI	O. lupi female	0	0	0	0
18	41	KRLKDEADGMKNRIQ	O. lupi female	0	0	0	0
18	42	RLKDEADGMKNRIQD	O. lupi female	0	0	0	0
18	43	LKDEADGMKNRIQDI	O. lupi female	22.25	18.25	0.820225	0
18	44	KDEADGMKNRIQDIE	O. lupi female	0	0	0	0
18	45	DEADGMKNRIQDIEK	O. lupi female	0	0	0	0
18	46	EADGMKNRIQDIEKE	O. lupi female	0	0	0	0
18	47	ADGMKNRIQDIEKEY	O. lupi female	288.5	288.5	1	0
18	48	DGMKNRIQDIEKEYN	O. lupi female	85	85	1	0
18	49	GMKNRIQDIEKEYNT	O. lupi female	0	0	0	0
18	50	MKNRIQDIEKEYNTI	O. lupi female	52.25	52.25	1	0
18	51	KNRIQDIEKEYNTII	O. lupi female	3.75	3.75	1	0
18	52	NRIQDIEKEYNTIIR	O. lupi female	0	0	0	0
18	53	RIQDIEKEYNTIIRK	O. lupi female	0	0	0	0
18	54	IQDIEKEYNTIIRKL	O. lupi female	0	0	0	0
18	55	QDIEKEYNTIIRKLE	O. lupi female	0	0	0	0
18	56	DIEKEYNTIIRKLEE	O. lupi female	0	0	0	0
18	57	IEKEYNTIIRKLEEK	O. lupi female	0	0	0	0
18	58	EKEYNTIIRKLEEKD	O. lupi female	0	0	0	0
18	59	KEYNTIIRKLEEKDN	O. lupi female	0	0	0	0
18	60	EYNTIIRKLEEKDNA	O. lupi female	0	0	0	0
18	61	YNTIIRKLEEKDNAL	O. lupi female	0	0	0	0
18	62	NTIIRKLEEKDNALK	O. lupi female	7.5	7.5	1	0
18	63	TIIRKLEEKDNALKN	O. lupi female	495	128	0.258586	495
18	64	IIRKLEEKDNALKNL	O. lupi female	0	0	0	0
18	65	IRKLEEKDNALKNLE	O. lupi female	0	0	0	0
18	66	RKLEEKDNALKNLEN	O. lupi female	165.75	73.25	0.441931	0
18	67	KLEEKDNALKNLENI	O. lupi female	95.5	95.5	1	0
20	2	LEEKDNALKNLENIR	O. lupi female	0	0	0	0
20	3	EEKDNALKNLENIRQ	O. lupi female	0	0	0	0
20	4	EKDNALKNLENIRQR	O. lupi female	778.5	127.5	0.163776	778.5
20	5	KDNALKNLENIRQRL	O. lupi female	1549	16	0.0103292	1549
20	6	DNALKNLENIRQRLV	O. lupi female	1125.5	155.5	0.138161	1125.5
20	7	NALKNLENIRQRLVN	O. lupi female	0	0	0	0
20	8	ALKNLENIRQRLVNE	O. lupi female	108	108	1	0
20	9	LKNLENIRQRLVNEL	O. lupi female	18.75	18.75	1	0
20	10	KNLENIRQRLVNELE	O. lupi female	0	0	0	0
20	11	NLENIRQRLVNELEE	O. lupi female	0	0	0	0
20	12	LENIRQRLVNELEEQ	O. lupi female	0	0	0	0
20	13	ENIRQRLVNELEEQR	O. lupi female	149	149	1	0
20	14	NIRQRLVNELEEQRT	O. lupi female	0	0	0	0
20	15	IRQRLVNELEEQRTR	O. lupi female	1226.75	257.25	0.2097	1226.75
20	16	RQRLVNELEEQRTRF	O. lupi female	2007	138	0.0687593	2007
20	17	QRLVNELEEQRTRFD	O. lupi female	2201	162	0.0736029	2201
20	18	RLVNELEEQRTRFDT	O. lupi female	180	52	0.288889	180
20	19	LVNELEEQRTRFDTM	O. lupi female	275.5	29.5	0.107078	275.5
20	20	VNELEEQRTRFDTMT	O. lupi female	25	25	1	0
20	21	NELEEQRTRFDTMTS	O. lupi female	0	0	0	0
20	22	ELEEQRTRFDTMTSE	O. lupi female	1647.25	286.75	0.174078	1647.25
20	23	LEEQRTRFDTMTSEF	O. lupi female	5117.5	444.5	0.0868588	5117.5
20	24	EEQRTRFDTMTSEFD	O. lupi female	152.75	152.75	1	0
20	25	EQRTRFDTMTSEFDN	O. lupi female	971.75	347.25	0.357345	971.75
20	26	QRTRFDTMTSEFDNL	O. lupi female	1770.25	265.25	0.149838	1770.25
20	27	RTRFDTMTSEFDNLR	O. lupi female	1102.25	111.25	0.10093	1102.25
20	28	TRFDTMTSEFDNLRT	O. lupi female	0	0	0	0
20	29	RFDTMTSEFDNLRTN	O. lupi female	218.25	218.25	1	0
20	30	FDTMTSEFDNLRTNY	O. lupi female	1111.75	83.75	0.0753317	1111.75
20	31	DTMTSEFDNLRTNYD	O. lupi female	155.5	106.5	0.684887	0
20	32	TMTSEFDNLRTNYDS	O. lupi female	0	0	0	0
20	33	MTSEFDNLRTNYDSA	O. lupi female	0	0	0	0
20	34	TSEFDNLRTNYDSAN	O. lupi female	317	317	1	0
20	35	SEFDNLRTNYDSANK	O. lupi female	0	0	0	0
20	36	EFDNLRTNYDSANKN	O. lupi female	0	0	0	0
20	37	FDNLRTNYDSANKNT	O. lupi female	0	0	0	0
20	38	DNLRTNYDSANKNTV	O. lupi female	0	0	0	0
20	39	NLRTNYDSANKNTVA	O. lupi female	0	0	0	0
20	40	LRTNYDSANKNTVAI	O. lupi female	0	0	0	0
20	41	RTNYDSANKNTVAIE	O. lupi female	0	0	0	0
20	42	TNYDSANKNTVAIEL	O. lupi female	84	84	1	0
20	43	NYDSANKNTVAIELT	O. lupi female	0	0	0	0
20	44	YDSANKNTVAIELTV	O. lupi female	86.5	86.5	1	0
20	45	DSANKNTVAIELTVK	O. lupi female	0	0	0	0
20	46	SANKNTVAIELTVKE	O. lupi female	0	0	0	0
20	47	ANKNTVAIELTVKEI	O. lupi female	858.75	2.75	0.00320233	858.75
20	48	NKNTVAIELTVKEIK	O. lupi female	10531.8	3766.25	0.357609	10531.8
20	49	KNTVAIELTVKEIKQ	O. lupi female	4098.5	493.5	0.12041	4098.5
20	50	NTVAIELTVKEIKQQ	O. lupi female	97.75	24.75	0.253197	97.75
20	51	TVAIELTVKEIKQQR	O. lupi female	90.75	9.25	0.101928	90.75
20	52	VAIELTVKEIKQQRD	O. lupi female	18	18	1	0
20	53	AIELTVKEIKQQRDE	O. lupi female	0	0	0	0
20	54	IELTVKEIKQQRDEI	O. lupi female	217.75	75.75	0.347876	217.75
20	55	ELTVKEIKQQRDEII	O. lupi female	1421.75	337.75	0.237559	1421.75
20	56	LTVKEIKQQRDEIIK	O. lupi female	0	0	0	0
20	57	TVKEIKQQRDEIIKQ	O. lupi female	48	48	1	0
20	58	VKEIKQQRDEIIKQK	O. lupi female	0	0	0	0
20	59	KEIKQQRDEIIKQKD	O. lupi female	0	0	0	0
20	60	EIKQQRDEIIKQKDK	O. lupi female	0	0	0	0
20	61	IKQQRDEIIKQKDKL	O. lupi female	361	340	0.941828	0
20	62	KQQRDEIIKQKDKLV	O. lupi female	0	0	0	0
20	63	QQRDEIIKQKDKLVK	O. lupi female	0	0	0	0
20	64	QRDEIIKQKDKLVKE	O. lupi female	0	0	0	0
20	65	RDEIIKQKDKLVKEL	O. lupi female	207.5	207.5	1	0
20	66	DEIIKQKDKLVKELA	O. lupi female	0	0	0	0
20	67	EIIKQKDKLVKELAD	O. lupi female	364.25	115.25	0.316404	364.25
22	2	IIKQKDKLVKELADL	O. lupi female	108.5	108.5	1	0
22	3	IKQKDKLVKELADLE	O. lupi female	56.5	56.5	1	0
22	4	KQKDKLVKELADLEN	O. lupi female	0	0	0	0
22	5	QKDKLVKELADLENK	O. lupi female	0	0	0	0
22	6	KDKLVKELADLENKL	O. lupi female	225.5	225.5	1	0
22	7	DKLVKELADLENKLN	O. lupi female	0	0	0	0
22	8	KLVKELADLENKLNN	O. lupi female	0	0	0	0
22	9	LVKELADLENKLNNE	O. lupi female	0	0	0	0
22	10	VKELADLENKLNNET	O. lupi female	155.5	155.5	1	0
22	11	KELADLENKLNNETK	O. lupi female	0	0	0	0
22	12	ELADLENKLNNETKM	O. lupi female	4.75	4.75	1	0
22	13	LADLENKLNNETKMR	O. lupi female	17	17	1	0
22	14	ADLENKLNNETKMRG	O. lupi female	0	0	0	0
22	15	DLENKLNNETKMRGD	O. lupi female	0	0	0	0
22	16	LENKLNNETKMRGDV	O. lupi female	0	0	0	0
22	17	ENKLNNETKMRGDVE	O. lupi female	2.25	2.25	1	0
22	18	NKLNNETKMRGDVEK	O. lupi female	0	0	0	0
22	19	KLNNETKMRGDVEKL	O. lupi female	0	0	0	0
22	20	LNNETKMRGDVEKLN	O. lupi female	0	0	0	0
22	21	NNETKMRGDVEKLNQ	O. lupi female	0	0	0	0
22	22	NETKMRGDVEKLNQR	O. lupi female	1518.5	205.5	0.135331	1518.5
22	23	ETKMRGDVEKLNQRH	O. lupi female	972.75	98.25	0.101002	972.75
22	24	TKMRGDVEKLNQRHL	O. lupi female	800	191	0.23875	800
22	25	KMRGDVEKLNQRHLD	O. lupi female	51.25	9.25	0.180488	51.25
22	26	MRGDVEKLNQRHLDE	O. lupi female	0	0	0	0
22	27	RGDVEKLNQRHLDEI	O. lupi female	0	0	0	0
22	28	GDVEKLNQRHLDEID	O. lupi female	0	0	0	0
22	29	DVEKLNQRHLDEIDN	O. lupi female	156	156	1	0
22	30	VEKLNQRHLDEIDNF	O. lupi female	770	466	0.605195	0
22	31	EKLNQRHLDEIDNFK	O. lupi female	0	0	0	0
22	32	KLNQRHLDEIDNFKK	O. lupi female	0	0	0	0
22	33	LNQRHLDEIDNFKKQ	O. lupi female	0	0	0	0
22	34	NQRHLDEIDNFKKQI	O. lupi female	0	0	0	0
22	35	QRHLDEIDNFKKQIN	O. lupi female	0	0	0	0
22	36	RHLDEIDNFKKQINE	O. lupi female	444.5	342.5	0.770529	0
22	37	HLDEIDNFKKQINEY	O. lupi female	1673	492.5	0.294381	1673
22	38	LDEIDNFKKQINEYI	O. lupi female	887.5	33.5	0.0377465	887.5
22	39	DEIDNFKKQINEYIT	O. lupi female	0	0	0	0
22	40	EIDNFKKQINEYITE	O. lupi female	0	0	0	0
22	41	IDNFKKQINEYITEV	O. lupi female	9	9	1	0
22	42	DNFKKQINEYITEVT	O. lupi female	0	0	0	0
22	43	NFKKQINEYITEVTT	O. lupi female	0	0	0	0
22	44	FKKQINEYITEVTTI	O. lupi female	44	30	0.681818	0
22	45	KKQINEYITEVTTIR	O. lupi female	0	0	0	0
22	46	KQINEYITEVTTIRR	O. lupi female	0	0	0	0
22	47	QINEYITEVTTIRRQ	O. lupi female	0	0	0	0
22	48	INEYITEVTTIRRQN	O. lupi female	0	0	0	0
22	49	NEYITEVTTIRRQND	O. lupi female	0	0	0	0
22	50	EYITEVTTIRRQNDD	O. lupi female	0	0	0	0
22	51	YITEVTTIRRQNDDF	O. lupi female	412.25	23.25	0.0563978	412.25
22	52	ITEVTTIRRQNDDFD	O. lupi female	205.5	205.5	1	0
22	53	TEVTTIRRQNDDFDT	O. lupi female	37.5	37.5	1	0
22	54	EVTTIRRQNDDFDTQ	O. lupi female	215	215	1	0
22	55	VTTIRRQNDDFDTQM	O. lupi female	370.25	168.75	0.455773	0
22	56	TTIRRQNDDFDTQMK	O. lupi female	178.25	94.75	0.531557	0
22	57	TIRRQNDDFDTQMKT	O. lupi female	503	152	0.302187	503
22	58	IRRQNDDFDTQMKTN	O. lupi female	503	79	0.157058	503
22	59	RRQNDDFDTQMKTNQ	O. lupi female	174.25	11.25	0.0645624	174.25
22	60	RQNDDFDTQMKTNQA	O. lupi female	451.5	52.5	0.116279	451.5
22	61	QNDDFDTQMKTNQAK	O. lupi female	24.5	24.5	1	0
22	62	NDDFDTQMKTNQAKL	O. lupi female	557.5	84.5	0.15157	557.5
22	63	DDFDTQMKTNQAKLS	O. lupi female	19	19	1	0
22	64	DFDTQMKTNQAKLSS	O. lupi female	25.5	25.5	1	0
22	65	FDTQMKTNQAKLSSM	O. lupi female	0	0	0	0
22	66	DTQMKTNQAKLSSME	O. lupi female	0	0	0	0
22	67	TQMKTNQAKLSSMEN	O. lupi female	0	0	0	0
24	2	QMKTNQAKLSSMENS	O. lupi female	0	0	0	0
24	3	MKTNQAKLSSMENSL	O. lupi female	177	143	0.80791	0
24	4	KTNQAKLSSMENSLI	O. lupi female	0	0	0	0
24	5	TNQAKLSSMENSLIA	O. lupi female	21	21	1	0
24	6	NQAKLSSMENSLIAA	O. lupi female	0	0	0	0
24	7	QAKLSSMENSLIAAK	O. lupi female	0	0	0	0
24	8	AKLSSMENSLIAAKK	O. lupi female	0	0	0	0
24	9	KLSSMENSLIAAKKE	O. lupi female	161.5	161.5	1	0
24	10	LSSMENSLIAAKKEI	O. lupi female	0	0	0	0
24	11	SSMENSLIAAKKEIE	O. lupi female	0	0	0	0
24	12	SMENSLIAAKKEIEK	O. lupi female	139.5	139.5	1	0
24	13	MENSLIAAKKEIEKL	O. lupi female	0	0	0	0
24	14	ENSLIAAKKEIEKLS	O. lupi female	50.25	50.25	1	0
24	15	NSLIAAKKEIEKLSE	O. lupi female	0	0	0	0
24	16	SLIAAKKEIEKLSEM	O. lupi female	0	0	0	0
24	17	LIAAKKEIEKLSEMN	O. lupi female	0	0	0	0
24	18	IAAKKEIEKLSEMNN	O. lupi female	0	0	0	0
24	19	AAKKEIEKLSEMNNR	O. lupi female	63.75	62.75	0.984314	0
24	20	AKKEIEKLSEMNNRL	O. lupi female	75.25	60.75	0.807309	0
24	21	KKEIEKLSEMNNRLQ	O. lupi female	0	0	0	0
24	22	KEIEKLSEMNNRLQQ	O. lupi female	21	21	1	0
24	23	EIEKLSEMNNRLQQD	O. lupi female	0	0	0	0
24	24	IEKLSEMNNRLQQDK	O. lupi female	0	0	0	0
24	25	EKLSEMNNRLQQDKN	O. lupi female	0	0	0	0
24	26	KLSEMNNRLQQDKND	O. lupi female	0	0	0	0
24	27	LSEMNNRLQQDKNDL	O. lupi female	162.25	162.25	1	0
24	28	SEMNNRLQQDKNDLI	O. lupi female	152.25	152.25	1	0
24	29	EMNNRLQQDKNDLIG	O. lupi female	325	161	0.495385	0
24	30	MNNRLQQDKNDLIGA	O. lupi female	0	0	0	0
24	31	NNRLQQDKNDLIGAK	O. lupi female	0	0	0	0
24	32	NRLQQDKNDLIGAKQ	O. lupi female	0	0	0	0
24	33	RLQQDKNDLIGAKQK	O. lupi female	0	0	0	0
24	34	LQQDKNDLIGAKQKG	O. lupi female	0	0	0	0
24	35	QQDKNDLIGAKQKGD	O. lupi female	0	0	0	0
24	36	QDKNDLIGAKQKGDT	O. lupi female	0	0	0	0
24	37	DKNDLIGAKQKGDTE	O. lupi female	0	0	0	0
24	38	KNDLIGAKQKGDTEL	O. lupi female	0	0	0	0
24	39	NDLIGAKQKGDTELN	O. lupi female	802	88	0.109726	802
24	40	DLIGAKQKGDTELNL	O. lupi female	279	172	0.616487	0
24	41	LIGAKQKGDTELNLL	O. lupi female	2	2	1	0
24	42	IGAKQKGDTELNLLN	O. lupi female	0	0	0	0
24	43	GAKQKGDTELNLLNE	O. lupi female	0	0	0	0
24	44	AKQKGDTELNLLNEK	O. lupi female	0	0	0	0
24	45	KQKGDTELNLLNEKI	O. lupi female	0	0	0	0
24	46	QKGDTELNLLNEKIR	O. lupi female	0	0	0	0
24	47	KGDTELNLLNEKIRK	O. lupi female	274.5	274.5	1	0
24	48	GDTELNLLNEKIRKV	O. lupi female	0	0	0	0
24	49	DTELNLLNEKIRKVE	O. lupi female	118.75	118.75	1	0
24	50	TELNLLNEKIRKVEL	O. lupi female	124.5	124.5	1	0
24	51	ELNLLNEKIRKVELE	O. lupi female	821.25	459.25	0.559209	0
24	52	LNLLNEKIRKVELEF	O. lupi female	921.5	107.5	0.116658	921.5
24	53	NLLNEKIRKVELEFE	O. lupi female	0	0	0	0
24	54	LLNEKIRKVELEFER	O. lupi female	642	2	0.00311526	642
24	55	LNEKIRKVELEFERI	O. lupi female	381.25	64.75	0.169836	381.25
24	56	NEKIRKVELEFERIK	O. lupi female	0	0	0	0
24	57	EKIRKVELEFERIKK	O. lupi female	0	0	0	0
24	58	KIRKVELEFERIKKD	O. lupi female	130	130	1	0
24	59	IRKVELEFERIKKDN	O. lupi female	78.5	78.5	1	0
24	60	RKVELEFERIKKDNQ	O. lupi female	0	0	0	0
24	61	KVELEFERIKKDNQE	O. lupi female	160.5	160.5	1	0
24	62	VELEFERIKKDNQEL	O. lupi female	130.25	130.25	1	0
24	63	ELEFERIKKDNQELE	O. lupi female	0	0	0	0
24	64	LEFERIKKDNQELED	O. lupi female	333.5	275.5	0.826087	0
24	65	EFERIKKDNQELEDH	O. lupi female	127	127	1	0
24	66	FERIKKDNQELEDHE	O. lupi female	0	0	0	0
24	67	ERIKKDNQELEDHER	O. lupi female	983.25	18.75	0.0190694	983.25
26	2	RIKKDNQELEDHERT	O. lupi female	0	0	0	0
26	3	IKKDNQELEDHERTA	O. lupi female	227	179	0.788546	0
26	4	KKDNQELEDHERTAR	O. lupi female	24.75	24.75	1	0
26	5	KDNQELEDHERTARD	O. lupi female	448	59	0.131696	448
26	6	DNQELEDHERTARDD	O. lupi female	260.5	260.5	1	0
26	7	NQELEDHERTARDDL	O. lupi female	640.25	392.25	0.612651	0
26	8	QELEDHERTARDDLK	O. lupi female	0	0	0	0
26	9	ELEDHERTARDDLKQ	O. lupi female	13.75	13.75	1	0
26	10	LEDHERTARDDLKQE	O. lupi female	0	0	0	0
26	11	EDHERTARDDLKQET	O. lupi female	4.75	4.75	1	0
26	12	DHERTARDDLKQETN	O. lupi female	343.75	82.25	0.239273	343.75
26	13	HERTARDDLKQETNR	O. lupi female	906.25	55.75	0.0615172	906.25
26	14	ERTARDDLKQETNRN	O. lupi female	1411.25	53.75	0.0380868	1411.25
26	15	RTARDDLKQETNRNH	O. lupi female	1300.25	477.25	0.367045	1300.25
26	16	TARDDLKQETNRNHL	O. lupi female	1810.75	123.25	0.0680657	1810.75
26	17	ARDDLKQETNRNHLL	O. lupi female	2265.25	174.75	0.0771438	2265.25
26	18	RDDLKQETNRNHLLT	O. lupi female	249.5	75	0.300601	249.5
26	19	DDLKQETNRNHLLTK	O. lupi female	0	0	0	0
26	20	DLKQETNRNHLLTKE	O. lupi female	385	146	0.379221	385
26	21	LKQETNRNHLLTKEL	O. lupi female	0	0	0	0
26	22	KQETNRNHLLTKELE	O. lupi female	20.5	20.5	1	0
26	23	QETNRNHLLTKELEE	O. lupi female	113.25	113.25	1	0
26	24	ETNRNHLLTKELEEA	O. lupi female	320.25	320.25	1	0
26	25	TNRNHLLTKELEEAR	O. lupi female	0	0	0	0
26	26	NRNHLLTKELEEARA	O. lupi female	0	0	0	0
26	27	RNHLLTKELEEARAD	O. lupi female	0	0	0	0
26	28	NHLLTKELEEARADI	O. lupi female	110	110	1	0
26	29	HLLTKELEEARADIV	O. lupi female	0	0	0	0
26	30	LLTKELEEARADIVA	O. lupi female	0	0	0	0
26	31	LTKELEEARADIVAL	O. lupi female	0	0	0	0
26	32	TKELEEARADIVALN	O. lupi female	0	0	0	0
26	33	KELEEARADIVALND	O. lupi female	0	0	0	0
26	34	ELEEARADIVALNDR	O. lupi female	461	51	0.110629	461
26	35	LEEARADIVALNDRL	O. lupi female	998.5	77.5	0.0776164	998.5
26	36	EEARADIVALNDRLA	O. lupi female	290.25	92.75	0.319552	290.25
26	37	EARADIVALNDRLAK	O. lupi female	0	0	0	0
26	38	ARADIVALNDRLAKM	O. lupi female	0	0	0	0
26	39	RADIVALNDRLAKMD	O. lupi female	0	0	0	0
26	40	ADIVALNDRLAKMDA	O. lupi female	0	0	0	0
26	41	DIVALNDRLAKMDAN	O. lupi female	49.25	6.25	0.126904	49.25
26	42	IVALNDRLAKMDANF	O. lupi female	214.5	11	0.0512821	214.5
26	43	VALNDRLAKMDANFK	O. lupi female	795.25	132.75	0.166929	795.25
26	44	ALNDRLAKMDANFKI	O. lupi female	77.25	77.25	1	0
26	45	LNDRLAKMDANFKIK	O. lupi female	0	0	0	0
26	46	NDRLAKMDANFKIKL	O. lupi female	59.75	59.75	1	0
26	47	DRLAKMDANFKIKLD	O. lupi female	0	0	0	0
26	48	RLAKMDANFKIKLDE	O. lupi female	0	0	0	0
26	49	LAKMDANFKIKLDET	O. lupi female	0	0	0	0
26	50	AKMDANFKIKLDETV	O. lupi female	0	0	0	0
26	51	KMDANFKIKLDETVK	O. lupi female	0	0	0	0
26	52	MDANFKIKLDETVKK	O. lupi female	0	0	0	0
26	53	DANFKIKLDETVKKS	O. lupi female	0	0	0	0
26	54	ANFKIKLDETVKKSS	O. lupi female	0	0	0	0
26	55	NFKIKLDETVKKSSA	O. lupi female	0	0	0	0
26	56	FKIKLDETVKKSSAD	O. lupi female	49	49	1	0
26	57	KIKLDETVKKSSADH	O. lupi female	0	0	0	0
26	58	IKLDETVKKSSADHE	O. lupi female	0	0	0	0
26	59	KLDETVKKSSADHET	O. lupi female	45.25	45.25	1	0
26	60	LDETVKKSSADHETI	O. lupi female	23	23	1	0
26	61	DETVKKSSADHETIK	O. lupi female	0	0	0	0
26	62	ETVKKSSADHETIKS	O. lupi female	0	0	0	0
26	63	TVKKSSADHETIKSR	O. lupi female	0	0	0	0
26	64	VKKSSADHETIKSRD	O. lupi female	46.5	46.5	1	0
26	65	KKSSADHETIKSRDS	O. lupi female	0	0	0	0
26	66	KSSADHETIKSRDSK	O. lupi female	0	0	0	0
26	67	SSADHETIKSRDSKS	O. lupi female	0	0	0	0
28	2	SADHETIKSRDSKSE	O. lupi female	0	0	0	0
28	3	ADHETIKSRDSKSEK	O. lupi female	263.5	263.5	1	0
28	4	DHETIKSRDSKSEKI	O. lupi female	208	208	1	0
28	5	HETIKSRDSKSEKII	O. lupi female	296	296	1	0
28	6	ETIKSRDSKSEKIIV	O. lupi female	0	0	0	0
28	7	TIKSRDSKSEKIIVK	O. lupi female	0	0	0	0
28	8	IKSRDSKSEKIIVKH	O. lupi female	19.5	19.5	1	0
28	9	KSRDSKSEKIIVKHE	O. lupi female	0	0	0	0
28	10	SRDSKSEKIIVKHET	O. lupi female	0	0	0	0
28	11	RDSKSEKIIVKHETE	O. lupi female	0	0	0	0
28	12	DSKSEKIIVKHETEI	O. lupi female	3.75	3.75	1	0
28	13	SKSEKIIVKHETEIY	O. lupi female	476	318	0.668067	0
28	14	KSEKIIVKHETEIYE	O. lupi female	0	0	0	0
28	15	SEKIIVKHETEIYEV	O. lupi female	1198	106	0.0884808	1198
28	16	EKIIVKHETEIYEVN	O. lupi female	479.5	310.5	0.64755	0
28	17	KIIVKHETEIYEVNK	O. lupi female	631	631	1	0
28	18	IIVKHETEIYEVNKY	O. lupi female	1036.75	511.25	0.493128	0
28	19	IVKHETEIYEVNKYK	O. lupi female	321	313	0.975078	0
28	20	VKHETEIYEVNKYKA	O. lupi female	0	0	0	0
28	21	KHETEIYEVNKYKAE	O. lupi female	500.25	418.75	0.837081	0
28	22	HETEIYEVNKYKAEL	O. lupi female	1760.5	572.5	0.325192	1760.5
28	23	ETEIYEVNKYKAELE	O. lupi female	0	0	0	0
28	24	TEIYEVNKYKAELEK	O. lupi female	58	58	1	0
28	25	EIYEVNKYKAELEKL	O. lupi female	0	0	0	0
28	26	IYEVNKYKAELEKLE	O. lupi female	108	108	1	0
28	27	YEVNKYKAELEKLES	O. lupi female	0	0	0	0
28	28	EVNKYKAELEKLESD	O. lupi female	0	0	0	0
28	29	VNKYKAELEKLESDK	O. lupi female	0	0	0	0
28	30	NKYKAELEKLESDKD	O. lupi female	0	0	0	0
28	31	KYKAELEKLESDKDD	O. lupi female	0	0	0	0
28	32	YKAELEKLESDKDDL	O. lupi female	0	0	0	0
28	33	KAELEKLESDKDDLE	O. lupi female	0	0	0	0
28	34	AELEKLESDKDDLEK	O. lupi female	0	0	0	0
28	35	ELEKLESDKDDLEKR	O. lupi female	0	0	0	0
28	36	LEKLESDKDDLEKRI	O. lupi female	0	0	0	0
28	37	EKLESDKDDLEKRII	O. lupi female	0	0	0	0
28	38	KLESDKDDLEKRIIG	O. lupi female	44.25	44.25	1	0
28	39	LESDKDDLEKRIIGL	O. lupi female	109	19	0.174312	109
28	40	ESDKDDLEKRIIGLQ	O. lupi female	779	779	1	0
28	41	SDKDDLEKRIIGLQD	O. lupi female	0	0	0	0
28	42	DKDDLEKRIIGLQDE	O. lupi female	0	0	0	0
28	43	KDDLEKRIIGLQDEL	O. lupi female	779.25	543.75	0.697786	0
28	44	DDLEKRIIGLQDELN	O. lupi female	0	0	0	0
28	45	DLEKRIIGLQDELNE	O. lupi female	0	0	0	0
28	46	LEKRIIGLQDELNEK	O. lupi female	0	0	0	0
28	47	EKRIIGLQDELNEKD	O. lupi female	0	0	0	0
28	48	KRIIGLQDELNEKDR	O. lupi female	0	0	0	0
28	49	RIIGLQDELNEKDRD	O. lupi female	0	0	0	0
28	50	IIGLQDELNEKDRDN	O. lupi female	19	19	1	0
28	51	IGLQDELNEKDRDND	O. lupi female	0	0	0	0
28	52	GLQDELNEKDRDNDR	O. lupi female	70.5	70.5	1	0
28	53	LQDELNEKDRDNDRL	O. lupi female	336.75	6.75	0.0200445	336.75
28	54	QDELNEKDRDNDRLN	O. lupi female	502	502	1	0
28	55	DELNEKDRDNDRLNA	O. lupi female	790.75	790.75	1	0
28	56	ELNEKDRDNDRLNAE	O. lupi female	0	0	0	0
28	57	LNEKDRDNDRLNAEI	O. lupi female	0	0	0	0
28	58	NEKDRDNDRLNAEID	O. lupi female	0	0	0	0
28	59	EKDRDNDRLNAEIDD	O. lupi female	111.75	111.75	1	0
28	60	KDRDNDRLNAEIDDL	O. lupi female	0	0	0	0
28	61	DRDNDRLNAEIDDLK	O. lupi female	407.5	157.5	0.386503	407.5
28	62	RDNDRLNAEIDDLKR	O. lupi female	63	63	1	0
28	63	DNDRLNAEIDDLKRK	O. lupi female	119	119	1	0
28	64	NDRLNAEIDDLKRKL	O. lupi female	155.75	144.25	0.926164	0
28	65	DRLNAEIDDLKRKLQ	O. lupi female	0	0	0	0
28	66	RLNAEIDDLKRKLQT	O. lupi female	0	0	0	0
28	67	LNAEIDDLKRKLQTE	O. lupi female	276	276	1	0
30	2	NAEIDDLKRKLQTEI	O. lupi female	0	0	0	0
30	3	AEIDDLKRKLQTEIE	O. lupi female	122.5	122.5	1	0
30	4	EIDDLKRKLQTEIEK	O. lupi female	0	0	0	0
30	5	IDDLKRKLQTEIEKV	O. lupi female	40	40	1	0
30	6	DDLKRKLQTEIEKVR	O. lupi female	40.5	40.5	1	0
30	7	DLKRKLQTEIEKVRK	O. lupi female	0	0	0	0
30	8	LKRKLQTEIEKVRKE	O. lupi female	0	0	0	0
30	9	KRKLQTEIEKVRKET	O. lupi female	0	0	0	0
30	10	RKLQTEIEKVRKETT	O. lupi female	0	0	0	0
30	11	KLQTEIEKVRKETTT	O. lupi female	0	0	0	0
30	12	LQTEIEKVRKETTTV	O. lupi female	105	105	1	0
30	13	QTEIEKVRKETTTVQ	O. lupi female	0	0	0	0
30	14	TEIEKVRKETTTVQE	O. lupi female	0	0	0	0
30	15	EIEKVRKETTTVQER	O. lupi female	0	0	0	0
30	16	IEKVRKETTTVQERY	O. lupi female	926.25	105.25	0.11363	926.25
30	17	EKVRKETTTVQERYH	O. lupi female	849	126	0.14841	849
30	18	KVRKETTTVQERYHI	O. lupi female	438	85	0.194064	438
30	19	VRKETTTVQERYHIE	O. lupi female	53.5	53.5	1	0
30	20	RKETTTVQERYHIEL	O. lupi female	153.25	37.75	0.24633	153.25
30	21	KETTTVQERYHIELD	O. lupi female	34.5	34.5	1	0
30	22	ETTTVQERYHIELDE	O. lupi female	666	666	1	0
30	23	TTTVQERYHIELDEE	O. lupi female	0	0	0	0
30	24	TTVQERYHIELDEER	O. lupi female	22	22	1	0
30	25	TVQERYHIELDEERD	O. lupi female	0	0	0	0
30	26	VQERYHIELDEERDN	O. lupi female	331.25	1.25	0.00377358	331.25
30	27	QERYHIELDEERDNH	O. lupi female	280.5	38.5	0.137255	280.5
30	28	ERYHIELDEERDNHQ	O. lupi female	1337.5	67.5	0.0504673	1337.5
30	29	RYHIELDEERDNHQK	O. lupi female	0	0	0	0
30	30	YHIELDEERDNHQKK	O. lupi female	227.5	227.5	1	0
30	31	HIELDEERDNHQKKI	O. lupi female	0	0	0	0
30	32	IELDEERDNHQKKID	O. lupi female	0	0	0	0
30	33	ELDEERDNHQKKIDS	O. lupi female	0	0	0	0
30	34	LDEERDNHQKKIDSM	O. lupi female	103.5	103.5	1	0
30	35	DEERDNHQKKIDSMN	O. lupi female	176	82	0.465909	0
30	36	EERDNHQKKIDSMNA	O. lupi female	287.5	40.5	0.14087	287.5
30	37	ERDNHQKKIDSMNAL	O. lupi female	443.5	64.5	0.145434	443.5
30	38	RDNHQKKIDSMNALI	O. lupi female	380.75	46.25	0.121471	380.75
30	39	DNHQKKIDSMNALIE	O. lupi female	166	79	0.475904	0
30	40	NHQKKIDSMNALIEE	O. lupi female	85	9.5	0.111765	85
30	41	HQKKIDSMNALIEEL	O. lupi female	24.5	24.5	1	0
30	42	QKKIDSMNALIEELR	O. lupi female	0	0	0	0
30	43	KKIDSMNALIEELRA	O. lupi female	0	0	0	0
30	44	KIDSMNALIEELRAK	O. lupi female	13.75	13.75	1	0
30	45	IDSMNALIEELRAKL	O. lupi female	557.5	276.5	0.495964	0
30	46	DSMNALIEELRAKLS	O. lupi female	0	0	0	0
30	47	SMNALIEELRAKLSD	O. lupi female	71.75	69.75	0.972125	0
30	48	MNALIEELRAKLSDA	O. lupi female	0	0	0	0
30	49	NALIEELRAKLSDAE	O. lupi female	0	0	0	0
30	50	ALIEELRAKLSDAER	O. lupi female	0	0	0	0
30	51	LIEELRAKLSDAERA	O. lupi female	0	0	0	0
30	52	IEELRAKLSDAERAM	O. lupi female	0	0	0	0
30	53	EELRAKLSDAERAMA	O. lupi female	0	0	0	0
30	54	ELRAKLSDAERAMAD	O. lupi female	121.25	121.25	1	0
30	55	LRAKLSDAERAMADL	O. lupi female	110.25	110.25	1	0
30	56	RAKLSDAERAMADLQ	O. lupi female	103	103	1	0
30	57	AKLSDAERAMADLQN	O. lupi female	151.25	74.75	0.494215	0
30	58	KLSDAERAMADLQNR	O. lupi female	186.5	186.5	1	0
30	59	LSDAERAMADLQNRD	O. lupi female	10	10	1	0
30	60	SDAERAMADLQNRDS	O. lupi female	200	10	0.05	200
30	61	DAERAMADLQNRDSI	O. lupi female	424.5	59.5	0.140165	424.5
30	62	AERAMADLQNRDSIL	O. lupi female	421.5	12.5	0.029656	421.5
30	63	ERAMADLQNRDSILE	O. lupi female	259.25	259.25	1	0
30	64	RAMADLQNRDSILER	O. lupi female	362.5	143.5	0.395862	362.5
30	65	AMADLQNRDSILERE	O. lupi female	0	0	0	0
30	66	MADLQNRDSILEREN	O. lupi female	204.75	204.75	1	0
30	67	ADLQNRDSILERENT	O. lupi female	156.5	156.5	1	0
32	2	DLQNRDSILERENTD	O. lupi female	391	93	0.237852	391
32	3	LQNRDSILERENTDW	O. lupi female	1566.5	77.5	0.0494733	1566.5
32	4	QNRDSILERENTDWK	O. lupi female	0	0	0	0
32	5	NRDSILERENTDWKE	O. lupi female	53	53	1	0
32	6	RDSILERENTDWKEK	O. lupi female	0	0	0	0
32	7	DSILERENTDWKEKS	O. lupi female	48.25	48.25	1	0
32	8	SILERENTDWKEKSD	O. lupi female	0	0	0	0
32	9	ILERENTDWKEKSDA	O. lupi female	47.5	47.5	1	0
32	10	LERENTDWKEKSDAL	O. lupi female	0	0	0	0
32	11	ERENTDWKEKSDALN	O. lupi female	0	0	0	0
32	12	RENTDWKEKSDALNM	O. lupi female	407.25	342.75	0.841621	0
32	13	ENTDWKEKSDALNME	O. lupi female	97.25	97.25	1	0
32	14	NTDWKEKSDALNMEL	O. lupi female	113.25	113.25	1	0
32	15	TDWKEKSDALNMELD	O. lupi female	301.5	301.5	1	0
32	16	DWKEKSDALNMELDR	O. lupi female	769.5	406	0.527615	0
32	17	WKEKSDALNMELDRL	O. lupi female	691.75	97.75	0.141308	691.75
32	18	KEKSDALNMELDRLR	O. lupi female	270.5	169.5	0.626617	0
32	19	EKSDALNMELDRLRD	O. lupi female	0	0	0	0
32	20	KSDALNMELDRLRDE	O. lupi female	44.5	44.5	1	0
32	21	SDALNMELDRLRDEL	O. lupi female	700	108	0.154286	700
32	22	DALNMELDRLRDELL	O. lupi female	1062	147	0.138418	1062
32	23	ALNMELDRLRDELLS	O. lupi female	638	140	0.219436	638
32	24	LNMELDRLRDELLSV	O. lupi female	611	40	0.0654664	611
32	25	NMELDRLRDELLSVR	O. lupi female	1435.25	396.75	0.276433	1435.25
32	26	MELDRLRDELLSVRR	O. lupi female	512	82	0.160156	512
32	27	ELDRLRDELLSVRRD	O. lupi female	19.5	19.5	1	0
32	28	LDRLRDELLSVRRDA	O. lupi female	0	0	0	0
32	29	DRLRDELLSVRRDAE	O. lupi female	0	0	0	0
32	30	RLRDELLSVRRDAEK	O. lupi female	111.5	111.5	1	0
32	31	LRDELLSVRRDAEKE	O. lupi female	9100.5	1651.5	0.181474	9100.5
32	32	RDELLSVRRDAEKEI	O. lupi female	1564	299	0.191176	1564
32	33	DELLSVRRDAEKEIN	O. lupi female	44	44	1	0
32	34	ELLSVRRDAEKEINR	O. lupi female	528	3	0.00568182	528
32	35	LLSVRRDAEKEINRY	O. lupi female	1914.5	131.5	0.0686863	1914.5
32	36	LSVRRDAEKEINRYN	O. lupi female	259	6	0.023166	259
32	37	SVRRDAEKEINRYNT	O. lupi female	0	0	0	0
32	38	VRRDAEKEINRYNTD	O. lupi female	0	0	0	0
32	39	RRDAEKEINRYNTDL	O. lupi female	90.25	15.25	0.168975	90.25
32	40	RDAEKEINRYNTDLQ	O. lupi female	0	0	0	0
32	41	DAEKEINRYNTDLQT	O. lupi female	179.5	179.5	1	0
32	42	AEKEINRYNTDLQTA	O. lupi female	235	5	0.0212766	235
32	43	EKEINRYNTDLQTAR	O. lupi female	29	29	1	0
32	44	KEINRYNTDLQTARN	O. lupi female	0	0	0	0
32	45	EINRYNTDLQTARNE	O. lupi female	168	168	1	0
32	46	INRYNTDLQTARNEI	O. lupi female	0	0	0	0
32	47	NRYNTDLQTARNEIK	O. lupi female	0	0	0	0
32	48	RYNTDLQTARNEIKL	O. lupi female	151.25	151.25	1	0
32	49	YNTDLQTARNEIKLL	O. lupi female	0	0	0	0
32	50	NTDLQTARNEIKLLT	O. lupi female	0	0	0	0
32	51	TDLQTARNEIKLLTS	O. lupi female	0	0	0	0
32	52	DLQTARNEIKLLTST	O. lupi female	0	0	0	0
32	53	LQTARNEIKLLTSTN	O. lupi female	0	0	0	0
32	54	QTARNEIKLLTSTNN	O. lupi female	0	0	0	0
32	55	TARNEIKLLTSTNNE	O. lupi female	0	0	0	0
32	56	ARNEIKLLTSTNNEM	O. lupi female	0	0	0	0
32	57	RNEIKLLTSTNNEMK	O. lupi female	41.75	41.75	1	0
32	58	NEIKLLTSTNNEMKS	O. lupi female	0	0	0	0
32	59	EIKLLTSTNNEMKSQ	O. lupi female	0	0	0	0
32	60	IKLLTSTNNEMKSQL	O. lupi female	0	0	0	0
32	61	KLLTSTNNEMKSQLN	O. lupi female	0	0	0	0
32	62	LLTSTNNEMKSQLNV	O. lupi female	261.5	261.5	1	0
32	63	LTSTNNEMKSQLNVA	O. lupi female	0	0	0	0
32	64	TSTNNEMKSQLNVAE	O. lupi female	0	0	0	0
32	65	STNNEMKSQLNVAED	O. lupi female	0	0	0	0
32	66	TNNEMKSQLNVAEDK	O. lupi female	0	0	0	0
32	67	NNEMKSQLNVAEDKI	O. lupi female	0	0	0	0
34	2	NEMKSQLNVAEDKIN	O. lupi female	0	0	0	0
34	3	EMKSQLNVAEDKINS	O. lupi female	562.25	119.25	0.212094	562.25
34	4	MKSQLNVAEDKINSL	O. lupi female	340	65	0.191176	340
34	5	KSQLNVAEDKINSLN	O. lupi female	0	0	0	0
34	6	SQLNVAEDKINSLNK	O. lupi female	329.5	235.5	0.714719	0
34	7	QLNVAEDKINSLNKV	O. lupi female	88.75	88.75	1	0
34	8	LNVAEDKINSLNKVI	O. lupi female	7.5	7.5	1	0
34	9	NVAEDKINSLNKVIT	O. lupi female	209.25	209.25	1	0
34	10	VAEDKINSLNKVITD	O. lupi female	0	0	0	0
34	11	AEDKINSLNKVITDQ	O. lupi female	0	0	0	0
34	12	EDKINSLNKVITDQQ	O. lupi female	847.25	432.25	0.51018	0
34	13	DKINSLNKVITDQQN	O. lupi female	0	0	0	0
34	14	KINSLNKVITDQQNK	O. lupi female	0	0	0	0
34	15	INSLNKVITDQQNKI	O. lupi female	0	0	0	0
34	16	NSLNKVITDQQNKIR	O. lupi female	0	0	0	0
34	17	SLNKVITDQQNKIRD	O. lupi female	0	0	0	0
34	18	LNKVITDQQNKIRDL	O. lupi female	54.5	54.5	1	0
34	19	NKVITDQQNKIRDLT	O. lupi female	0	0	0	0
34	20	KVITDQQNKIRDLTG	O. lupi female	146	146	1	0
34	21	VITDQQNKIRDLTGE	O. lupi female	0	0	0	0
34	22	ITDQQNKIRDLTGEI	O. lupi female	0	0	0	0
34	23	TDQQNKIRDLTGEIR	O. lupi female	358	358	1	0
34	24	DQQNKIRDLTGEIRH	O. lupi female	276	215	0.778986	0
34	25	QQNKIRDLTGEIRHL	O. lupi female	0	0	0	0
34	26	QNKIRDLTGEIRHLE	O. lupi female	0	0	0	0
34	27	NKIRDLTGEIRHLEG	O. lupi female	19.75	19.75	1	0
34	28	KIRDLTGEIRHLEGE	O. lupi female	71	71	1	0
34	29	IRDLTGEIRHLEGEL	O. lupi female	753.25	4.25	0.00564222	753.25
34	30	RDLTGEIRHLEGELK	O. lupi female	0	0	0	0
34	31	DLTGEIRHLEGELKD	O. lupi female	0	0	0	0
34	32	LTGEIRHLEGELKDA	O. lupi female	0	0	0	0
34	33	TGEIRHLEGELKDAK	O. lupi female	0	0	0	0
34	34	GEIRHLEGELKDAKG	O. lupi female	0	0	0	0
34	35	EIRHLEGELKDAKGN	O. lupi female	0	0	0	0
34	36	IRHLEGELKDAKGNV	O. lupi female	0	0	0	0
34	37	RHLEGELKDAKGNVA	O. lupi female	211.5	192.5	0.910165	0
34	38	HLEGELKDAKGNVAN	O. lupi female	191	191	1	0
34	39	LEGELKDAKGNVANL	O. lupi female	97.5	97.5	1	0
34	40	EGELKDAKGNVANLE	O. lupi female	0	0	0	0
34	41	GELKDAKGNVANLES	O. lupi female	83	83	1	0
34	42	ELKDAKGNVANLESE	O. lupi female	0	0	0	0
34	43	LKDAKGNVANLESEL	O. lupi female	0	0	0	0
34	44	KDAKGNVANLESELD	O. lupi female	0	0	0	0
34	45	DAKGNVANLESELDT	O. lupi female	23	23	1	0
34	46	AKGNVANLESELDTT	O. lupi female	0	0	0	0
34	47	KGNVANLESELDTTR	O. lupi female	0	0	0	0
34	48	GNVANLESELDTTRE	O. lupi female	0	0	0	0
34	49	NVANLESELDTTRER	O. lupi female	0	0	0	0
34	50	VANLESELDTTRERI	O. lupi female	0	0	0	0
34	51	ANLESELDTTRERIH	O. lupi female	0	0	0	0
34	52	NLESELDTTRERIHL	O. lupi female	243	140	0.576132	0
34	53	LESELDTTRERIHLL	O. lupi female	717.25	7.75	0.0108052	717.25
34	54	ESELDTTRERIHLLG	O. lupi female	0	0	0	0
34	55	SELDTTRERIHLLGE	O. lupi female	0	0	0	0
34	56	ELDTTRERIHLLGEQ	O. lupi female	0	0	0	0
34	57	LDTTRERIHLLGEQN	O. lupi female	0	0	0	0
34	58	DTTRERIHLLGEQNA	O. lupi female	0	0	0	0
34	59	TTRERIHLLGEQNAS	O. lupi female	0	0	0	0
34	60	TRERIHLLGEQNASL	O. lupi female	0	0	0	0
34	61	RERIHLLGEQNASLQ	O. lupi female	0	0	0	0
34	62	ERIHLLGEQNASLQT	O. lupi female	0	0	0	0
34	63	RIHLLGEQNASLQTE	O. lupi female	33.75	33.75	1	0
34	64	IHLLGEQNASLQTEL	O. lupi female	64	64	1	0
34	65	HLLGEQNASLQTELN	O. lupi female	177.25	177.25	1	0
34	66	LLGEQNASLQTELNK	O. lupi female	0	0	0	0
34	67	LGEQNASLQTELNKI	O. lupi female	124	124	1	0
36	2	GEQNASLQTELNKIK	O. lupi female	0	0	0	0
36	3	EQNASLQTELNKIKG	O. lupi female	0	0	0	0
36	4	QNASLQTELNKIKGD	O. lupi female	0	0	0	0
36	5	NASLQTELNKIKGDI	O. lupi female	0	0	0	0
36	6	ASLQTELNKIKGDID	O. lupi female	0	0	0	0
36	7	SLQTELNKIKGDIDS	O. lupi female	35.75	35.75	1	0
36	8	LQTELNKIKGDIDSL	O. lupi female	66.75	53.25	0.797753	0
36	9	QTELNKIKGDIDSLL	O. lupi female	0	0	0	0
36	10	TELNKIKGDIDSLLG	O. lupi female	17.75	17.75	1	0
36	11	ELNKIKGDIDSLLGE	O. lupi female	0	0	0	0
36	12	LNKIKGDIDSLLGEN	O. lupi female	0	0	0	0
36	13	NKIKGDIDSLLGEND	O. lupi female	0	0	0	0
36	14	KIKGDIDSLLGENDM	O. lupi female	0	0	0	0
36	15	IKGDIDSLLGENDML	O. lupi female	0	0	0	0
36	16	KGDIDSLLGENDMLK	O. lupi female	0	0	0	0
36	17	GDIDSLLGENDMLKT	O. lupi female	446.5	446.5	1	0
36	18	DIDSLLGENDMLKTA	O. lupi female	0	0	0	0
36	19	IDSLLGENDMLKTAK	O. lupi female	0	0	0	0
36	20	DSLLGENDMLKTAKE	O. lupi female	0	0	0	0
36	21	SLLGENDMLKTAKES	O. lupi female	0	0	0	0
36	22	LLGENDMLKTAKESN	O. lupi female	0	0	0	0
36	23	LGENDMLKTAKESNE	O. lupi female	0	0	0	0
36	24	GENDMLKTAKESNEA	O. lupi female	0	0	0	0
36	25	ENDMLKTAKESNEAE	O. lupi female	0	0	0	0
36	26	NDMLKTAKESNEAEI	O. lupi female	0	0	0	0
36	27	DMLKTAKESNEAEID	O. lupi female	0	0	0	0
36	28	MLKTAKESNEAEIDR	O. lupi female	350.25	117.25	0.334761	350.25
36	29	LKTAKESNEAEIDRL	O. lupi female	254.25	254.25	1	0
36	30	KTAKESNEAEIDRLK	O. lupi female	0	0	0	0
36	31	TAKESNEAEIDRLKQ	O. lupi female	0	0	0	0
36	32	AKESNEAEIDRLKQK	O. lupi female	60.75	60.75	1	0
36	33	KESNEAEIDRLKQKL	O. lupi female	3.5	3.5	1	0
36	34	ESNEAEIDRLKQKLQ	O. lupi female	0	0	0	0
36	35	SNEAEIDRLKQKLQR	O. lupi female	0	0	0	0
36	36	NEAEIDRLKQKLQRS	O. lupi female	0	0	0	0
36	37	EAEIDRLKQKLQRSI	O. lupi female	0	0	0	0
36	38	AEIDRLKQKLQRSIE	O. lupi female	0	0	0	0
36	39	EIDRLKQKLQRSIEN	O. lupi female	149.5	149.5	1	0
36	40	IDRLKQKLQRSIENA	O. lupi female	33.5	33.5	1	0
36	41	DRLKQKLQRSIENAK	O. lupi female	0	0	0	0
36	42	RLKQKLQRSIENAKK	O. lupi female	102.75	102.75	1	0
36	43	LKQKLQRSIENAKKH	O. lupi female	199.25	199.25	1	0
36	44	KQKLQRSIENAKKHS	O. lupi female	0	0	0	0
36	45	QKLQRSIENAKKHSD	O. lupi female	0	0	0	0
36	46	KLQRSIENAKKHSDA	O. lupi female	0	0	0	0
36	47	LQRSIENAKKHSDAL	O. lupi female	0	0	0	0
36	48	QRSIENAKKHSDALD	O. lupi female	0	0	0	0
36	49	RSIENAKKHSDALDK	O. lupi female	22	22	1	0
36	50	SIENAKKHSDALDKL	O. lupi female	0	0	0	0
36	51	IENAKKHSDALDKLR	O. lupi female	0	0	0	0
36	52	ENAKKHSDALDKLRP	O. lupi female	0	0	0	0
36	53	NAKKHSDALDKLRPE	O. lupi female	0	0	0	0
36	54	AKKHSDALDKLRPEH	O. lupi female	0	0	0	0
36	55	KKHSDALDKLRPEHD	O. lupi female	0	0	0	0
36	56	KHSDALDKLRPEHDR	O. lupi female	0	0	0	0
36	57	HSDALDKLRPEHDRL	O. lupi female	64.5	64.5	1	0
36	58	SDALDKLRPEHDRLQ	O. lupi female	260	260	1	0
36	59	DALDKLRPEHDRLQN	O. lupi female	425.25	425.25	1	0
36	60	ALDKLRPEHDRLQNL	O. lupi female	614	260	0.423453	0
36	61	LDKLRPEHDRLQNLY	O. lupi female	1009.75	105.25	0.104234	1009.75
36	62	DKLRPEHDRLQNLYR	O. lupi female	476	284	0.596639	0
36	63	KLRPEHDRLQNLYRE	O. lupi female	352.75	194.75	0.552091	0
36	64	LRPEHDRLQNLYREK	O. lupi female	806.5	377.5	0.468072	0
36	65	RPEHDRLQNLYREKL	O. lupi female	837.75	135.75	0.162041	837.75
36	66	PEHDRLQNLYREKLK	O. lupi female	83.5	83.5	1	0
36	67	EHDRLQNLYREKLKQ	O. lupi female	14.25	14.25	1	0
38	2	HDRLQNLYREKLKQS	O. lupi female	625.5	625.5	1	0
38	3	DRLQNLYREKLKQSE	O. lupi female	259	259	1	0
38	4	RLQNLYREKLKQSEN	O. lupi female	93	93	1	0
38	5	LQNLYREKLKQSENL	O. lupi female	0	0	0	0
38	6	QNLYREKLKQSENLT	O. lupi female	0	0	0	0
38	7	NLYREKLKQSENLTQ	O. lupi female	0	0	0	0
38	8	LYREKLKQSENLTQA	O. lupi female	29	29	1	0
38	9	YREKLKQSENLTQAI	O. lupi female	0	0	0	0
38	10	REKLKQSENLTQAIQ	O. lupi female	0	0	0	0
38	11	EKLKQSENLTQAIQD	O. lupi female	65.75	65.75	1	0
38	12	KLKQSENLTQAIQDL	O. lupi female	0	0	0	0
38	13	LKQSENLTQAIQDLE	O. lupi female	0	0	0	0
38	14	KQSENLTQAIQDLES	O. lupi female	0	0	0	0
38	15	QSENLTQAIQDLESR	O. lupi female	0	0	0	0
38	16	SENLTQAIQDLESRL	O. lupi female	140.5	140.5	1	0
38	17	ENLTQAIQDLESRLN	O. lupi female	99	93	0.939394	0
38	18	NLTQAIQDLESRLNQ	O. lupi female	0	0	0	0
38	19	LTQAIQDLESRLNQS	O. lupi female	0	0	0	0
38	20	TQAIQDLESRLNQSR	O. lupi female	76.5	76.5	1	0
38	21	QAIQDLESRLNQSRR	O. lupi female	332.5	120.5	0.362406	332.5
38	22	AIQDLESRLNQSRRE	O. lupi female	225.5	225.5	1	0
38	23	IQDLESRLNQSRREL	O. lupi female	307	39.5	0.128664	307
38	24	QDLESRLNQSRRELR	O. lupi female	233.5	10	0.0428266	233.5
38	25	DLESRLNQSRRELRD	O. lupi female	346.5	73.5	0.212121	346.5
38	26	LESRLNQSRRELRDA	O. lupi female	0	0	0	0
38	27	ESRLNQSRRELRDAT	O. lupi female	0	0	0	0
38	28	SRLNQSRRELRDATD	O. lupi female	0	0	0	0
38	29	RLNQSRRELRDATDK	O. lupi female	29	29	1	0
38	30	LNQSRRELRDATDKL	O. lupi female	522.5	145.5	0.278469	522.5
38	31	NQSRRELRDATDKLI	O. lupi female	585	1	0.0017094	585
38	32	QSRRELRDATDKLIA	O. lupi female	0	0	0	0
38	33	SRRELRDATDKLIAS	O. lupi female	0	0	0	0
38	34	RRELRDATDKLIASE	O. lupi female	0	0	0	0
38	35	RELRDATDKLIASEG	O. lupi female	0	0	0	0
38	36	ELRDATDKLIASEGD	O. lupi female	0	0	0	0
38	37	LRDATDKLIASEGDR	O. lupi female	0	0	0	0
38	38	RDATDKLIASEGDRN	O. lupi female	0	0	0	0
38	39	DATDKLIASEGDRNA	O. lupi female	29.5	29.5	1	0
38	40	ATDKLIASEGDRNAL	O. lupi female	59	59	1	0
38	41	TDKLIASEGDRNALR	O. lupi female	81.5	81.5	1	0
38	42	DKLIASEGDRNALRS	O. lupi female	122	122	1	0
38	43	KLIASEGDRNALRSE	O. lupi female	2	2	1	0
38	44	LIASEGDRNALRSEV	O. lupi female	0	0	0	0
38	45	IASEGDRNALRSEVE	O. lupi female	0	0	0	0
38	46	ASEGDRNALRSEVER	O. lupi female	0	0	0	0
38	47	SEGDRNALRSEVERL	O. lupi female	81	81	1	0
38	48	EGDRNALRSEVERLQ	O. lupi female	116.5	116.5	1	0
38	49	GDRNALRSEVERLQH	O. lupi female	108	108	1	0
38	50	DRNALRSEVERLQHE	O. lupi female	0	0	0	0
38	51	RNALRSEVERLQHEV	O. lupi female	0	0	0	0
38	52	NALRSEVERLQHEVQ	O. lupi female	0	0	0	0
38	53	ALRSEVERLQHEVQF	O. lupi female	479	208	0.434238	0
38	54	LRSEVERLQHEVQFM	O. lupi female	169.25	11.25	0.0664697	169.25
38	55	RSEVERLQHEVQFMR	O. lupi female	267	86	0.322097	267
38	56	SEVERLQHEVQFMRE	O. lupi female	100.25	100.25	1	0
38	57	EVERLQHEVQFMREQ	O. lupi female	0	0	0	0
38	58	VERLQHEVQFMREQL	O. lupi female	0	0	0	0
38	59	ERLQHEVQFMREQLL	O. lupi female	925.5	181.5	0.19611	925.5
38	60	RLQHEVQFMREQLLR	O. lupi female	129	64	0.496124	0
38	61	LQHEVQFMREQLLRK	O. lupi female	0	0	0	0
38	62	QHEVQFMREQLLRKT	O. lupi female	0	0	0	0
38	63	HEVQFMREQLLRKTD	O. lupi female	0	0	0	0
38	64	EVQFMREQLLRKTDE	O. lupi female	0	0	0	0
38	65	VQFMREQLLRKTDEY	O. lupi female	222	27	0.121622	222
38	66	QFMREQLLRKTDEYQ	O. lupi female	0	0	0	0
38	67	FMREQLLRKTDEYQA	O. lupi female	74.75	74.75	1	0
40	2	MREQLLRKTDEYQAA	O. lupi female	0	0	0	0
40	3	REQLLRKTDEYQAAL	O. lupi female	19	19	1	0
40	4	EQLLRKTDEYQAALS	O. lupi female	0	0	0	0
40	5	QLLRKTDEYQAALSD	O. lupi female	0	0	0	0
40	6	LLRKTDEYQAALSDL	O. lupi female	145.5	145.5	1	0
40	7	LRKTDEYQAALSDLV	O. lupi female	0	0	0	0
40	8	RKTDEYQAALSDLVN	O. lupi female	93.75	93.75	1	0
40	9	KTDEYQAALSDLVNA	O. lupi female	0	0	0	0
40	10	TDEYQAALSDLVNAH	O. lupi female	569.5	90.5	0.158911	569.5
40	11	DEYQAALSDLVNAHR	O. lupi female	0	0	0	0
40	12	EYQAALSDLVNAHRT	O. lupi female	46	46	1	0
40	13	YQAALSDLVNAHRTA	O. lupi female	0	0	0	0
40	14	QAALSDLVNAHRTAE	O. lupi female	0	0	0	0
40	15	AALSDLVNAHRTAED	O. lupi female	0	0	0	0
40	16	ALSDLVNAHRTAEDG	O. lupi female	0	0	0	0
40	17	LSDLVNAHRTAEDGR	O. lupi female	0	0	0	0
40	18	SDLVNAHRTAEDGRV	O. lupi female	512.5	48.5	0.0946341	512.5
40	19	DLVNAHRTAEDGRVN	O. lupi female	193	0	0	193
40	20	LVNAHRTAEDGRVNA	O. lupi female	0	0	0	0
40	21	VNAHRTAEDGRVNAV	O. lupi female	0	0	0	0
40	22	NAHRTAEDGRVNAVQ	O. lupi female	0	0	0	0
40	23	AHRTAEDGRVNAVQE	O. lupi female	134.5	134.5	1	0
40	24	HRTAEDGRVNAVQEL	O. lupi female	198.5	198.5	1	0
40	25	RTAEDGRVNAVQELE	O. lupi female	59.25	59.25	1	0
40	26	TAEDGRVNAVQELEA	O. lupi female	0	0	0	0
40	27	AEDGRVNAVQELEAR	O. lupi female	332.25	59.75	0.179834	332.25
40	28	EDGRVNAVQELEARK	O. lupi female	831	136	0.163658	831
40	29	DGRVNAVQELEARKY	O. lupi female	335.25	16.25	0.0484713	335.25
40	30	GRVNAVQELEARKYE	O. lupi female	110.5	63.5	0.574661	0
40	31	RVNAVQELEARKYEI	O. lupi female	260.5	21.5	0.0825336	260.5
40	32	VNAVQELEARKYEIN	O. lupi female	96	26	0.270833	96
40	33	NAVQELEARKYEIND	O. lupi female	177.5	42	0.23662	177.5
40	34	AVQELEARKYEINDL	O. lupi female	634	90	0.141956	634
40	35	VQELEARKYEINDLQ	O. lupi female	29	20	0.689655	0
40	36	QELEARKYEINDLQS	O. lupi female	270.25	37.25	0.137835	270.25
40	37	ELEARKYEINDLQSR	O. lupi female	1240.5	308	0.248287	1240.5
40	38	LEARKYEINDLQSRL	O. lupi female	785	105	0.133758	785
40	39	EARKYEINDLQSRLD	O. lupi female	477.5	8.5	0.017801	477.5
40	40	ARKYEINDLQSRLDN	O. lupi female	222	19	0.0855856	222
40	41	RKYEINDLQSRLDNA	O. lupi female	0	0	0	0
40	42	KYEINDLQSRLDNAE	O. lupi female	0	0	0	0
40	43	YEINDLQSRLDNAEQ	O. lupi female	71	71	1	0
40	44	EINDLQSRLDNAEQY	O. lupi female	774.75	323.75	0.417877	0
40	45	INDLQSRLDNAEQYL	O. lupi female	992.5	26.5	0.0267003	992.5
40	46	NDLQSRLDNAEQYLV	O. lupi female	963	62	0.0643821	963
40	47	DLQSRLDNAEQYLVT	O. lupi female	343.25	98.25	0.286235	343.25
40	48	LQSRLDNAEQYLVTL	O. lupi female	735.25	226.75	0.308399	735.25
40	49	QSRLDNAEQYLVTLQ	O. lupi female	0	0	0	0
40	50	SRLDNAEQYLVTLQQ	O. lupi female	0	0	0	0
40	51	RLDNAEQYLVTLQQN	O. lupi female	536.75	74.75	0.139264	536.75
40	52	LDNAEQYLVTLQQNY	O. lupi female	865.25	31.25	0.0361167	865.25
40	53	DNAEQYLVTLQQNYV	O. lupi female	462.75	312.25	0.67477	0
40	54	NAEQYLVTLQQNYVA	O. lupi female	0	0	0	0
40	55	AEQYLVTLQQNYVAV	O. lupi female	242.75	8.25	0.0339856	242.75
40	56	EQYLVTLQQNYVAVE	O. lupi female	0	0	0	0
40	57	QYLVTLQQNYVAVEN	O. lupi female	0	0	0	0
40	58	YLVTLQQNYVAVENE	O. lupi female	0	0	0	0
40	59	LVTLQQNYVAVENER	O. lupi female	0	0	0	0
40	60	VTLQQNYVAVENERD	O. lupi female	0	0	0	0
40	61	TLQQNYVAVENERDM	O. lupi female	0	0	0	0
40	62	LQQNYVAVENERDML	O. lupi female	0	0	0	0
40	63	QQNYVAVENERDMLY	O. lupi female	17	17	1	0
40	64	QNYVAVENERDMLYD	O. lupi female	0	0	0	0
40	65	NYVAVENERDMLYDA	O. lupi female	0	0	0	0
40	66	YVAVENERDMLYDAL	O. lupi female	50.75	50.75	1	0
40	67	VAVENERDMLYDALR	O. lupi female	170	170	1	0
42	2	AVENERDMLYDALRR	O. lupi female	861.25	58.75	0.0682148	861.25
42	3	VENERDMLYDALRRL	O. lupi female	2087.75	413.75	0.19818	2087.75
42	4	ENERDMLYDALRRLH	O. lupi female	1639.25	101.75	0.0620711	1639.25
42	5	NERDMLYDALRRLHS	O. lupi female	0	0	0	0
42	6	ERDMLYDALRRLHSM	O. lupi female	1467.75	67.75	0.0461591	1467.75
42	7	RDMLYDALRRLHSMI	O. lupi female	1198.75	125.75	0.104901	1198.75
42	8	DMLYDALRRLHSMID	O. lupi female	1704.5	139.5	0.0818422	1704.5
42	9	MLYDALRRLHSMIDR	O. lupi female	1149.5	86.5	0.0752501	1149.5
42	10	LYDALRRLHSMIDRT	O. lupi female	0	0	0	0
42	11	YDALRRLHSMIDRTV	O. lupi female	0	0	0	0
42	12	DALRRLHSMIDRTVT	O. lupi female	0	0	0	0
42	13	ALRRLHSMIDRTVTI	O. lupi female	32.5	32.5	1	0
42	14	LRRLHSMIDRTVTIN	O. lupi female	215	146	0.67907	0
42	15	RRLHSMIDRTVTINR	O. lupi female	1023.75	143.75	0.140415	1023.75
42	16	RLHSMIDRTVTINRF	O. lupi female	2275.5	460.5	0.202373	2275.5
42	17	LHSMIDRTVTINRFL	O. lupi female	2805.5	470.5	0.167706	2805.5
42	18	HSMIDRTVTINRFLI	O. lupi female	2457.75	46.75	0.0190215	2457.75
42	19	SMIDRTVTINRFLIG	O. lupi female	162.75	49.25	0.302611	162.75
42	20	MIDRTVTINRFLIGV	O. lupi female	0	0	0	0
42	21	IDRTVTINRFLIGVD	O. lupi female	33.75	33.75	1	0
42	22	DRTVTINRFLIGVDE	O. lupi female	0	0	0	0
42	23	RTVTINRFLIGVDES	O. lupi female	0	0	0	0
42	24	TVTINRFLIGVDESM	O. lupi female	0	0	0	0
42	25	VTINRFLIGVDESME	O. lupi female	0	0	0	0
42	26	TINRFLIGVDESMEE	O. lupi female	0	0	0	0
42	27	INRFLIGVDESMEEK	O. lupi female	0	0	0	0
42	28	NRFLIGVDESMEEKK	O. lupi female	0	0	0	0
42	29	RFLIGVDESMEEKKE	O. lupi female	0	0	0	0
42	30	FLIGVDESMEEKKET	O. lupi female	0	0	0	0
42	31	LIGVDESMEEKKETV	O. lupi female	82	82	1	0
42	32	IGVDESMEEKKETVP	O. lupi female	0	0	0	0
42	33	GVDESMEEKKETVPQ	O. lupi female	0	0	0	0
42	34	VDESMEEKKETVPQT	O. lupi female	0	0	0	0
42	35	DESMEEKKETVPQTQ	O. lupi female	0	0	0	0
42	36	ESMEEKKETVPQTQK	O. lupi female	0	0	0	0
42	37	SMEEKKETVPQTQKS	O. lupi female	0	0	0	0
42	38	MEEKKETVPQTQKSP	O. lupi female	0	0	0	0
42	39	EEKKETVPQTQKSPD	O. lupi female	0	0	0	0
42	40	EKKETVPQTQKSPDG	O. lupi female	0	0	0	0
42	41	KKETVPQTQKSPDGK	O. lupi female	0	0	0	0
42	42	KETVPQTQKSPDGKT	O. lupi female	67	67	1	0
42	43	ETVPQTQKSPDGKTK	O. lupi female	0	0	0	0
42	44	TVPQTQKSPDGKTKE	O. lupi female	0	0	0	0
42	45	VPQTQKSPDGKTKER	O. lupi female	0	0	0	0
42	46	PQTQKSPDGKTKERF	O. lupi female	60	60	1	0
42	47	QTQKSPDGKTKERFD	O. lupi female	0	0	0	0
42	48	TQKSPDGKTKERFDI	O. lupi female	233.5	233.5	1	0
42	49	QKSPDGKTKERFDIS	O. lupi female	0	0	0	0
42	50	KSPDGKTKERFDISD	O. lupi female	0	0	0	0
42	51	SPDGKTKERFDISDL	O. lupi female	0	0	0	0
42	52	PDGKTKERFDISDLD	O. lupi female	0	0	0	0
42	53	DGKTKERFDISDLDT	O. lupi female	0	0	0	0
42	54	GKTKERFDISDLDTN	O. lupi female	0	0	0	0
42	55	KTKERFDISDLDTNI	O. lupi female	84.75	84.75	1	0
42	56	TKERFDISDLDTNIQ	O. lupi female	33.25	33.25	1	0
42	57	KERFDISDLDTNIQK	O. lupi female	0	0	0	0
42	58	ERFDISDLDTNIQKL	O. lupi female	885	175	0.19774	885
42	59	RFDISDLDTNIQKLI	O. lupi female	530.5	353.5	0.666352	0
42	60	FDISDLDTNIQKLIG	O. lupi female	104.75	90.25	0.861575	0
42	61	DISDLDTNIQKLIGR	O. lupi female	22.75	22.75	1	0
42	62	ISDLDTNIQKLIGRI	O. lupi female	16	16	1	0
42	63	SDLDTNIQKLIGRIE	O. lupi female	39.5	39.5	1	0
42	64	DLDTNIQKLIGRIEK	O. lupi female	0	0	0	0
42	65	LDTNIQKLIGRIEKL	O. lupi female	0	0	0	0
42	66	DTNIQKLIGRIEKLE	O. lupi female	42	42	1	0
42	67	TNIQKLIGRIEKLEL	O. lupi female	116.5	116.5	1	0
44	2	NIQKLIGRIEKLELE	O. lupi female	50.75	50.75	1	0
44	3	IQKLIGRIEKLELER	O. lupi female	231.75	231.75	1	0
44	4	QKLIGRIEKLELERN	O. lupi female	0	0	0	0
44	5	KLIGRIEKLELERNE	O. lupi female	665	665	1	0
44	6	LIGRIEKLELERNEY	O. lupi female	0	0	0	0
44	7	IGRIEKLELERNEYR	O. lupi female	435	11	0.0252874	435
44	8	GRIEKLELERNEYRD	O. lupi female	0	0	0	0
44	9	RIEKLELERNEYRDA	O. lupi female	108	108	1	0
44	10	IEKLELERNEYRDAL	O. lupi female	0	0	0	0
44	11	EKLELERNEYRDALD	O. lupi female	0	0	0	0
44	12	KLELERNEYRDALDR	O. lupi female	635	192	0.302362	635
44	13	LELERNEYRDALDRI	O. lupi female	1258.75	110.25	0.0875869	1258.75
44	14	ELERNEYRDALDRIK	O. lupi female	0	0	0	0
44	15	LERNEYRDALDRIKK	O. lupi female	0	0	0	0
44	16	ERNEYRDALDRIKKK	O. lupi female	0	0	0	0
44	17	RNEYRDALDRIKKKS	O. lupi female	0	0	0	0
44	18	NEYRDALDRIKKKSI	O. lupi female	0	0	0	0
44	19	EYRDALDRIKKKSIE	O. lupi female	0	0	0	0
44	20	YRDALDRIKKKSIES	O. lupi female	0	0	0	0
44	21	RDALDRIKKKSIESH	O. lupi female	28.5	28.5	1	0
44	22	DALDRIKKKSIESHI	O. lupi female	0	0	0	0
44	23	ALDRIKKKSIESHIK	O. lupi female	0	0	0	0
44	24	LDRIKKKSIESHIKI	O. lupi female	371.75	281.25	0.756557	0
44	25	DRIKKKSIESHIKIN	O. lupi female	69.5	69.5	1	0
44	26	RIKKKSIESHIKINK	O. lupi female	11.5	11.5	1	0
44	27	IKKKSIESHIKINKQ	O. lupi female	0	0	0	0
44	28	KKKSIESHIKINKQE	O. lupi female	9.5	9.5	1	0
44	29	KKSIESHIKINKQET	O. lupi female	0	0	0	0
44	30	KSIESHIKINKQETI	O. lupi female	397.5	397.5	1	0
44	31	SIESHIKINKQETIF	O. lupi female	394.25	46.25	0.117311	394.25
44	32	IESHIKINKQETIFT	O. lupi female	0	0	0	0
44	33	ESHIKINKQETIFTN	O. lupi female	399.5	229.5	0.574468	0
44	34	SHIKINKQETIFTNI	O. lupi female	0	0	0	0
44	35	HIKINKQETIFTNIE	O. lupi female	0	0	0	0
44	36	IKINKQETIFTNIED	O. lupi female	0	0	0	0
44	37	KINKQETIFTNIEDQ	O. lupi female	0	0	0	0
44	38	INKQETIFTNIEDQL	O. lupi female	0	0	0	0
44	39	NKQETIFTNIEDQLV	O. lupi female	211	58	0.274882	211
44	40	KQETIFTNIEDQLVD	O. lupi female	50.25	50.25	1	0
44	41	QETIFTNIEDQLVDV	O. lupi female	0	0	0	0
44	42	ETIFTNIEDQLVDVE	O. lupi female	0	0	0	0
44	43	TIFTNIEDQLVDVEE	O. lupi female	0	0	0	0
44	44	IFTNIEDQLVDVEEE	O. lupi female	0	0	0	0
44	45	FTNIEDQLVDVEEEK	O. lupi female	19	19	1	0
44	46	TNIEDQLVDVEEEKR	O. lupi female	0	0	0	0
44	47	NIEDQLVDVEEEKRT	O. lupi female	0	0	0	0
44	48	IEDQLVDVEEEKRTL	O. lupi female	0	0	0	0
44	49	EDQLVDVEEEKRTLE	O. lupi female	0	0	0	0
44	50	DQLVDVEEEKRTLEM	O. lupi female	0	0	0	0
44	51	QLVDVEEEKRTLEMR	O. lupi female	13	13	1	0
44	52	LVDVEEEKRTLEMRL	O. lupi female	213.5	112.5	0.526932	0
44	53	VDVEEEKRTLEMRLA	O. lupi female	0	0	0	0
44	54	DVEEEKRTLEMRLAS	O. lupi female	0	0	0	0
44	55	VEEEKRTLEMRLASA	O. lupi female	69.25	69.25	1	0
44	56	EEEKRTLEMRLASAK	O. lupi female	0	0	0	0
44	57	EEKRTLEMRLASAKQ	O. lupi female	0	0	0	0
44	58	EKRTLEMRLASAKQL	O. lupi female	0	0	0	0
44	59	KRTLEMRLASAKQLL	O. lupi female	442.5	442.5	1	0
44	60	RTLEMRLASAKQLLR	O. lupi female	758	758	1	0
44	61	TLEMRLASAKQLLRS	O. lupi female	179.5	179.5	1	0
44	62	LEMRLASAKQLLRSQ	O. lupi female	21.5	21.5	1	0
44	63	EMRLASAKQLLRSQE	O. lupi female	0	0	0	0
44	64	MRLASAKQLLRSQEE	O. lupi female	0	0	0	0
44	65	RLASAKQLLRSQEEA	O. lupi female	0	0	0	0
44	66	LASAKQLLRSQEEAL	O. lupi female	0	0	0	0
44	67	ASAKQLLRSQEEALK	O. lupi female	0	0	0	0
46	2	SAKQLLRSQEEALKQ	O. lupi female	0	0	0	0
46	3	AKQLLRSQEEALKQR	O. lupi female	0	0	0	0
46	4	KQLLRSQEEALKQRD	O. lupi female	28.5	28.5	1	0
46	5	QLLRSQEEALKQRDE	O. lupi female	0	0	0	0
46	6	LLRSQEEALKQRDEE	O. lupi female	123	123	1	0
46	7	LRSQEEALKQRDEER	O. lupi female	94.5	94.5	1	0
46	8	RSQEEALKQRDEERR	O. lupi female	190.75	37.25	0.195282	190.75
46	9	SQEEALKQRDEERRH	O. lupi female	176	176	1	0
46	10	QEEALKQRDEERRHM	O. lupi female	0	0	0	0
46	11	EEALKQRDEERRHMK	O. lupi female	0	0	0	0
46	12	EALKQRDEERRHMKL	O. lupi female	297	16	0.0538721	297
46	13	ALKQRDEERRHMKLK	O. lupi female	41.75	16.75	0.401198	0
46	14	LKQRDEERRHMKLKI	O. lupi female	0	0	0	0
46	15	KQRDEERRHMKLKIA	O. lupi female	0	0	0	0
46	16	QRDEERRHMKLKIAK	O. lupi female	0	0	0	0
46	17	RDEERRHMKLKIAKF	O. lupi female	238	238	1	0
46	18	DEERRHMKLKIAKFE	O. lupi female	132.5	132.5	1	0
46	19	EERRHMKLKIAKFEM	O. lupi female	0	0	0	0
46	20	ERRHMKLKIAKFEME	O. lupi female	0	0	0	0
46	21	RRHMKLKIAKFEMEA	O. lupi female	11.5	11.5	1	0
46	22	RHMKLKIAKFEMEAR	O. lupi female	210	52.5	0.25	210
46	23	HMKLKIAKFEMEARG	O. lupi female	0	0	0	0
46	24	MKLKIAKFEMEARGK	O. lupi female	0	0	0	0
46	25	KLKIAKFEMEARGKE	O. lupi female	0	0	0	0
46	26	LKIAKFEMEARGKEA	O. lupi female	0	0	0	0
46	27	KIAKFEMEARGKEAQ	O. lupi female	49	49	1	0
46	28	IAKFEMEARGKEAQL	O. lupi female	22	22	1	0
46	29	AKFEMEARGKEAQLR	O. lupi female	0	0	0	0
46	30	KFEMEARGKEAQLRQ	O. lupi female	815.75	71.75	0.0879559	815.75
46	31	FEMEARGKEAQLRQL	O. lupi female	688.5	95.5	0.138707	688.5
46	32	EMEARGKEAQLRQLN	O. lupi female	58.75	58.75	1	0
46	33	MEARGKEAQLRQLNE	O. lupi female	0	0	0	0
46	34	EARGKEAQLRQLNEL	O. lupi female	0	0	0	0
46	35	ARGKEAQLRQLNELV	O. lupi female	146	146	1	0
46	36	RGKEAQLRQLNELVR	O. lupi female	196.5	196.5	1	0
46	37	GKEAQLRQLNELVRN	O. lupi female	712	75	0.105337	712
46	38	KEAQLRQLNELVRNL	O. lupi female	243	21.5	0.0884774	243
46	39	EAQLRQLNELVRNLR	O. lupi female	889.5	11.5	0.0129286	889.5
46	40	AQLRQLNELVRNLRK	O. lupi female	0	0	0	0
46	41	QLRQLNELVRNLRKD	O. lupi female	774.5	3.5	0.00451904	774.5
46	42	LRQLNELVRNLRKDL	O. lupi female	189	189	1	0
46	43	RQLNELVRNLRKDLE	O. lupi female	123	123	1	0
46	44	QLNELVRNLRKDLET	O. lupi female	0	0	0	0
46	45	LNELVRNLRKDLETA	O. lupi female	331.5	184.5	0.556561	0
46	46	NELVRNLRKDLETAQ	O. lupi female	186	186	1	0
46	47	ELVRNLRKDLETAQG	O. lupi female	0	0	0	0
46	48	LVRNLRKDLETAQGD	O. lupi female	0	0	0	0
46	49	VRNLRKDLETAQGDL	O. lupi female	0	0	0	0
46	50	RNLRKDLETAQGDLG	O. lupi female	46	46	1	0
46	51	NLRKDLETAQGDLGV	O. lupi female	33.25	33.25	1	0
46	52	LRKDLETAQGDLGVL	O. lupi female	229.5	85.5	0.372549	229.5
46	53	RKDLETAQGDLGVLH	O. lupi female	126.75	54.25	0.428008	0
46	54	KDLETAQGDLGVLHD	O. lupi female	1378	167	0.12119	1378
46	55	DLETAQGDLGVLHDH	O. lupi female	1734.75	133.75	0.0771004	1734.75
46	56	LETAQGDLGVLHDHE	O. lupi female	52.75	52.75	1	0
46	57	ETAQGDLGVLHDHEE	O. lupi female	0	0	0	0
46	58	TAQGDLGVLHDHEER	O. lupi female	606.75	363.25	0.598681	0
46	59	AQGDLGVLHDHEERW	O. lupi female	3670	314	0.0855586	3670
46	60	QGDLGVLHDHEERWY	O. lupi female	3734.25	163.75	0.0438508	3734.25
46	61	GDLGVLHDHEERWYA	O. lupi female	2414.75	68.75	0.0284709	2414.75
46	62	DLGVLHDHEERWYAH	O. lupi female	4570.75	656.25	0.143576	4570.75
46	63	LGVLHDHEERWYAHK	O. lupi female	631.75	143.25	0.226751	631.75
46	64	GVLHDHEERWYAHKF	O. lupi female	2334	92	0.0394173	2334
46	65	VLHDHEERWYAHKFH	O. lupi female	2299.75	216.25	0.094032	2299.75
46	66	LHDHEERWYAHKFHL	O. lupi female	3136	95	0.0302934	3136
46	67	HDHEERWYAHKFHLE	O. lupi female	1491.75	88.75	0.0594939	1491.75
48	2	DHEERWYAHKFHLES	O. lupi female	412.25	330.25	0.801092	0
48	3	HEERWYAHKFHLESK	O. lupi female	331.25	331.25	1	0
48	4	EERWYAHKFHLESKL	O. lupi female	447	447	1	0
48	5	ERWYAHKFHLESKLK	O. lupi female	0	0	0	0
48	6	RWYAHKFHLESKLKD	O. lupi female	0	0	0	0
48	7	WYAHKFHLESKLKDQ	O. lupi female	28.25	28.25	1	0
48	8	YAHKFHLESKLKDQE	O. lupi female	0	0	0	0
48	9	AHKFHLESKLKDQES	O. lupi female	0	0	0	0
48	10	HKFHLESKLKDQESE	O. lupi female	0	0	0	0
48	11	KFHLESKLKDQESES	O. lupi female	0	0	0	0
48	12	FHLESKLKDQESESQ	O. lupi female	0	0	0	0
48	13	HLESKLKDQESESQQ	O. lupi female	0	0	0	0
48	14	LESKLKDQESESQQI	O. lupi female	0	0	0	0
48	15	ESKLKDQESESQQIR	O. lupi female	0	0	0	0
48	16	SKLKDQESESQQIRL	O. lupi female	79.5	79.5	1	0
48	17	KLKDQESESQQIRLL	O. lupi female	0	0	0	0
48	18	LKDQESESQQIRLLL	O. lupi female	0	0	0	0
48	19	KDQESESQQIRLLLA	O. lupi female	0	0	0	0
48	20	DQESESQQIRLLLAN	O. lupi female	0	0	0	0
48	21	QESESQQIRLLLANF	O. lupi female	86.25	16.75	0.194203	86.25
48	22	ESESQQIRLLLANFE	O. lupi female	0	0	0	0
48	23	SESQQIRLLLANFES	O. lupi female	0	0	0	0
48	24	ESQQIRLLLANFESE	O. lupi female	0	0	0	0
48	25	SQQIRLLLANFESER	O. lupi female	309	21	0.0679612	309
48	26	QQIRLLLANFESERN	O. lupi female	116.5	116.5	1	0
48	27	QIRLLLANFESERNS	O. lupi female	0	0	0	0
48	28	IRLLLANFESERNSL	O. lupi female	572.75	96.75	0.168922	572.75
48	29	RLLLANFESERNSLN	O. lupi female	325.5	160.5	0.493088	0
48	30	LLLANFESERNSLNE	O. lupi female	0	0	0	0
48	31	LLANFESERNSLNEK	O. lupi female	51	51	1	0
48	32	LANFESERNSLNEKV	O. lupi female	107.75	107.75	1	0
48	33	ANFESERNSLNEKVR	O. lupi female	0	0	0	0
48	34	NFESERNSLNEKVRD	O. lupi female	0	0	0	0
48	35	FESERNSLNEKVRDL	O. lupi female	0	0	0	0
48	36	ESERNSLNEKVRDLA	O. lupi female	0	0	0	0
48	37	SERNSLNEKVRDLAS	O. lupi female	0	0	0	0
48	38	ERNSLNEKVRDLASR	O. lupi female	0	0	0	0
48	39	RNSLNEKVRDLASRL	O. lupi female	42	42	1	0
48	40	NSLNEKVRDLASRLQ	O. lupi female	86	86	1	0
48	41	SLNEKVRDLASRLQQ	O. lupi female	127.5	127.5	1	0
48	42	LNEKVRDLASRLQQT	O. lupi female	0	0	0	0
48	43	NEKVRDLASRLQQTE	O. lupi female	0	0	0	0
48	44	EKVRDLASRLQQTES	O. lupi female	0	0	0	0
48	45	KVRDLASRLQQTESK	O. lupi female	381.75	381.75	1	0
48	46	VRDLASRLQQTESKN	O. lupi female	4	4	1	0
48	47	RDLASRLQQTESKNA	O. lupi female	0	0	0	0
48	48	DLASRLQQTESKNAD	O. lupi female	0	0	0	0
48	49	LASRLQQTESKNADI	O. lupi female	0	0	0	0
48	50	ASRLQQTESKNADIK	O. lupi female	0	0	0	0
48	51	SRLQQTESKNADIKE	O. lupi female	0	0	0	0
48	52	RLQQTESKNADIKED	O. lupi female	0	0	0	0
48	53	LQQTESKNADIKEDN	O. lupi female	0	0	0	0
48	54	QQTESKNADIKEDND	O. lupi female	0	0	0	0
48	55	QTESKNADIKEDNDR	O. lupi female	128.5	128.5	1	0
48	56	TESKNADIKEDNDRL	O. lupi female	8.5	8.5	1	0
48	57	ESKNADIKEDNDRLK	O. lupi female	0	0	0	0
48	58	SKNADIKEDNDRLKK	O. lupi female	0	0	0	0
48	59	KNADIKEDNDRLKKD	O. lupi female	116.75	116.75	1	0
48	60	NADIKEDNDRLKKDL	O. lupi female	51	51	1	0
48	61	ADIKEDNDRLKKDLI	O. lupi female	492	205	0.416667	0
48	62	DIKEDNDRLKKDLIK	O. lupi female	0	0	0	0
48	63	IKEDNDRLKKDLIKA	O. lupi female	234	234	1	0
48	64	KEDNDRLKKDLIKAS	O. lupi female	400	400	1	0
48	65	EDNDRLKKDLIKAST	O. lupi female	0	0	0	0
48	66	DNDRLKKDLIKASTN	O. lupi female	0	0	0	0
48	67	NDRLKKDLIKASTNE	O. lupi female	0	0	0	0
50	2	DRLKKDLIKASTNEA	O. lupi female	0	0	0	0
50	3	RLKKDLIKASTNEAE	O. lupi female	0	0	0	0
50	4	LKKDLIKASTNEAEL	O. lupi female	0	0	0	0
50	5	KKDLIKASTNEAELR	O. lupi female	0	0	0	0
50	6	KDLIKASTNEAELRR	O. lupi female	0	0	0	0
50	7	DLIKASTNEAELRRT	O. lupi female	0	0	0	0
50	8	LIKASTNEAELRRTI	O. lupi female	0	0	0	0
50	9	IKASTNEAELRRTID	O. lupi female	0	0	0	0
50	10	KASTNEAELRRTIDQ	O. lupi female	34	34	1	0
50	11	ASTNEAELRRTIDQS	O. lupi female	0	0	0	0
50	12	STNEAELRRTIDQSS	O. lupi female	0	0	0	0
50	13	TNEAELRRTIDQSSR	O. lupi female	0	0	0	0
50	14	NEAELRRTIDQSSRV	O. lupi female	9.5	9.5	1	0
50	15	EAELRRTIDQSSRVI	O. lupi female	0	0	0	0
50	16	AELRRTIDQSSRVIS	O. lupi female	0	0	0	0
50	17	ELRRTIDQSSRVISD	O. lupi female	0	0	0	0
50	18	LRRTIDQSSRVISDN	O. lupi female	0	0	0	0
50	19	RRTIDQSSRVISDNQ	O. lupi female	0	0	0	0
50	20	RTIDQSSRVISDNQI	O. lupi female	0	0	0	0
50	21	TIDQSSRVISDNQIL	O. lupi female	346	144	0.416185	0
50	22	IDQSSRVISDNQILK	O. lupi female	505	505	1	0
50	23	DQSSRVISDNQILKD	O. lupi female	0	0	0	0
50	24	QSSRVISDNQILKDQ	O. lupi female	0	0	0	0
50	25	SSRVISDNQILKDQL	O. lupi female	0	0	0	0
50	26	SRVISDNQILKDQLE	O. lupi female	0	0	0	0
50	27	RVISDNQILKDQLES	O. lupi female	0	0	0	0
50	28	VISDNQILKDQLESA	O. lupi female	0	0	0	0
50	29	ISDNQILKDQLESAQ	O. lupi female	843	14	0.0166074	843
50	30	SDNQILKDQLESAQN	O. lupi female	2563.5	1561.5	0.609128	2563.5
50	31	DNQILKDQLESAQND	O. lupi female	831	3	0.00361011	831
50	32	NQILKDQLESAQNDL	O. lupi female	1122.75	454.75	0.405032	1122.75
50	33	QILKDQLESAQNDLS	O. lupi female	0	0	0	0
50	34	ILKDQLESAQNDLSN	O. lupi female	2.75	2.75	1	0
50	35	LKDQLESAQNDLSNA	O. lupi female	3	3	1	0
50	36	KDQLESAQNDLSNAN	O. lupi female	61.5	4.5	0.0731707	61.5
50	37	DQLESAQNDLSNANN	O. lupi female	51.5	51.5	1	0
50	38	QLESAQNDLSNANNR	O. lupi female	78.5	78.5	1	0
50	39	LESAQNDLSNANNRK	O. lupi female	0	0	0	0
50	40	ESAQNDLSNANNRKQ	O. lupi female	177.5	177.5	1	0
50	41	SAQNDLSNANNRKQQ	O. lupi female	0	0	0	0
50	42	AQNDLSNANNRKQQL	O. lupi female	0	0	0	0
50	43	QNDLSNANNRKQQLE	O. lupi female	0	0	0	0
50	44	NDLSNANNRKQQLEN	O. lupi female	62	62	1	0
50	45	DLSNANNRKQQLENE	O. lupi female	0	0	0	0
50	46	LSNANNRKQQLENEL	O. lupi female	0	0	0	0
50	47	SNANNRKQQLENELL	O. lupi female	53.25	53.25	1	0
50	48	NANNRKQQLENELLV	O. lupi female	0	0	0	0
50	49	ANNRKQQLENELLVV	O. lupi female	89	89	1	0
50	50	NNRKQQLENELLVVR	O. lupi female	278.75	89.25	0.320179	278.75
50	51	NRKQQLENELLVVRS	O. lupi female	0	0	0	0
50	52	RKQQLENELLVVRSE	O. lupi female	0	0	0	0
50	53	KQQLENELLVVRSEL	O. lupi female	94.5	94.5	1	0
50	54	QQLENELLVVRSELR	O. lupi female	100.5	100.5	1	0
50	55	QLENELLVVRSELRD	O. lupi female	0	0	0	0
50	56	LENELLVVRSELRDL	O. lupi female	198.75	22.75	0.114465	198.75
50	57	ENELLVVRSELRDLK	O. lupi female	0	0	0	0
50	58	NELLVVRSELRDLKQ	O. lupi female	441.5	311.5	0.705549	0
50	59	ELLVVRSELRDLKQR	O. lupi female	987.25	45.25	0.0458344	987.25
50	60	LLVVRSELRDLKQRF	O. lupi female	642.25	259.75	0.404438	0
50	61	LVVRSELRDLKQRFS	O. lupi female	0	0	0	0
50	62	VVRSELRDLKQRFSD	O. lupi female	236	236	1	0
50	63	VRSELRDLKQRFSDN	O. lupi female	88.5	88.5	1	0
50	64	RSELRDLKQRFSDNA	O. lupi female	0	0	0	0
50	65	SELRDLKQRFSDNAN	O. lupi female	146.5	146.5	1	0
50	66	ELRDLKQRFSDNANR	O. lupi female	96.5	96.5	1	0
50	67	LRDLKQRFSDNANRI	O. lupi female	0	0	0	0
52	2	RDLKQRFSDNANRIM	O. lupi female	19.75	13.75	0.696203	0
52	3	DLKQRFSDNANRIMD	O. lupi female	456.75	397.75	0.870826	0
52	4	LKQRFSDNANRIMDL	O. lupi female	0	0	0	0
52	5	KQRFSDNANRIMDLQ	O. lupi female	355.5	101.5	0.285513	355.5
52	6	QRFSDNANRIMDLQR	O. lupi female	1849	41	0.0221741	1849
52	7	RFSDNANRIMDLQRH	O. lupi female	2108	116	0.0550285	2108
52	8	FSDNANRIMDLQRHL	O. lupi female	1884.5	210.5	0.111701	1884.5
52	9	SDNANRIMDLQRHLT	O. lupi female	552	108	0.195652	552
52	10	DNANRIMDLQRHLTD	O. lupi female	513.5	80.5	0.156767	513.5
52	11	NANRIMDLQRHLTDA	O. lupi female	0	0	0	0
52	12	ANRIMDLQRHLTDAE	O. lupi female	0	0	0	0
52	13	NRIMDLQRHLTDAEN	O. lupi female	0	0	0	0
52	14	RIMDLQRHLTDAEND	O. lupi female	98.75	96.75	0.979747	0
52	15	IMDLQRHLTDAENDK	O. lupi female	0	0	0	0
52	16	MDLQRHLTDAENDKK	O. lupi female	39.25	39.25	1	0
52	17	DLQRHLTDAENDKKR	O. lupi female	0	0	0	0
52	18	LQRHLTDAENDKKRL	O. lupi female	449.5	449.5	1	0
52	19	QRHLTDAENDKKRLT	O. lupi female	0	0	0	0
52	20	RHLTDAENDKKRLTN	O. lupi female	0	0	0	0
52	21	HLTDAENDKKRLTNR	O. lupi female	0	0	0	0
52	22	LTDAENDKKRLTNRL	O. lupi female	0	0	0	0
52	23	TDAENDKKRLTNRLH	O. lupi female	104.5	55	0.526316	0
52	24	DAENDKKRLTNRLHS	O. lupi female	484.25	484.25	1	0
52	25	AENDKKRLTNRLHSL	O. lupi female	84.5	84.5	1	0
52	26	ENDKKRLTNRLHSLE	O. lupi female	0	0	0	0
52	27	NDKKRLTNRLHSLEK	O. lupi female	132	132	1	0
52	28	DKKRLTNRLHSLEKT	O. lupi female	0	0	0	0
52	29	KKRLTNRLHSLEKTV	O. lupi female	0	0	0	0
52	30	KRLTNRLHSLEKTVS	O. lupi female	0	0	0	0
52	31	RLTNRLHSLEKTVSQ	O. lupi female	0	0	0	0
52	32	LTNRLHSLEKTVSQQ	O. lupi female	0	0	0	0
52	33	TNRLHSLEKTVSQQR	O. lupi female	26.75	26.75	1	0
52	34	NRLHSLEKTVSQQRT	O. lupi female	0	0	0	0
52	35	RLHSLEKTVSQQRTI	O. lupi female	434	63	0.145161	434
52	36	LHSLEKTVSQQRTIE	O. lupi female	906.5	118.5	0.130723	906.5
52	37	HSLEKTVSQQRTIET	O. lupi female	248	248	1	0
52	38	SLEKTVSQQRTIETE	O. lupi female	0	0	0	0
52	39	LEKTVSQQRTIETEI	O. lupi female	103	103	1	0
52	40	EKTVSQQRTIETEIR	O. lupi female	0	0	0	0
52	41	KTVSQQRTIETEIRQ	O. lupi female	0	0	0	0
52	42	TVSQQRTIETEIRQQ	O. lupi female	0	0	0	0
52	43	VSQQRTIETEIRQQL	O. lupi female	257	88	0.342412	257
52	44	SQQRTIETEIRQQLS	O. lupi female	15.5	15.5	1	0
52	45	QQRTIETEIRQQLSL	O. lupi female	482	101	0.209544	482
52	46	QRTIETEIRQQLSLA	O. lupi female	0	0	0	0
52	47	RTIETEIRQQLSLAL	O. lupi female	207.25	185.75	0.896261	0
52	48	TIETEIRQQLSLALN	O. lupi female	0	0	0	0
52	49	IETEIRQQLSLALNE	O. lupi female	0	0	0	0
52	50	ETEIRQQLSLALNER	O. lupi female	50.25	50.25	1	0
52	51	TEIRQQLSLALNERN	O. lupi female	0	0	0	0
52	52	EIRQQLSLALNERNT	O. lupi female	7.5	7.5	1	0
52	53	IRQQLSLALNERNTL	O. lupi female	11.25	11.25	1	0
52	54	RQQLSLALNERNTLQ	O. lupi female	0	0	0	0
52	55	QQLSLALNERNTLQN	O. lupi female	20	20	1	0
52	56	QLSLALNERNTLQND	O. lupi female	131	131	1	0
52	57	LSLALNERNTLQNDL	O. lupi female	550.5	18.5	0.0336058	550.5
52	58	SLALNERNTLQNDLR	O. lupi female	9.5	9.5	1	0
52	59	LALNERNTLQNDLRD	O. lupi female	179.75	126.75	0.705146	0
52	60	ALNERNTLQNDLRDL	O. lupi female	109.75	39.25	0.357631	109.75
52	61	LNERNTLQNDLRDLQ	O. lupi female	147.5	147.5	1	0
52	62	NERNTLQNDLRDLQR	O. lupi female	332.5	53.5	0.160902	332.5
52	63	ERNTLQNDLRDLQRR	O. lupi female	1128.25	174.25	0.154443	1128.25
52	64	RNTLQNDLRDLQRRL	O. lupi female	308.5	220	0.713128	0
52	65	NTLQNDLRDLQRRLA	O. lupi female	0	0	0	0
52	66	TLQNDLRDLQRRLAR	O. lupi female	73.5	73.5	1	0
52	67	LQNDLRDLQRRLARM	O. lupi female	38	38	1	0
54	2	QNDLRDLQRRLARME	O. lupi female	0	0	0	0
54	3	NDLRDLQRRLARMET	O. lupi female	0	0	0	0
54	4	DLRDLQRRLARMETE	O. lupi female	3.75	3.75	1	0
54	5	LRDLQRRLARMETEK	O. lupi female	0	0	0	0
54	6	RDLQRRLARMETEKK	O. lupi female	0	0	0	0
54	7	DLQRRLARMETEKKI	O. lupi female	0	0	0	0
54	8	LQRRLARMETEKKIM	O. lupi female	0	0	0	0
54	9	QRRLARMETEKKIMN	O. lupi female	0	0	0	0
54	10	RRLARMETEKKIMND	O. lupi female	0	0	0	0
54	11	RLARMETEKKIMNDK	O. lupi female	0	0	0	0
54	12	LARMETEKKIMNDKY	O. lupi female	114.5	114.5	1	0
54	13	ARMETEKKIMNDKYD	O. lupi female	0	0	0	0
54	14	RMETEKKIMNDKYDE	O. lupi female	99.5	99.5	1	0
54	15	METEKKIMNDKYDEL	O. lupi female	0	0	0	0
54	16	ETEKKIMNDKYDELE	O. lupi female	0	0	0	0
54	17	TEKKIMNDKYDELEK	O. lupi female	0	0	0	0
54	18	EKKIMNDKYDELEKI	O. lupi female	231	189	0.818182	0
54	19	KKIMNDKYDELEKIR	O. lupi female	0	0	0	0
54	20	KIMNDKYDELEKIRA	O. lupi female	0	0	0	0
54	21	IMNDKYDELEKIRAS	O. lupi female	0	0	0	0
54	22	MNDKYDELEKIRASL	O. lupi female	0	0	0	0
54	23	NDKYDELEKIRASLI	O. lupi female	0	0	0	0
54	24	DKYDELEKIRASLIK	O. lupi female	0	0	0	0
54	25	KYDELEKIRASLIKR	O. lupi female	792.25	685.25	0.864942	0
54	26	YDELEKIRASLIKRI	O. lupi female	323.25	280.75	0.868523	0
54	27	DELEKIRASLIKRIE	O. lupi female	644.25	79.25	0.123011	644.25
54	28	ELEKIRASLIKRIEL	O. lupi female	913.25	107.25	0.117438	913.25
54	29	LEKIRASLIKRIELL	O. lupi female	894.75	22.75	0.0254261	894.75
54	30	EKIRASLIKRIELLD	O. lupi female	0	0	0	0
54	31	KIRASLIKRIELLDE	O. lupi female	0	0	0	0
54	32	IRASLIKRIELLDEE	O. lupi female	13.5	13.5	1	0
54	33	RASLIKRIELLDEEK	O. lupi female	0	0	0	0
54	34	ASLIKRIELLDEEKR	O. lupi female	0	0	0	0
54	35	SLIKRIELLDEEKRT	O. lupi female	0	0	0	0
54	36	LIKRIELLDEEKRTM	O. lupi female	28.75	28.75	1	0
54	37	IKRIELLDEEKRTME	O. lupi female	0	0	0	0
54	38	KRIELLDEEKRTMEN	O. lupi female	0	0	0	0
54	39	RIELLDEEKRTMENI	O. lupi female	212	20	0.0943396	212
54	40	IELLDEEKRTMENIL	O. lupi female	327.75	25.75	0.078566	327.75
54	41	ELLDEEKRTMENILH	O. lupi female	0	0	0	0
54	42	LLDEEKRTMENILHE	O. lupi female	0	0	0	0
54	43	LDEEKRTMENILHET	O. lupi female	0	0	0	0
54	44	DEEKRTMENILHETA	O. lupi female	0	0	0	0
54	45	EEKRTMENILHETAL	O. lupi female	22.5	22.5	1	0
54	46	EKRTMENILHETALQ	O. lupi female	0	0	0	0
54	47	KRTMENILHETALQR	O. lupi female	0	0	0	0
54	48	RTMENILHETALQRE	O. lupi female	0	0	0	0
54	49	TMENILHETALQREA	O. lupi female	0	0	0	0
54	50	MENILHETALQREAI	O. lupi female	83	83	1	0
54	51	ENILHETALQREAIE	O. lupi female	0	0	0	0
54	52	NILHETALQREAIES	O. lupi female	0	0	0	0
54	53	ILHETALQREAIESS	O. lupi female	0	0	0	0
54	54	LHETALQREAIESSL	O. lupi female	26.5	26.5	1	0
54	55	HETALQREAIESSLN	O. lupi female	0	0	0	0
54	56	ETALQREAIESSLNA	O. lupi female	320	320	1	0
54	57	TALQREAIESSLNAL	O. lupi female	0	0	0	0
54	58	ALQREAIESSLNALE	O. lupi female	0	0	0	0
54	59	LQREAIESSLNALER	O. lupi female	22	22	1	0
54	60	QREAIESSLNALERE	O. lupi female	0	0	0	0
54	61	REAIESSLNALEREN	O. lupi female	0	0	0	0
54	62	EAIESSLNALERENK	O. lupi female	0	0	0	0
54	63	AIESSLNALERENKE	O. lupi female	148	148	1	0
54	64	IESSLNALERENKEL	O. lupi female	0	0	0	0
54	65	ESSLNALERENKELH	O. lupi female	40.25	40.25	1	0
54	66	SSLNALERENKELHR	O. lupi female	0	0	0	0
54	67	SLNALERENKELHRN	O. lupi female	112.25	112.25	1	0
56	2	LNALERENKELHRNC	O. lupi female	1	1	1	0
56	3	NALERENKELHRNCA	O. lupi female	0	0	0	0
56	4	ALERENKELHRNCAQ	O. lupi female	112.25	112.25	1	0
56	5	LERENKELHRNCAQL	O. lupi female	19	19	1	0
56	6	ERENKELHRNCAQLQ	O. lupi female	0	0	0	0
56	7	RENKELHRNCAQLQQ	O. lupi female	454.5	454.5	1	0
56	8	ENKELHRNCAQLQQQ	O. lupi female	252	252	1	0
56	9	NKELHRNCAQLQQQI	O. lupi female	33.5	33.5	1	0
56	10	KELHRNCAQLQQQIA	O. lupi female	122	122	1	0
56	11	ELHRNCAQLQQQIAQ	O. lupi female	907.5	306.5	0.337741	907.5
56	12	LHRNCAQLQQQIAQL	O. lupi female	100.75	100.75	1	0
56	13	HRNCAQLQQQIAQLE	O. lupi female	135.5	135.5	1	0
56	14	RNCAQLQQQIAQLEL	O. lupi female	0	0	0	0
56	15	NCAQLQQQIAQLELE	O. lupi female	0	0	0	0
56	16	CAQLQQQIAQLELEN	O. lupi female	0	0	0	0
56	17	AQLQQQIAQLELENG	O. lupi female	58.5	58.5	1	0
56	18	QLQQQIAQLELENGN	O. lupi female	0	0	0	0
56	19	LQQQIAQLELENGNR	O. lupi female	60	60	1	0
56	20	QQQIAQLELENGNRL	O. lupi female	372.5	17.5	0.0469799	372.5
56	21	QQIAQLELENGNRLI	O. lupi female	980.5	93.5	0.0953595	980.5
56	22	QIAQLELENGNRLIQ	O. lupi female	319.5	45.5	0.14241	319.5
56	23	IAQLELENGNRLIQL	O. lupi female	825.75	37.25	0.0451105	825.75
56	24	AQLELENGNRLIQLT	O. lupi female	31.25	31.25	1	0
56	25	QLELENGNRLIQLTN	O. lupi female	493.75	184.25	0.373165	493.75
56	26	LELENGNRLIQLTNK	O. lupi female	417	417	1	0
56	27	ELENGNRLIQLTNKQ	O. lupi female	357.25	105.75	0.296011	357.25
56	28	LENGNRLIQLTNKQR	O. lupi female	0	0	0	0
56	29	ENGNRLIQLTNKQRE	O. lupi female	0	0	0	0
56	30	NGNRLIQLTNKQREE	O. lupi female	0	0	0	0
56	31	GNRLIQLTNKQREEY	O. lupi female	979	176	0.179775	979
56	32	NRLIQLTNKQREEYD	O. lupi female	779	437	0.560976	0
56	33	RLIQLTNKQREEYDK	O. lupi female	180.5	180.5	1	0
56	34	LIQLTNKQREEYDKF	O. lupi female	671.5	241.5	0.359643	671.5
56	35	IQLTNKQREEYDKFT	O. lupi female	110	110	1	0
56	36	QLTNKQREEYDKFTQ	O. lupi female	297.5	74.5	0.25042	297.5
56	37	LTNKQREEYDKFTQN	O. lupi female	546	11.5	0.0210623	546
56	38	TNKQREEYDKFTQNM	O. lupi female	1007.5	19.5	0.0193548	1007.5
56	39	NKQREEYDKFTQNMR	O. lupi female	1347	421	0.312546	1347
56	40	KQREEYDKFTQNMRT	O. lupi female	345.75	229.25	0.663051	0
56	41	QREEYDKFTQNMRTE	O. lupi female	175	57	0.325714	175
56	42	REEYDKFTQNMRTEK	O. lupi female	0	0	0	0
56	43	EEYDKFTQNMRTEKL	O. lupi female	123.75	27.25	0.220202	123.75
56	44	EYDKFTQNMRTEKLQ	O. lupi female	167	167	1	0
56	45	YDKFTQNMRTEKLQI	O. lupi female	0	0	0	0
56	46	DKFTQNMRTEKLQIE	O. lupi female	0	0	0	0
56	47	KFTQNMRTEKLQIER	O. lupi female	0	0	0	0
56	48	FTQNMRTEKLQIERI	O. lupi female	41.5	41.5	1	0
56	49	TQNMRTEKLQIERII	O. lupi female	3	3	1	0
56	50	QNMRTEKLQIERIIE	O. lupi female	37.5	4.5	0.12	37.5
56	51	NMRTEKLQIERIIES	O. lupi female	0.5	0.5	1	0
56	52	MRTEKLQIERIIESR	O. lupi female	0	0	0	0
56	53	RTEKLQIERIIESRE	O. lupi female	0	0	0	0
56	54	TEKLQIERIIESRER	O. lupi female	0	0	0	0
56	55	EKLQIERIIESRERS	O. lupi female	0	0	0	0
56	56	KLQIERIIESRERSL	O. lupi female	0	0	0	0
56	57	LQIERIIESRERSLK	O. lupi female	136.25	136.25	1	0
56	58	QIERIIESRERSLKS	O. lupi female	12.5	12.5	1	0
56	59	IERIIESRERSLKSR	O. lupi female	0	0	0	0
56	60	ERIIESRERSLKSRI	O. lupi female	168	168	1	0
56	61	RIIESRERSLKSRIN	O. lupi female	0	0	0	0
56	62	IIESRERSLKSRINQ	O. lupi female	72.5	72.5	1	0
56	63	IESRERSLKSRINQL	O. lupi female	98.5	1.5	0.0152284	98.5
56	64	ESRERSLKSRINQLE	O. lupi female	0	0	0	0
56	65	SRERSLKSRINQLEN	O. lupi female	37.5	37.5	1	0
56	66	RERSLKSRINQLENQ	O. lupi female	0	0	0	0
56	67	ERSLKSRINQLENQL	O. lupi female	250	88	0.352	250
58	2	RSLKSRINQLENQLN	O. lupi female	0	0	0	0
58	3	SLKSRINQLENQLNI	O. lupi female	0	0	0	0
58	4	LKSRINQLENQLNIM	O. lupi female	0	0	0	0
58	5	KSRINQLENQLNIMR	O. lupi female	0	0	0	0
58	6	SRINQLENQLNIMRD	O. lupi female	323.5	37.5	0.11592	323.5
58	7	RINQLENQLNIMRDQ	O. lupi female	635	51	0.080315	635
58	8	INQLENQLNIMRDQL	O. lupi female	833.5	41.5	0.04979	833.5
58	9	NQLENQLNIMRDQLN	O. lupi female	469.25	47.25	0.100693	469.25
58	10	QLENQLNIMRDQLNS	O. lupi female	101	101	1	0
58	11	LENQLNIMRDQLNSE	O. lupi female	0	0	0	0
58	12	ENQLNIMRDQLNSER	O. lupi female	0	0	0	0
58	13	NQLNIMRDQLNSERR	O. lupi female	452.5	50.5	0.111602	452.5
58	14	QLNIMRDQLNSERRR	O. lupi female	731.75	120.75	0.165015	731.75
58	15	LNIMRDQLNSERRRR	O. lupi female	953	25	0.0262329	953
58	16	NIMRDQLNSERRRRR	O. lupi female	135.25	101.25	0.748614	0
58	17	IMRDQLNSERRRRRE	O. lupi female	0	0	0	0
58	18	MRDQLNSERRRRREI	O. lupi female	127.5	121.5	0.952941	0
58	19	RDQLNSERRRRREIS	O. lupi female	0	0	0	0
58	20	DQLNSERRRRREISD	O. lupi female	0	0	0	0
58	21	QLNSERRRRREISDK	O. lupi female	75.5	75.5	1	0
58	22	LNSERRRRREISDKI	O. lupi female	0	0	0	0
58	23	NSERRRRREISDKIL	O. lupi female	0	0	0	0
58	24	SERRRRREISDKILS	O. lupi female	0	0	0	0
58	25	ERRRRREISDKILSG	O. lupi female	0	0	0	0
58	26	RRRRREISDKILSGE	O. lupi female	0	0	0	0
58	27	RRRREISDKILSGEV	O. lupi female	0	0	0	0
58	28	RRREISDKILSGEVN	O. lupi female	57	57	1	0
58	29	RREISDKILSGEVNK	O. lupi female	92.75	92.75	1	0
58	30	REISDKILSGEVNKL	O. lupi female	19	19	1	0
58	31	EISDKILSGEVNKLN	O. lupi female	0	0	0	0
58	32	ISDKILSGEVNKLNV	O. lupi female	0	0	0	0
58	33	SDKILSGEVNKLNVT	O. lupi female	0	0	0	0
58	34	DKILSGEVNKLNVTL	O. lupi female	69.75	69.75	1	0
58	35	KILSGEVNKLNVTLS	O. lupi female	0	0	0	0
58	36	ILSGEVNKLNVTLSG	O. lupi female	0	0	0	0
58	37	LSGEVNKLNVTLSGI	O. lupi female	0	0	0	0
58	38	SGEVNKLNVTLSGIP	O. lupi female	0	0	0	0
58	39	GEVNKLNVTLSGIPD	O. lupi female	0	0	0	0
58	40	EVNKLNVTLSGIPDA	O. lupi female	0	0	0	0
58	41	VNKLNVTLSGIPDAY	O. lupi female	103.5	47.5	0.458937	0
58	42	NKLNVTLSGIPDAYE	O. lupi female	0	0	0	0
58	43	KLNVTLSGIPDAYEI	O. lupi female	993	67	0.0674723	993
58	44	LNVTLSGIPDAYEIY	O. lupi female	1340	114.5	0.0854478	1340
58	45	NVTLSGIPDAYEIYD	O. lupi female	686.5	109.5	0.159505	686.5
58	46	VTLSGIPDAYEIYDR	O. lupi female	1101.5	110.5	0.100318	1101.5
58	47	TLSGIPDAYEIYDRT	O. lupi female	242.5	177.5	0.731959	0
58	48	LSGIPDAYEIYDRTL	O. lupi female	1559	171	0.109686	1559
58	49	SGIPDAYEIYDRTLY	O. lupi female	2365.5	366.5	0.154936	2365.5
58	50	GIPDAYEIYDRTLYS	O. lupi female	1120	87	0.0776786	1120
58	51	IPDAYEIYDRTLYSY	O. lupi female	2169	151	0.0696173	2169
58	52	PDAYEIYDRTLYSYN	O. lupi female	1902.25	88.75	0.0466553	1902.25
58	53	DAYEIYDRTLYSYNT	O. lupi female	92.75	92.75	1	0
58	54	AYEIYDRTLYSYNTY	O. lupi female	1423	160	0.112439	1423
58	55	YEIYDRTLYSYNTYF	O. lupi female	2098	37	0.0176358	2098
58	56	EIYDRTLYSYNTYFG	O. lupi female	1374.25	194.25	0.14135	1374.25
58	57	IYDRTLYSYNTYFGT	O. lupi female	381.5	29.5	0.0773263	381.5
58	58	YDRTLYSYNTYFGTP	O. lupi female	1357.5	269.5	0.198527	1357.5
58	59	DRTLYSYNTYFGTPS	O. lupi female	615.5	184.5	0.299756	615.5
58	60	RTLYSYNTYFGTPSF	O. lupi female	1527.75	981.75	0.642612	0
58	61	TLYSYNTYFGTPSFT	O. lupi female	9.5	9.5	1	0
58	62	LYSYNTYFGTPSFTV	O. lupi female	596.75	140.75	0.235861	596.75
58	63	YSYNTYFGTPSFTVG	O. lupi female	0	0	0	0
58	64	SYNTYFGTPSFTVGS	O. lupi female	5	5	1	0
58	65	YNTYFGTPSFTVGSS	O. lupi female	0	0	0	0
58	66	NTYFGTPSFTVGSSS	O. lupi female	110	110	1	0
58	67	TYFGTPSFTVGSSSF	O. lupi female	332.5	122.5	0.368421	332.5
60	2	YFGTPSFTVGSSSFD	O. lupi female	0	0	0	0
60	3	FGTPSFTVGSSSFDP	O. lupi female	78.75	78.75	1	0
60	4	GTPSFTVGSSSFDPN	O. lupi female	186.75	72.25	0.386881	186.75
60	5	TPSFTVGSSSFDPNI	O. lupi female	0	0	0	0
60	6	PSFTVGSSSFDPNIT	O. lupi female	0	0	0	0
60	7	SFTVGSSSFDPNITD	O. lupi female	0	0	0	0
60	8	FTVGSSSFDPNITDD	O. lupi female	0	0	0	0
60	9	TVGSSSFDPNITDDS	O. lupi female	0	0	0	0
60	10	VGSSSFDPNITDDSK	O. lupi female	0	0	0	0
60	11	GSSSFDPNITDDSKI	O. lupi female	65.5	65.5	1	0
60	12	SSSFDPNITDDSKII	O. lupi female	0	0	0	0
60	13	SSFDPNITDDSKIIL	O. lupi female	0	0	0	0
60	14	SFDPNITDDSKIILK	O. lupi female	119.5	119.5	1	0
60	15	FDPNITDDSKIILKH	O. lupi female	2	2	1	0
60	16	DPNITDDSKIILKHS	O. lupi female	0	0	0	0
60	17	PNITDDSKIILKHSD	O. lupi female	0	0	0	0
60	18	NITDDSKIILKHSDR	O. lupi female	245.5	245.5	1	0
60	19	ITDDSKIILKHSDRL	O. lupi female	30	30	1	0
60	20	TDDSKIILKHSDRLE	O. lupi female	23	23	1	0
60	21	DDSKIILKHSDRLES	O. lupi female	0	0	0	0
60	22	DSKIILKHSDRLESS	O. lupi female	175.5	175.5	1	0
60	23	SKIILKHSDRLESSY	O. lupi female	0	0	0	0
60	24	KIILKHSDRLESSYA	O. lupi female	27.5	27.5	1	0
60	25	IILKHSDRLESSYAY	O. lupi female	879.25	306.75	0.348877	879.25
60	26	ILKHSDRLESSYAYG	O. lupi female	341.25	61.25	0.179487	341.25
60	27	LKHSDRLESSYAYGG	O. lupi female	66.5	66.5	1	0
60	28	KHSDRLESSYAYGGG	O. lupi female	0	0	0	0
60	29	HSDRLESSYAYGGGN	O. lupi female	1179	139	0.117897	1179
60	30	SDRLESSYAYGGGNH	O. lupi female	1129	201.5	0.178477	1129
60	31	DRLESSYAYGGGNHT	O. lupi female	730	339	0.464384	0
60	32	RLESSYAYGGGNHTS	O. lupi female	0	0	0	0
60	33	LESSYAYGGGNHTSD	O. lupi female	0	0	0	0
60	34	ESSYAYGGGNHTSDT	O. lupi female	72.5	72.5	1	0
60	35	SSYAYGGGNHTSDTA	O. lupi female	0	0	0	0
60	36	SYAYGGGNHTSDTAI	O. lupi female	16.75	16.75	1	0
60	37	YAYGGGNHTSDTAIT	O. lupi female	0	0	0	0
60	38	AYGGGNHTSDTAITA	O. lupi female	67	67	1	0
60	39	YGGGNHTSDTAITAP	O. lupi female	541.25	391.25	0.722864	0
60	40	GGGNHTSDTAITAPT	O. lupi female	0	0	0	0
60	41	GGNHTSDTAITAPTG	O. lupi female	0	0	0	0
60	42	GNHTSDTAITAPTGS	O. lupi female	66.5	66.5	1	0
60	43	NHTSDTAITAPTGSS	O. lupi female	0	0	0	0
60	44	HTSDTAITAPTGSSS	O. lupi female	0	0	0	0
60	45	TSDTAITAPTGSSSY	O. lupi female	0	0	0	0
60	46	SDTAITAPTGSSSYH	O. lupi female	93.5	89.5	0.957219	0
60	47	DTAITAPTGSSSYHS	O. lupi female	0	0	0	0
60	48	TAITAPTGSSSYHSQ	O. lupi female	0	0	0	0
60	49	AITAPTGSSSYHSQR	O. lupi female	0	0	0	0
60	50	ITAPTGSSSYHSQRS	O. lupi female	0	0	0	0
60	51	TAPTGSSSYHSQRSD	O. lupi female	0	0	0	0
60	52	APTGSSSYHSQRSDD	O. lupi female	0	0	0	0
60	53	PTGSSSYHSQRSDDH	O. lupi female	54.5	54.5	1	0
60	54	TGSSSYHSQRSDDHT	O. lupi female	0	0	0	0
60	55	GSSSYHSQRSDDHTV	O. lupi female	0	0	0	0
60	56	SSSYHSQRSDDHTVN	O. lupi female	0	0	0	0
60	57	SSYHSQRSDDHTVNE	O. lupi female	81.5	81.5	1	0
60	58	SYHSQRSDDHTVNES	O. lupi female	0	0	0	0
60	59	YHSQRSDDHTVNESE	O. lupi female	0	0	0	0
60	60	HSQRSDDHTVNESEG	O. lupi female	0	0	0	0
60	61	SQRSDDHTVNESEGG	O. lupi female	0	0	0	0
60	62	QRSDDHTVNESEGGG	O. lupi female	19.75	19.75	1	0
60	63	RSDDHTVNESEGGGN	O. lupi female	0	0	0	0
60	64	SDDHTVNESEGGGND	O. lupi female	0	0	0	0
60	65	DDHTVNESEGGGNDP	O. lupi female	0	0	0	0
60	66	DHTVNESEGGGNDPG	O. lupi female	0	0	0	0
60	67	HTVNESEGGGNDPGK	O. lupi female	0	0	0	0
62	2	TVNESEGGGNDPGKG	O. lupi female	0	0	0	0
62	3	VNESEGGGNDPGKGT	O. lupi female	0	0	0	0
62	4	NESEGGGNDPGKGTK	O. lupi female	0	0	0	0
62	5	ESEGGGNDPGKGTKQ	O. lupi female	0	0	0	0
62	6	SEGGGNDPGKGTKQV	O. lupi female	0	0	0	0
62	7	EGGGNDPGKGTKQVD	O. lupi female	99.5	99.5	1	0
62	8	GGGNDPGKGTKQVDG	O. lupi female	0	0	0	0
62	9	GGNDPGKGTKQVDGE	O. lupi female	0	0	0	0
62	10	GNDPGKGTKQVDGEG	O. lupi female	0	0	0	0
62	11	NDPGKGTKQVDGEGG	O. lupi female	0	0	0	0
62	12	DPGKGTKQVDGEGGS	O. lupi female	80.75	80.75	1	0
62	13	PGKGTKQVDGEGGSL	O. lupi female	0	0	0	0
62	14	GKGTKQVDGEGGSLS	O. lupi female	0	0	0	0
62	15	KGTKQVDGEGGSLSL	O. lupi female	53.5	53.5	1	0
62	16	GTKQVDGEGGSLSLS	O. lupi female	0	0	0	0
62	17	TKQVDGEGGSLSLSE	O. lupi female	0	0	0	0
62	18	KQVDGEGGSLSLSEI	O. lupi female	32.25	32.25	1	0
[truncated: 846 more rows]
